# Supplementary material for: High expression of six-transmembrane epithelial antigen of prostate 3 promotes the migration and invasion and predicts unfavorable prognosis in glioma
Source: PeerJ journal article supplement (doi:10.7717/peerj.15136), 2023-03-28

Figure 2A:

Overall survival


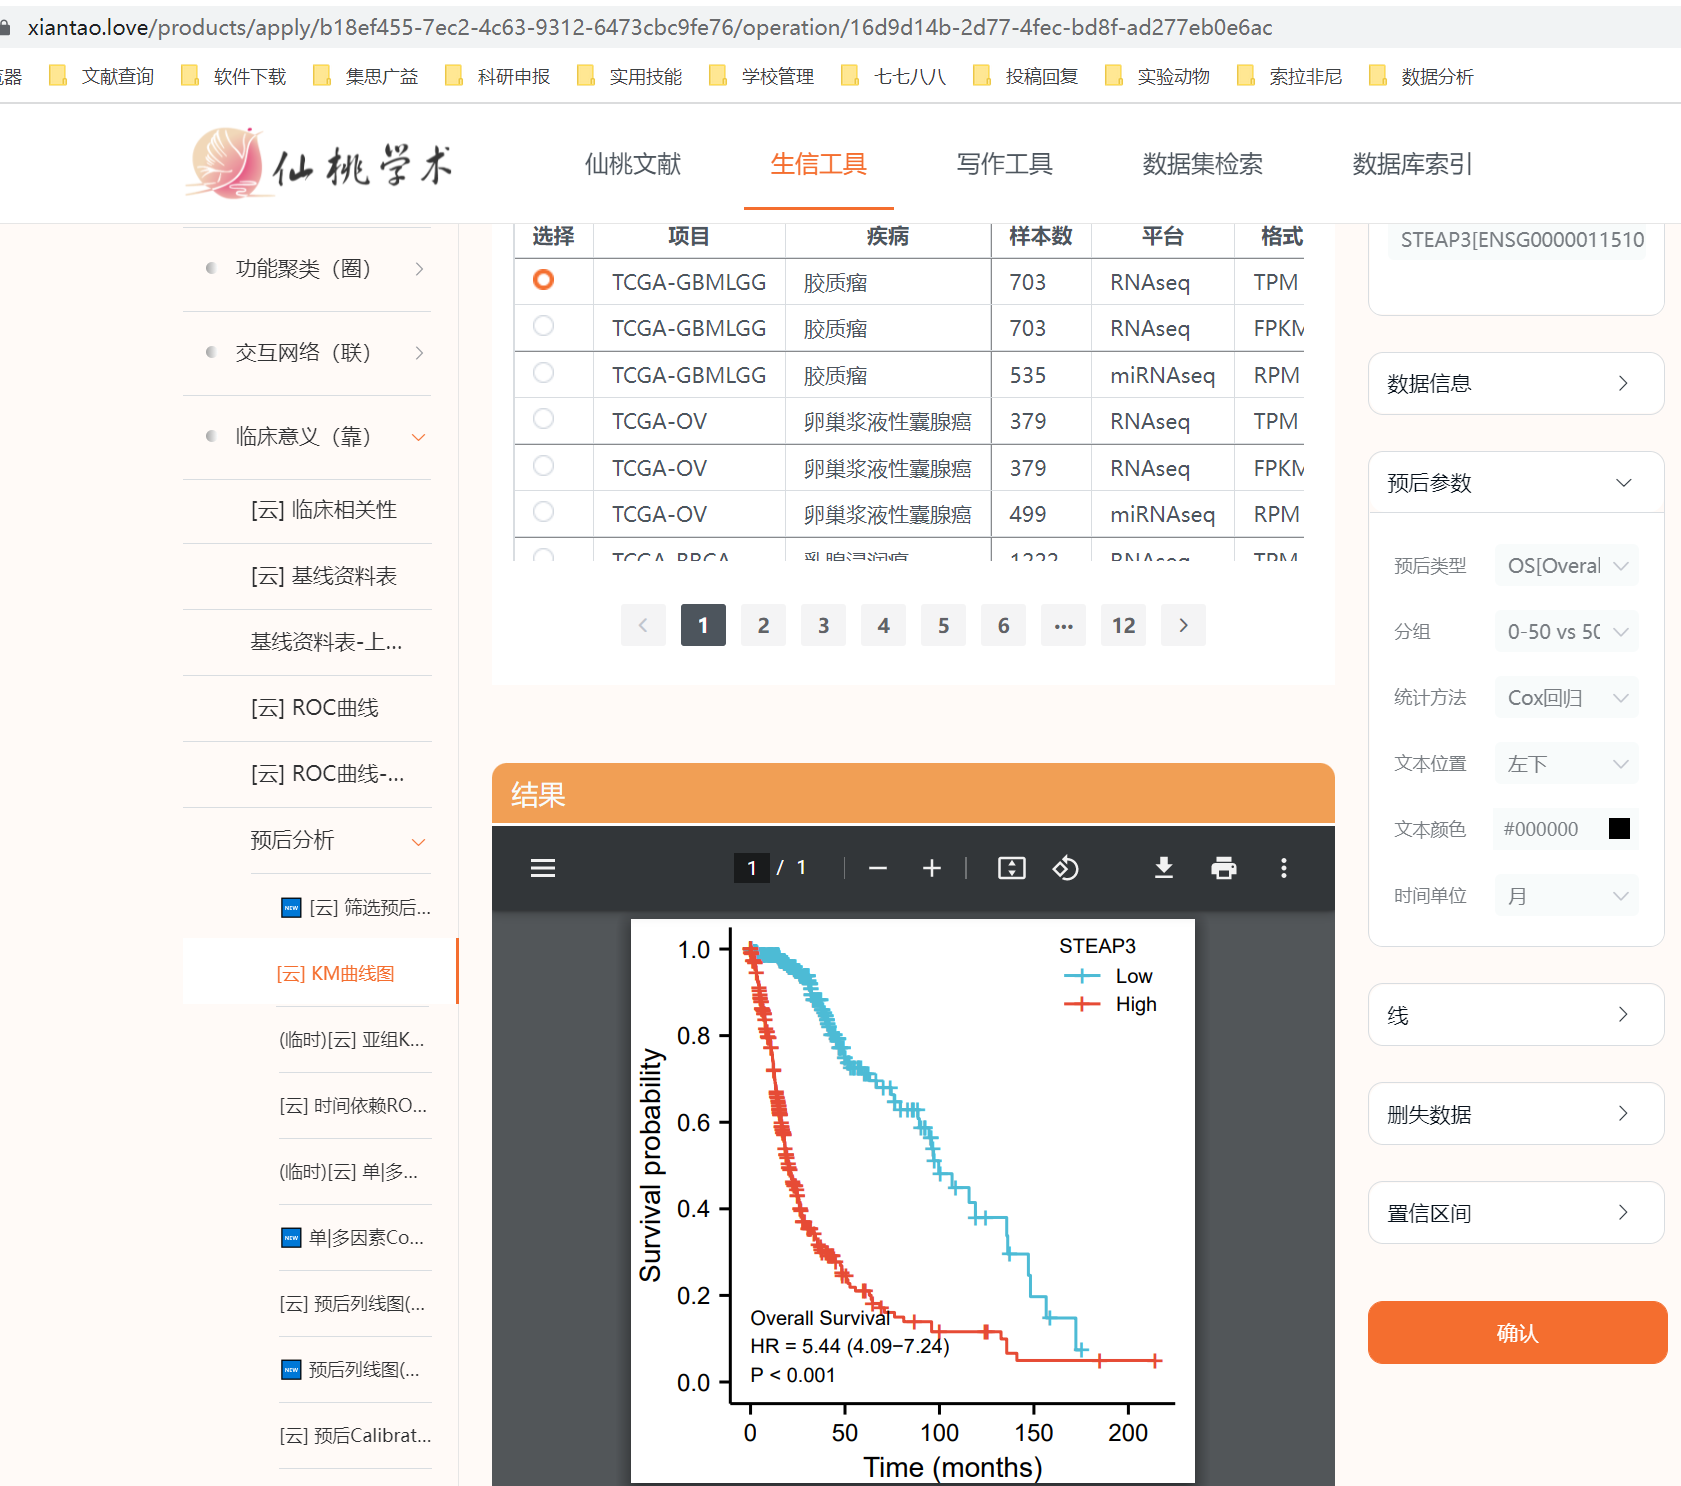


Disease specific survival


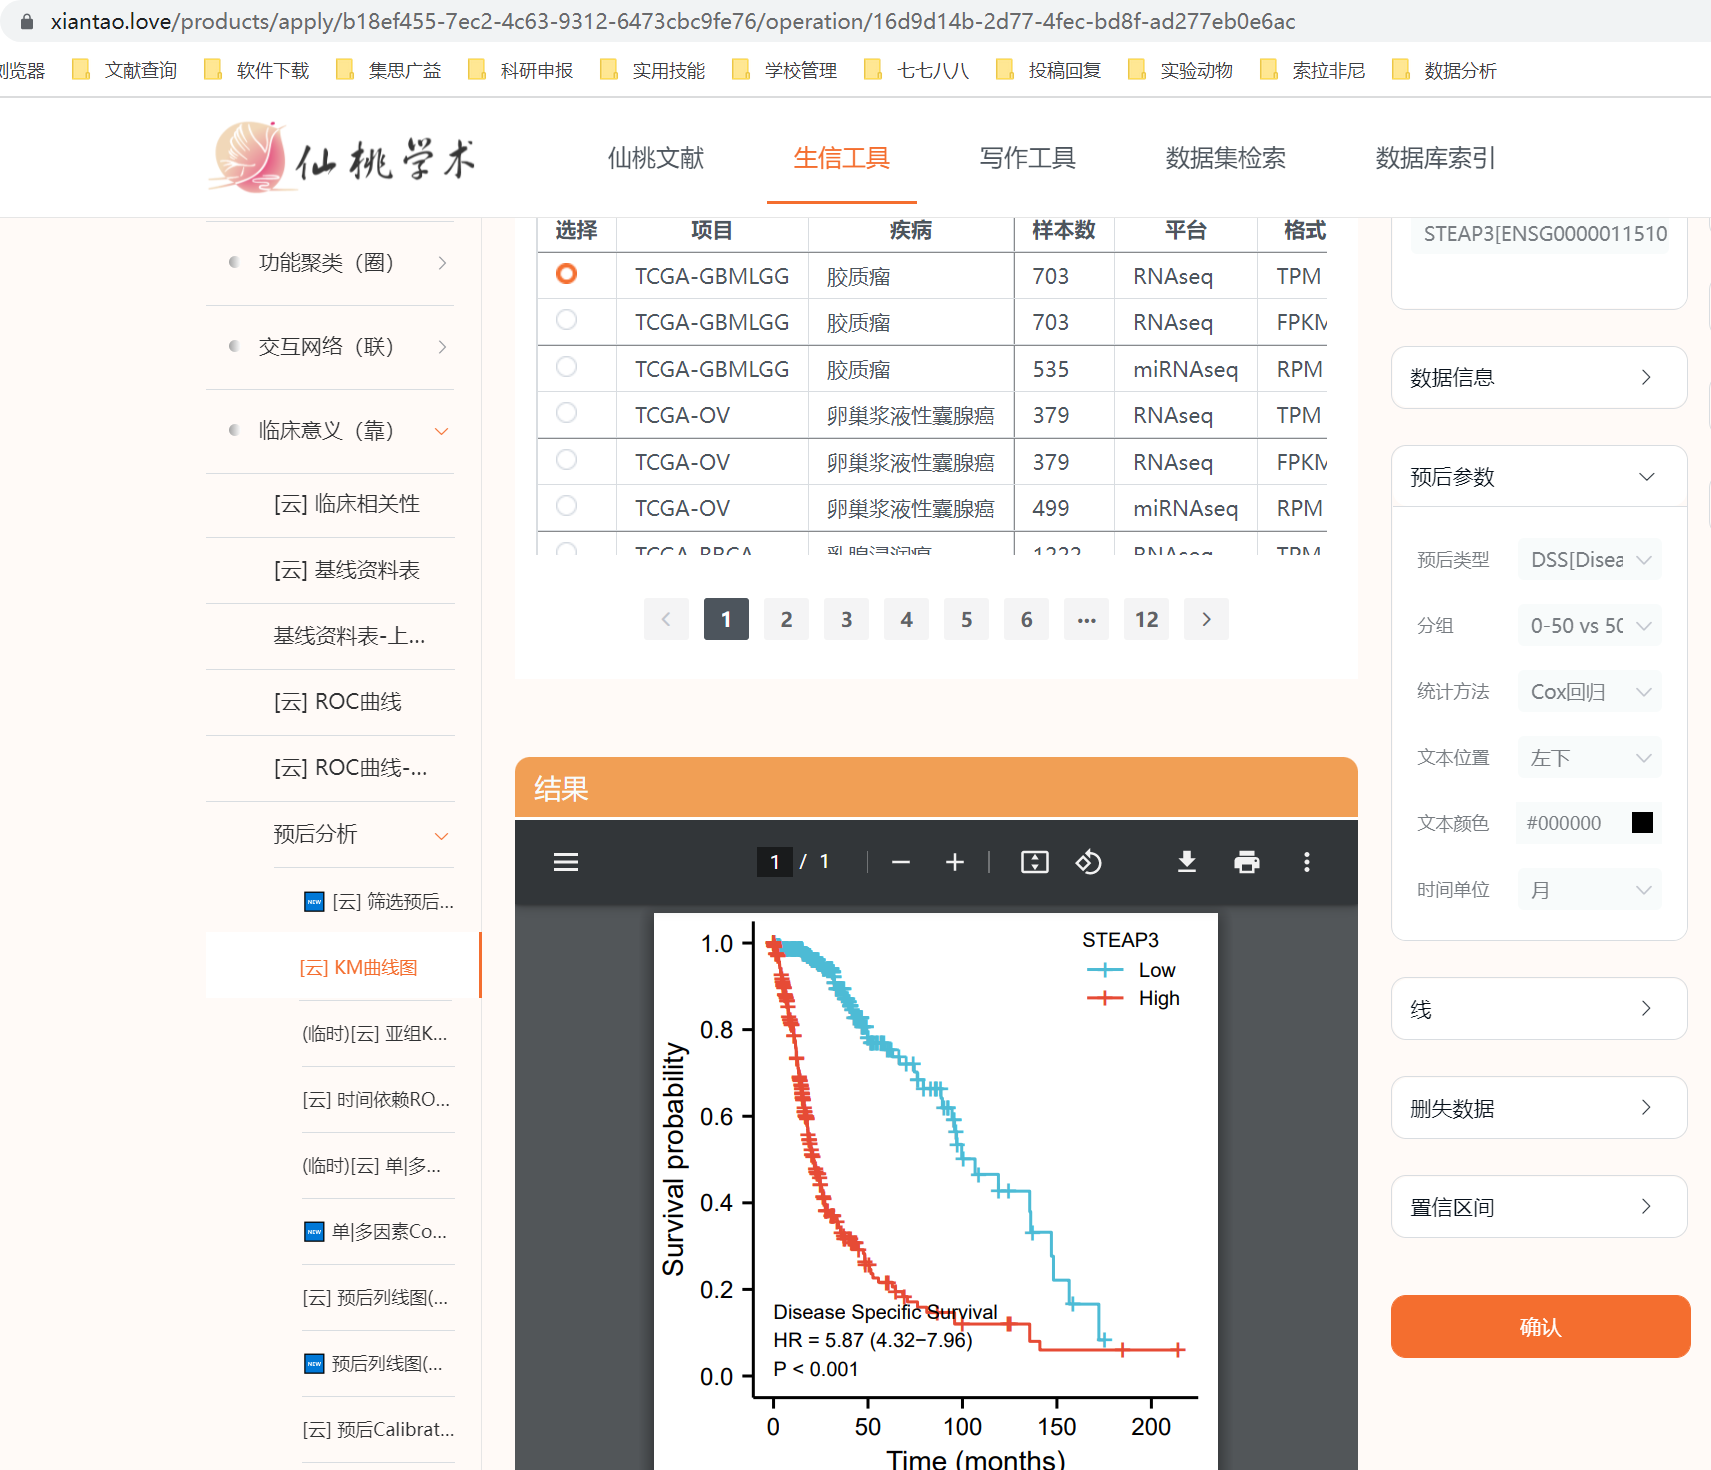


Progression free survival


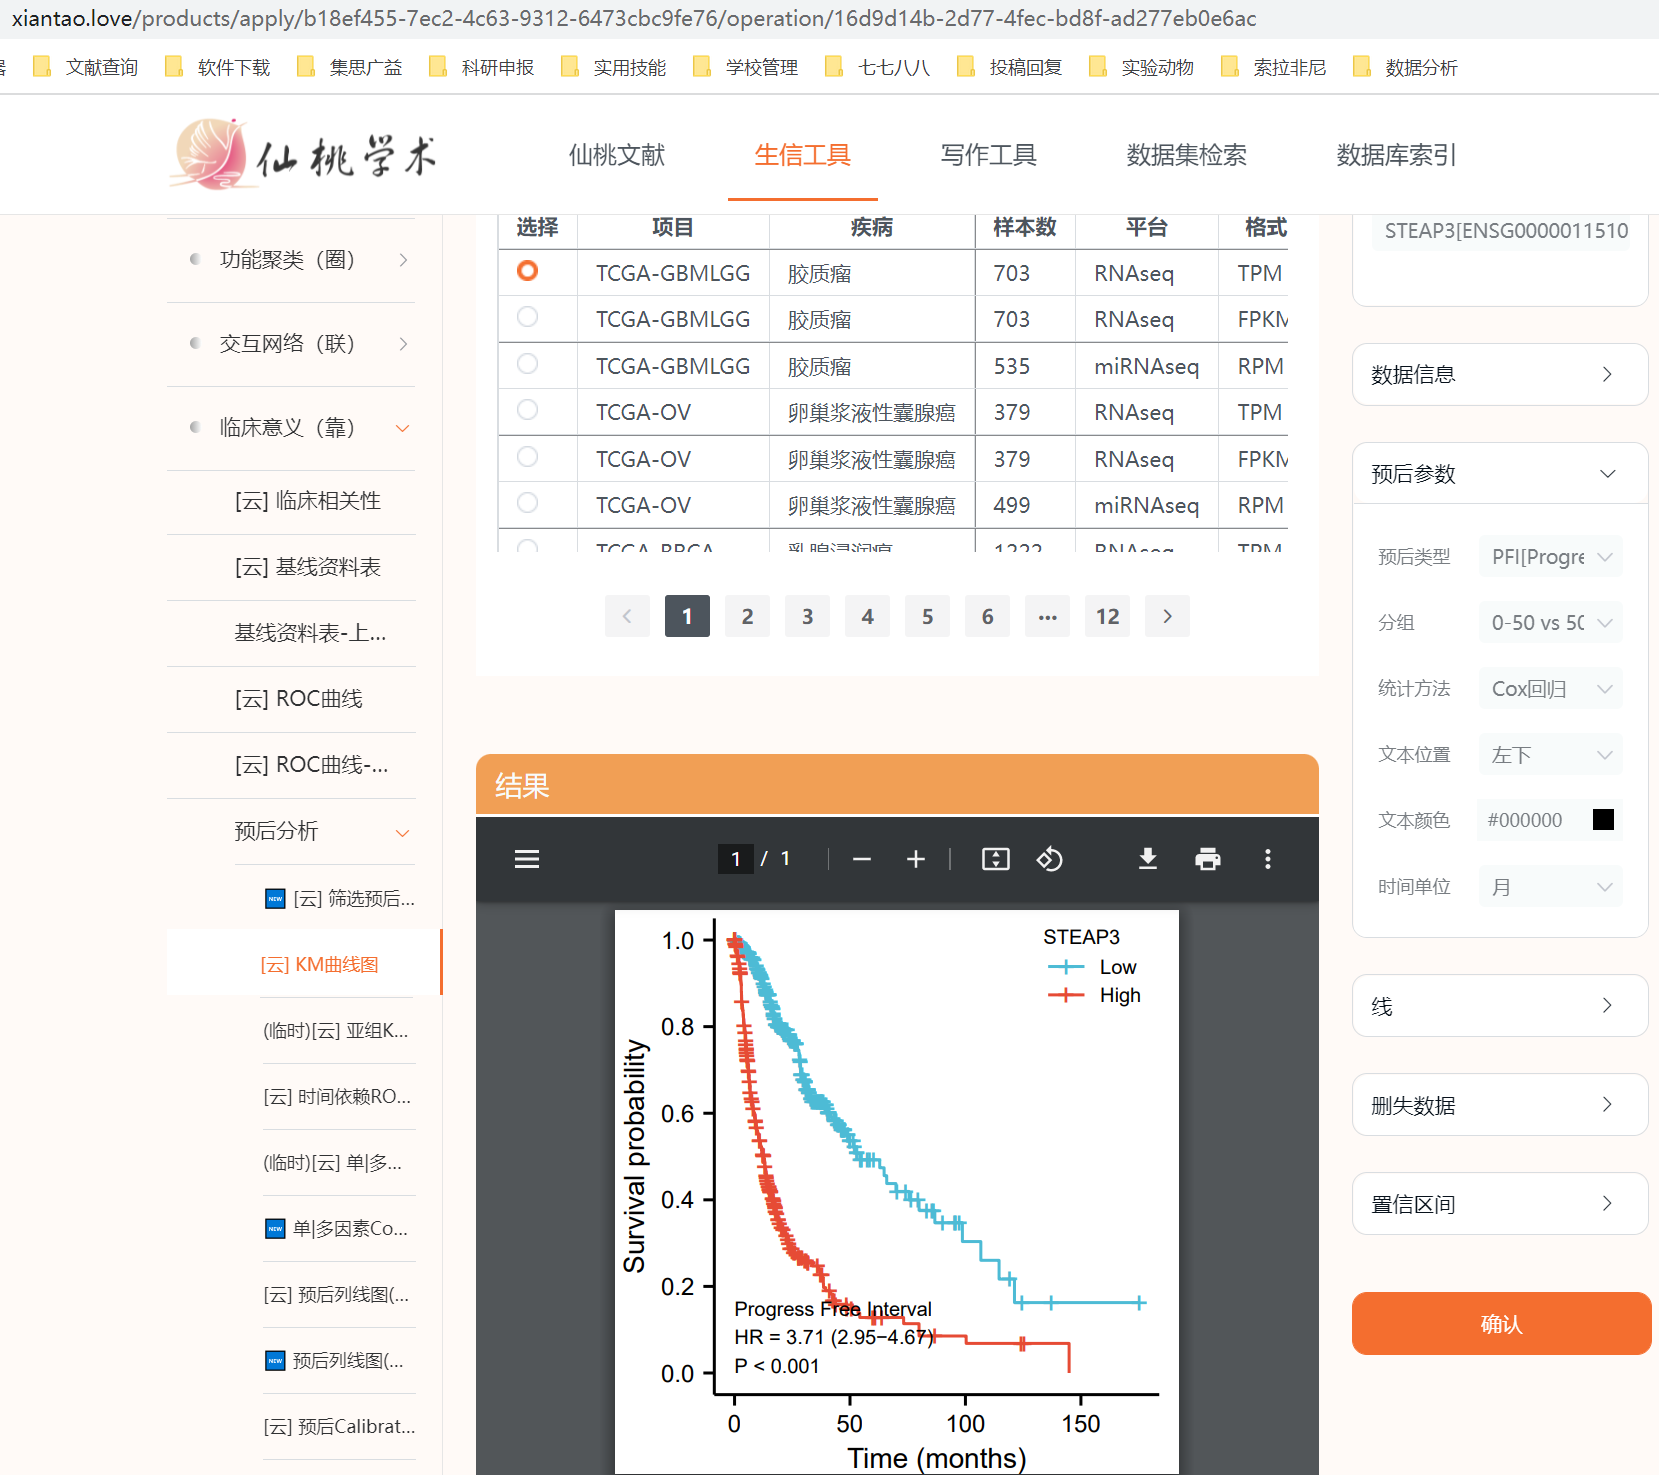


Figure 2B:

Overall survival


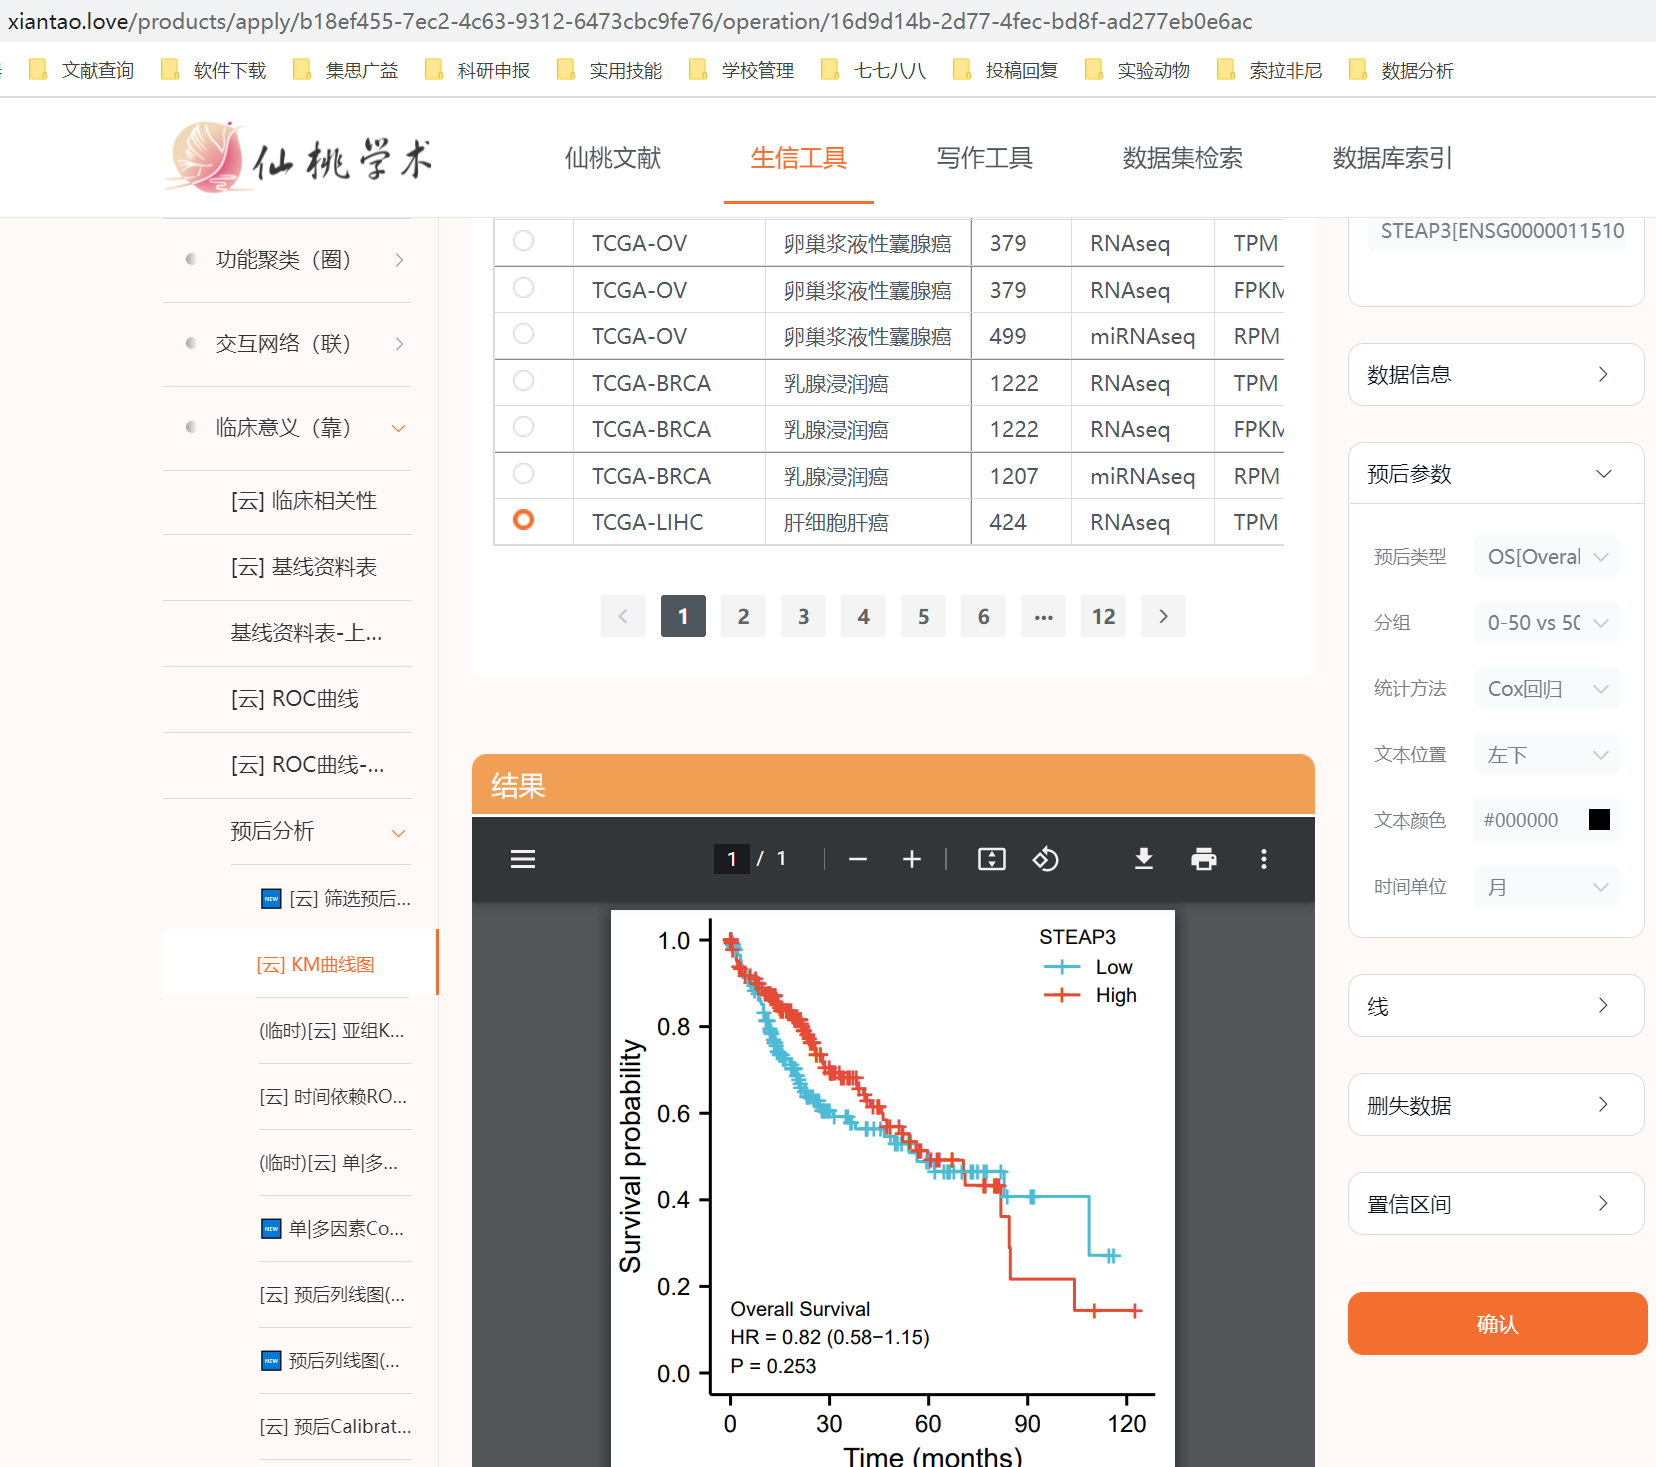


Disease specific survival


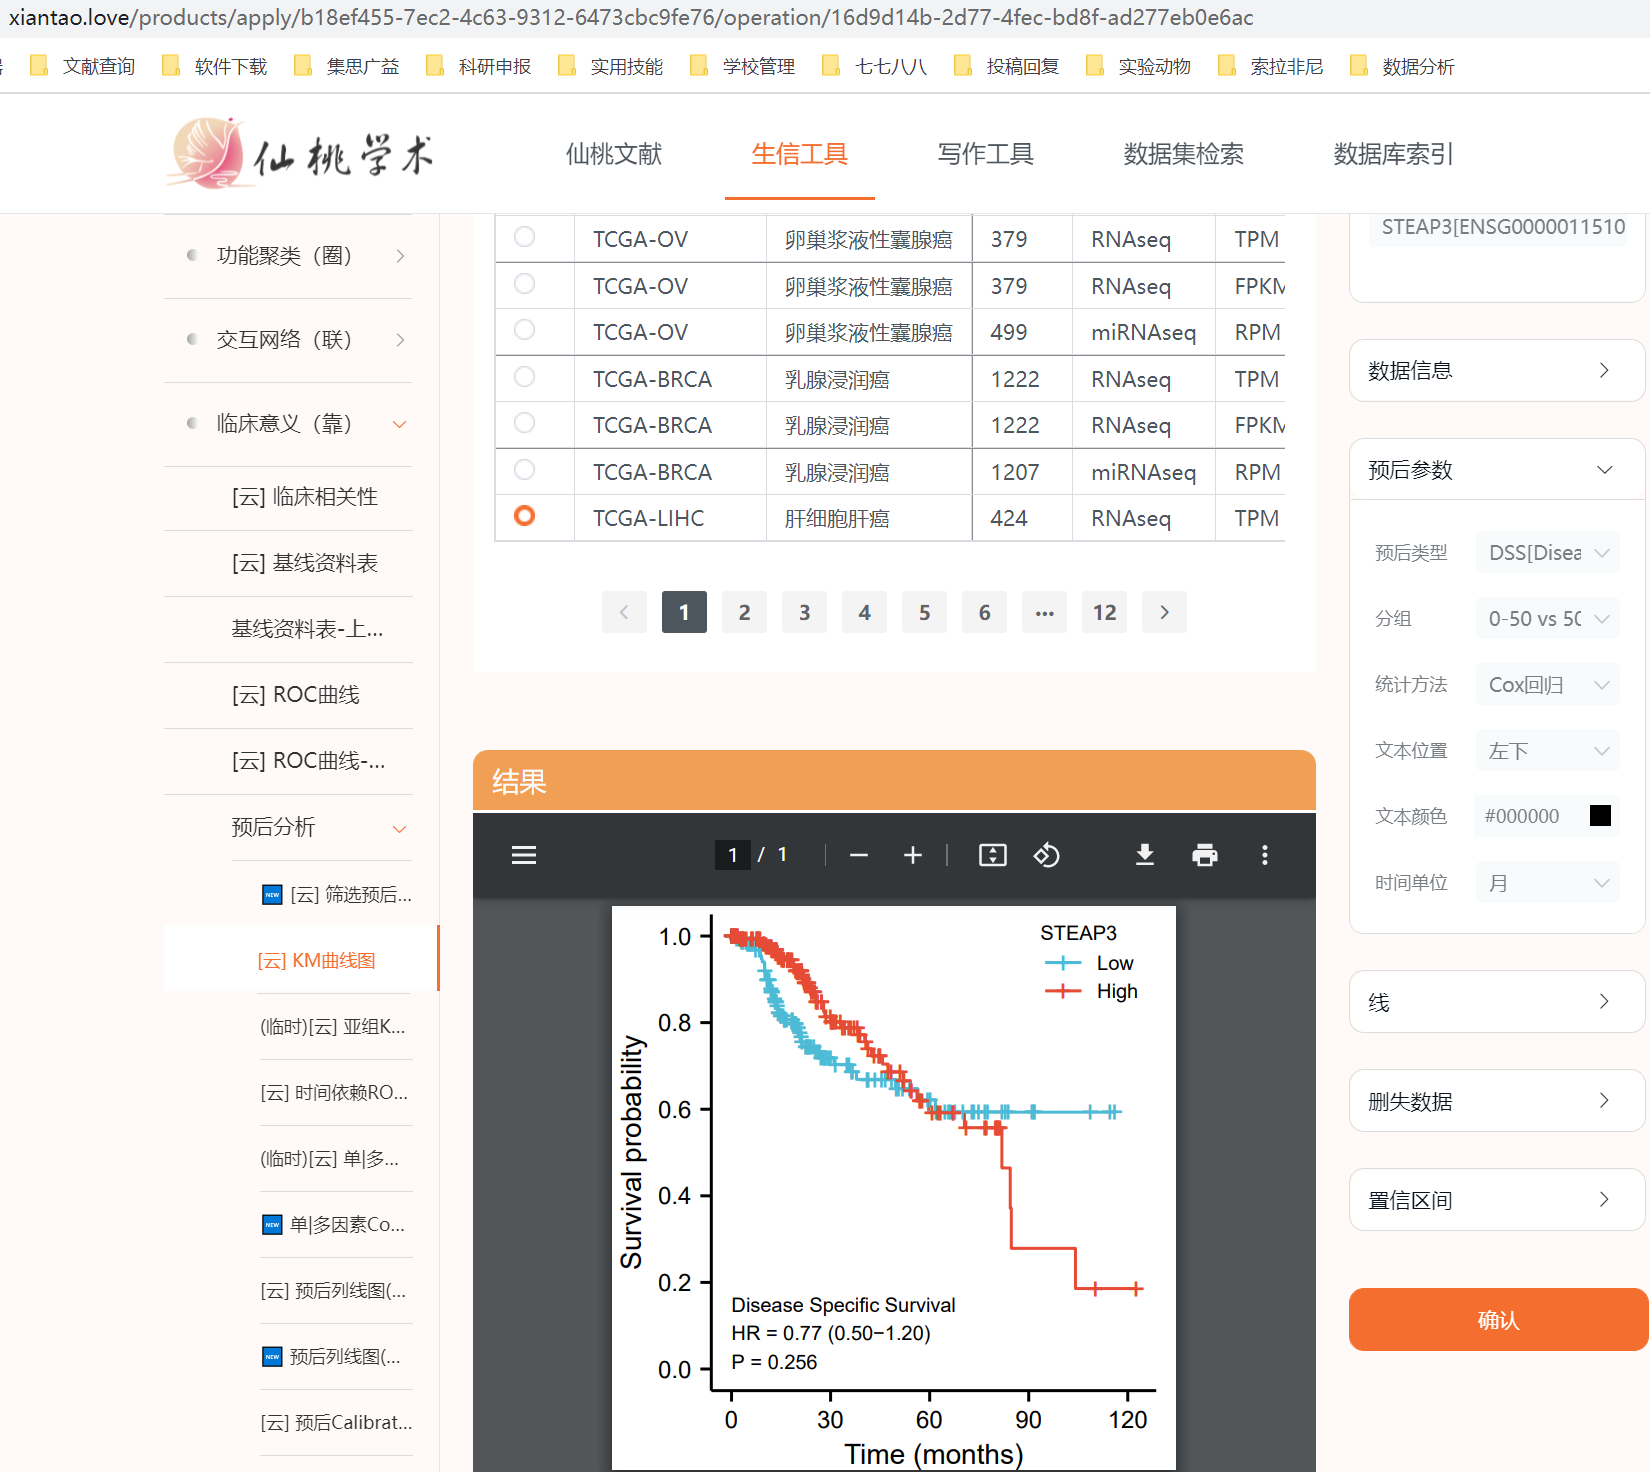


Progression free survival


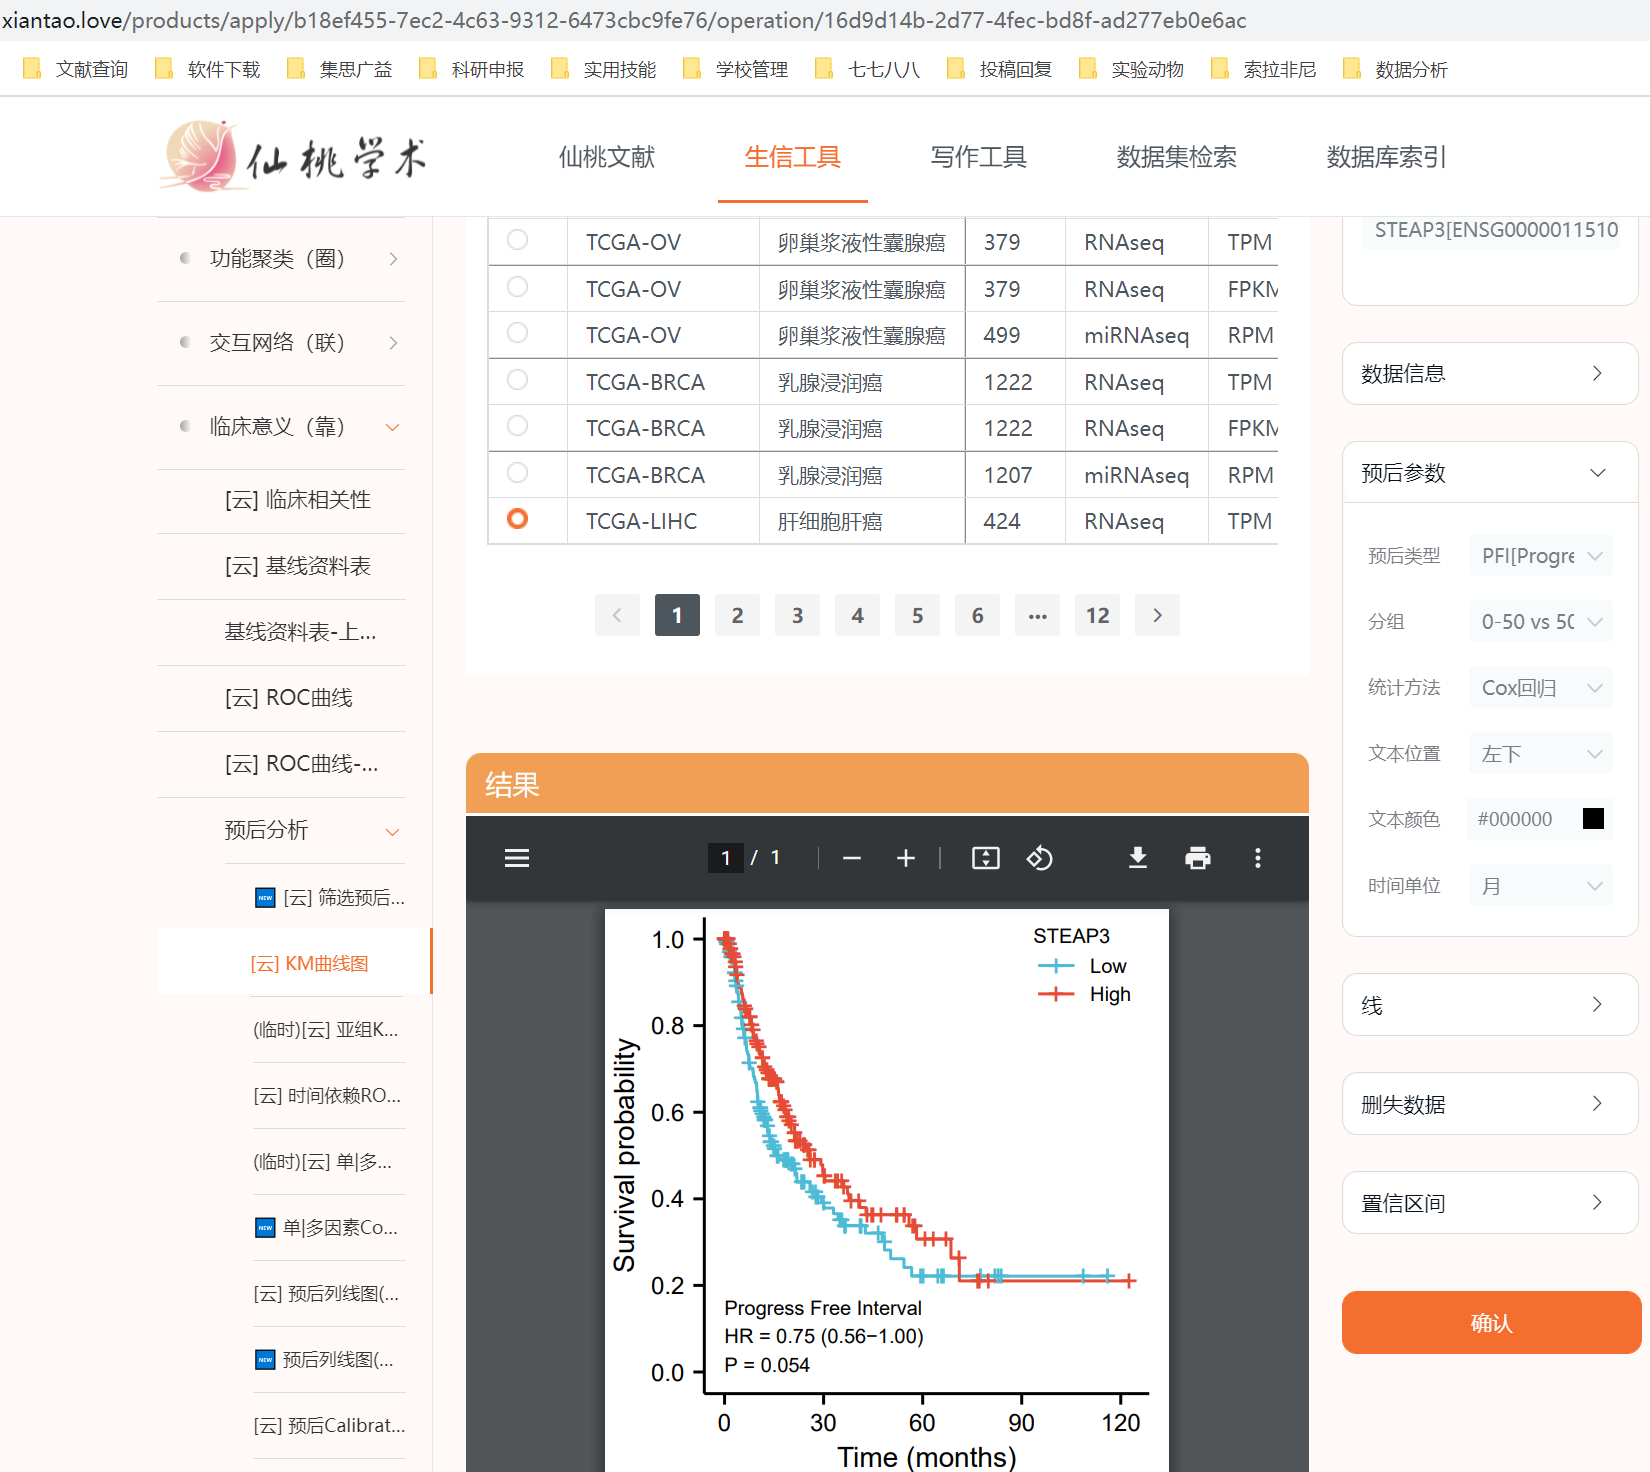


Figure 2C:

Overall survival


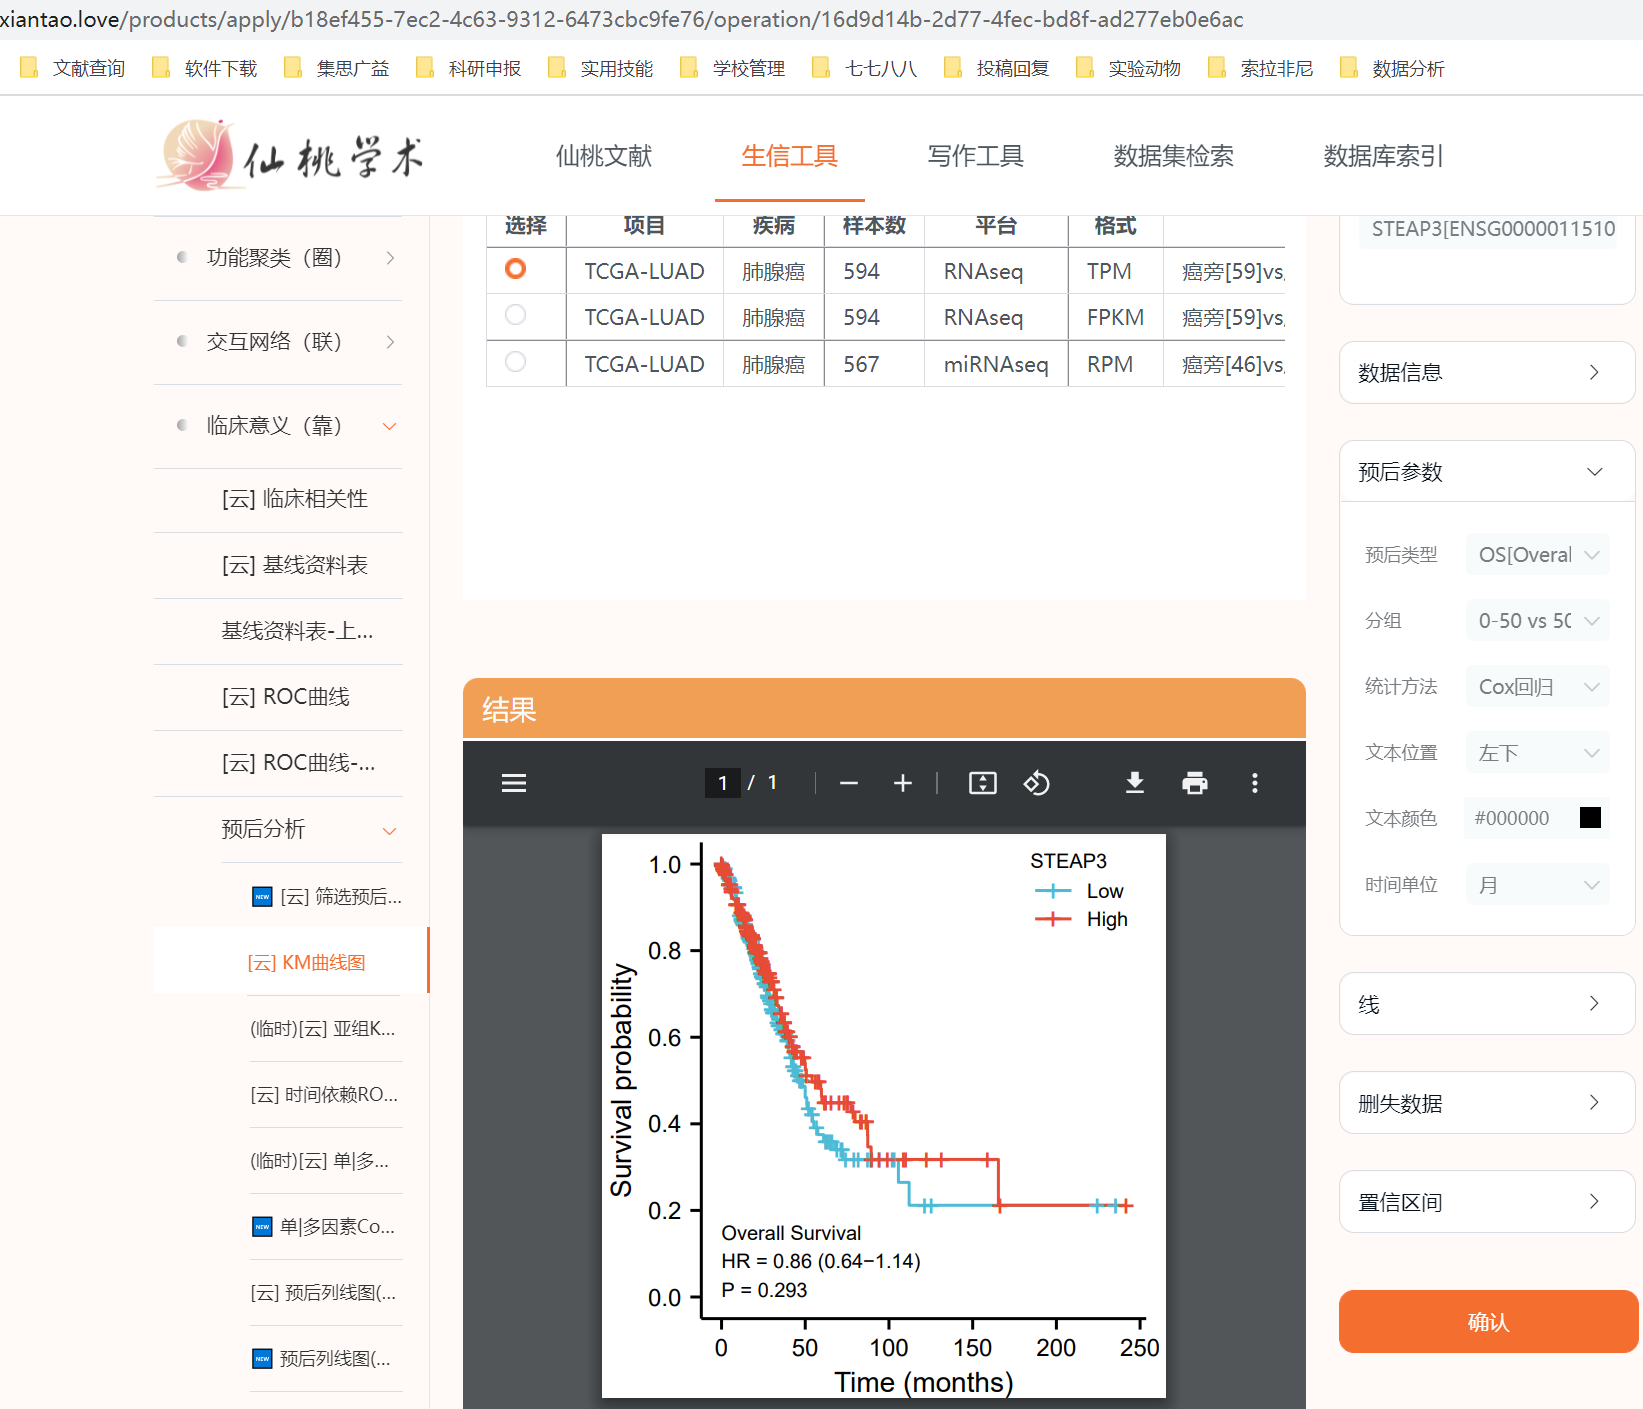


Disease specific survival


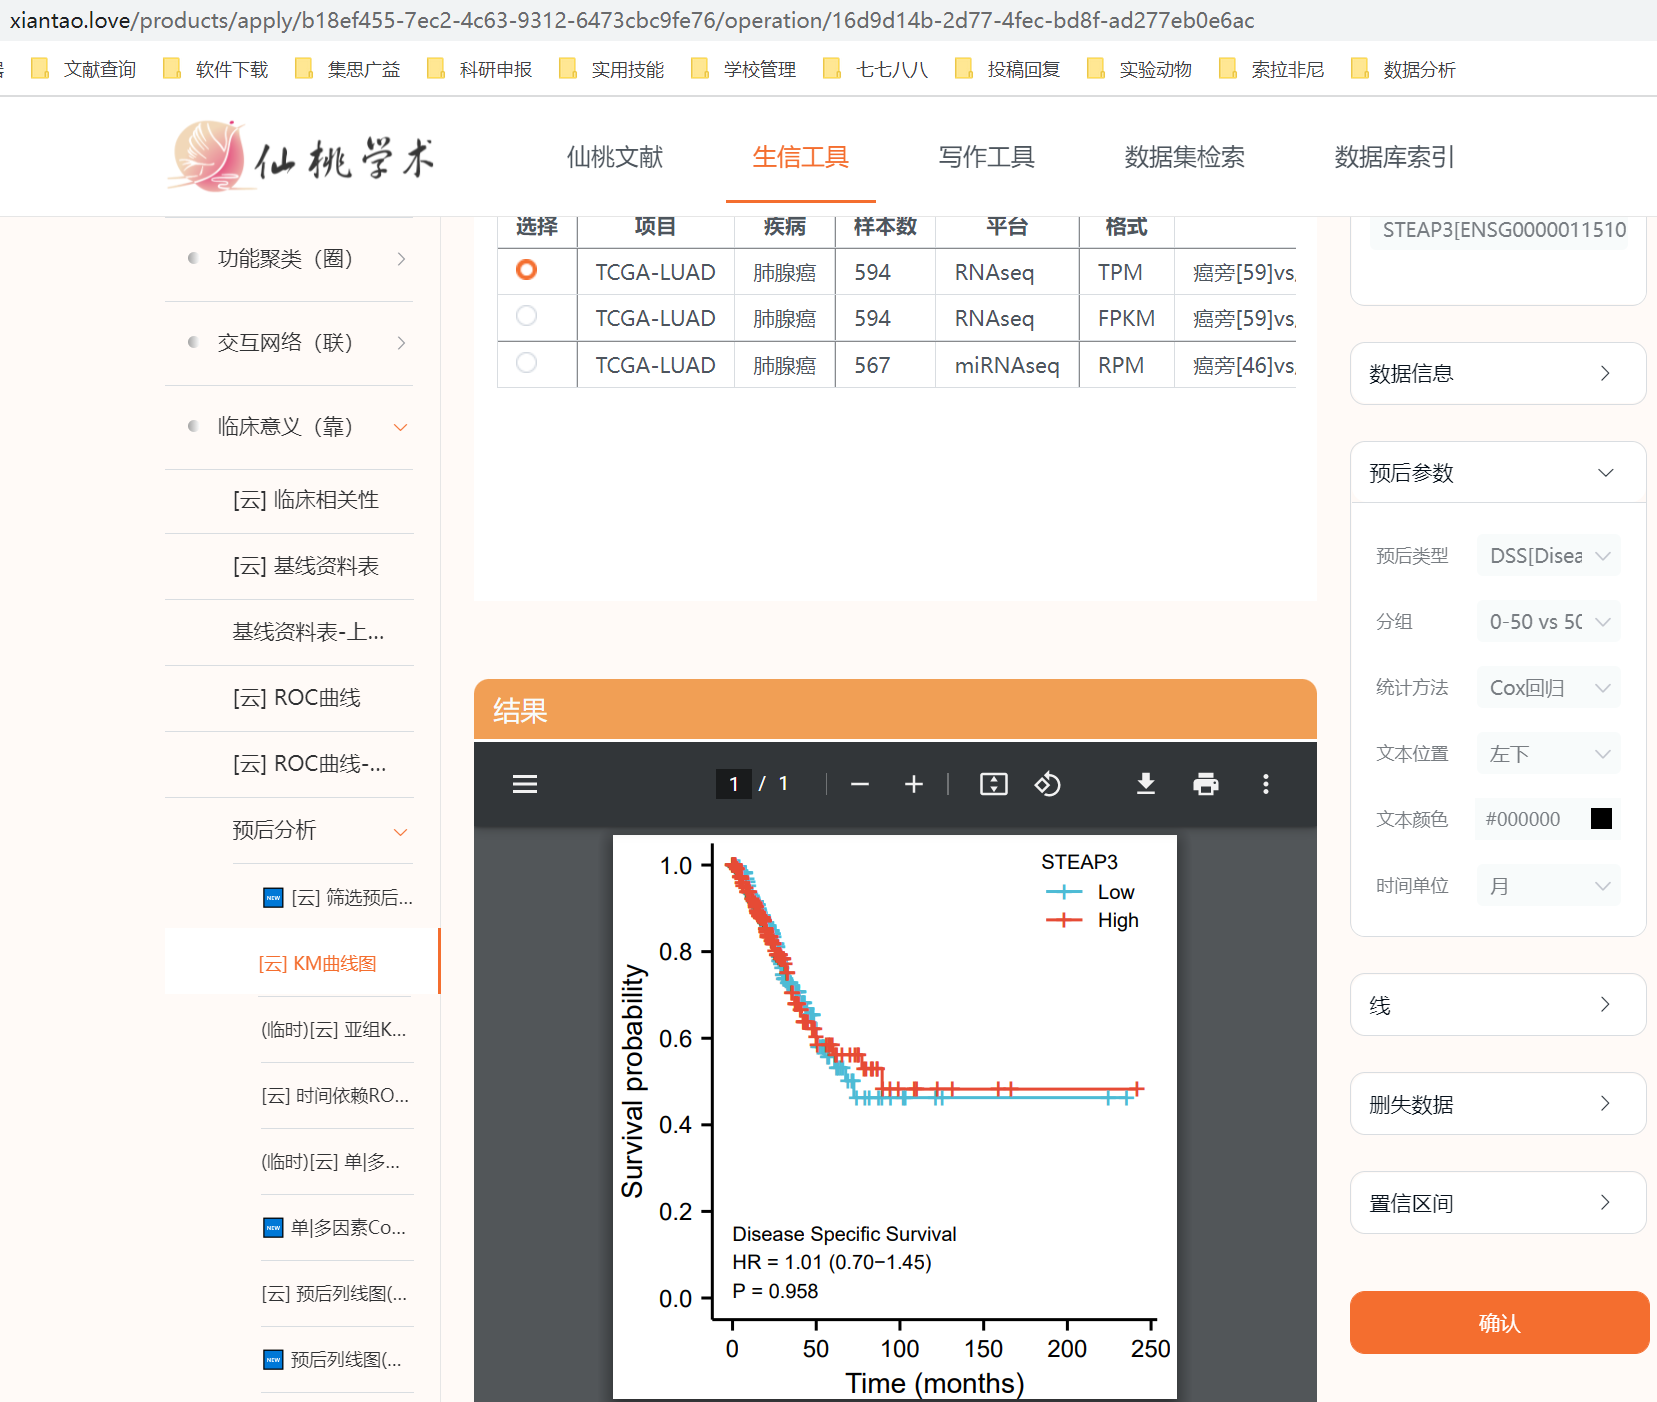


Progression free survival


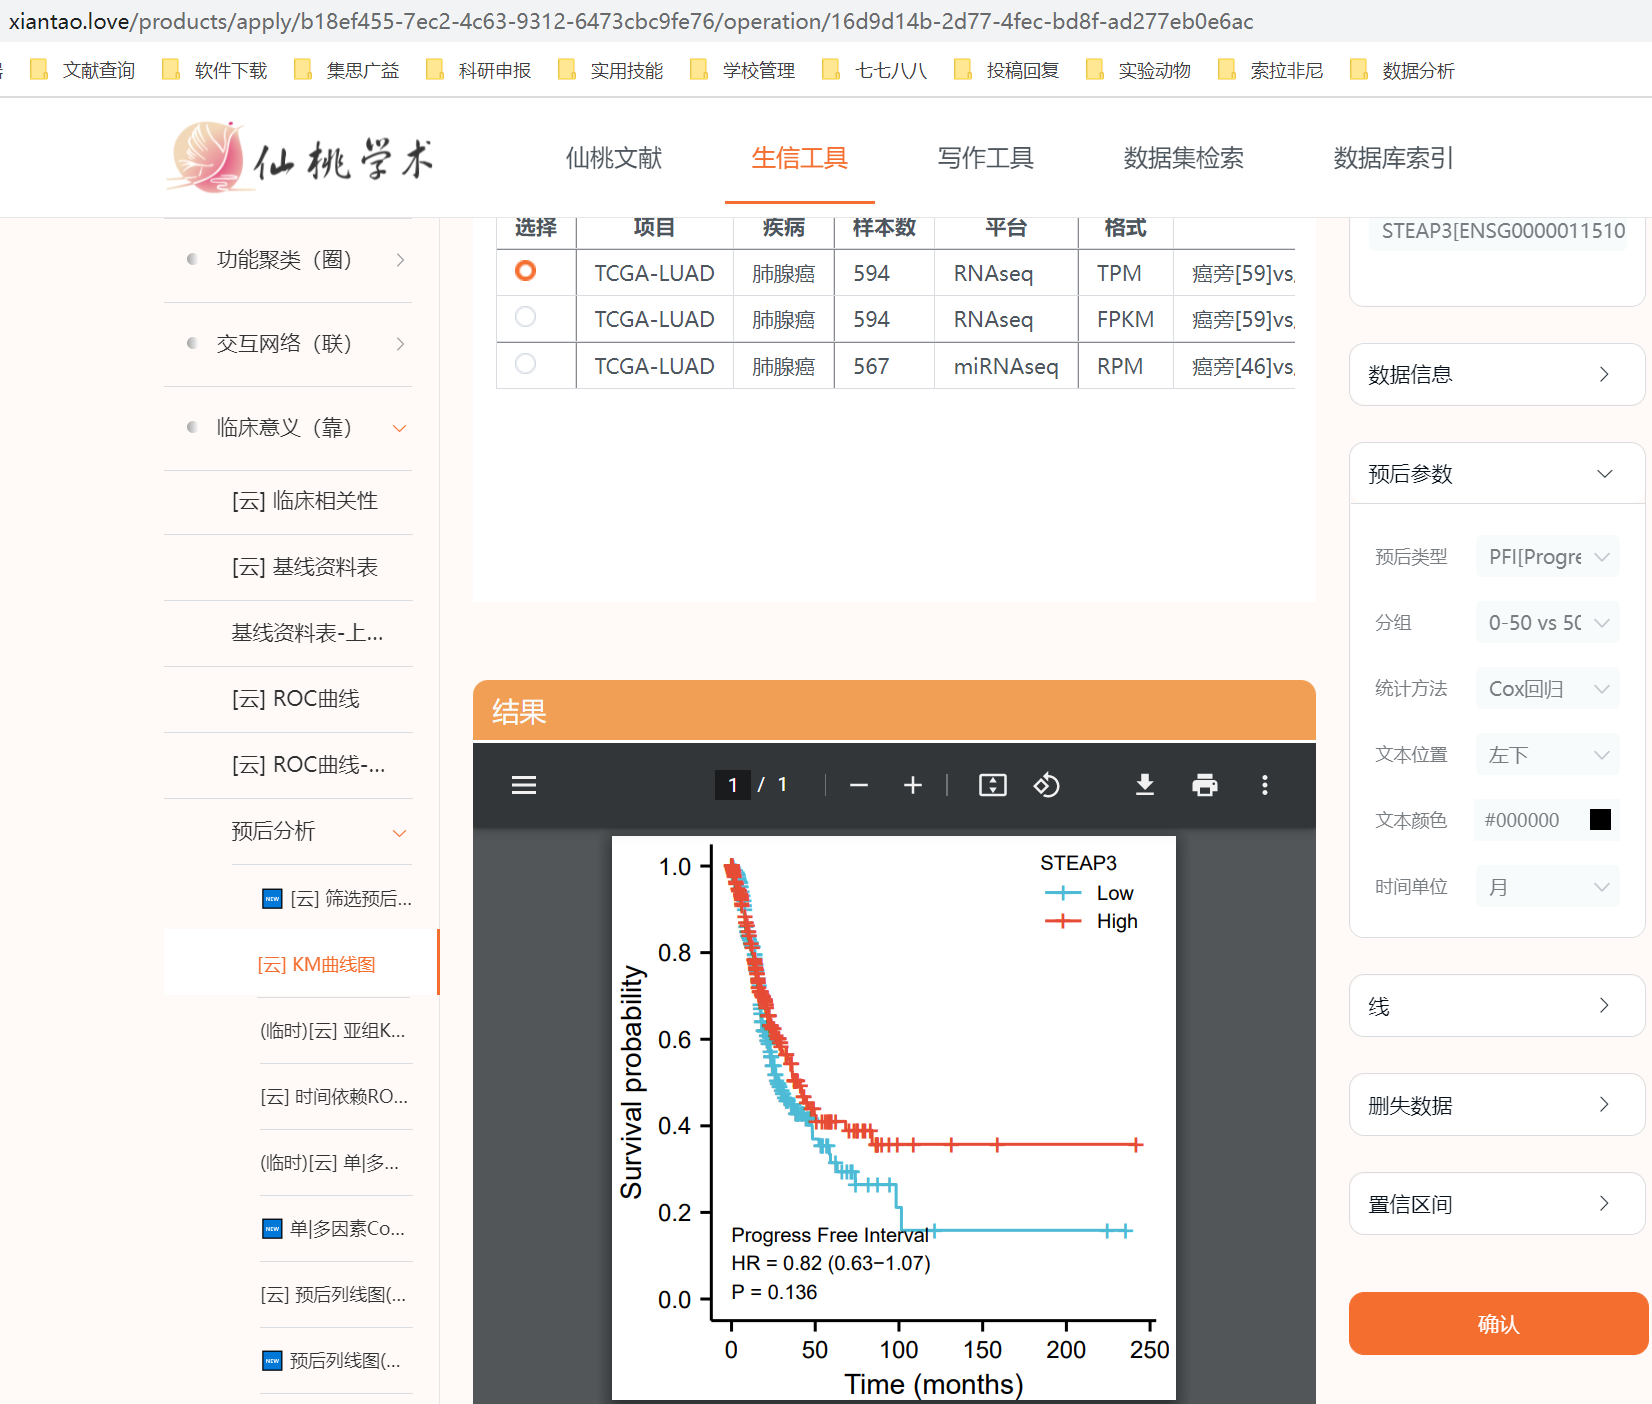


Figure 2D:

Overall survival


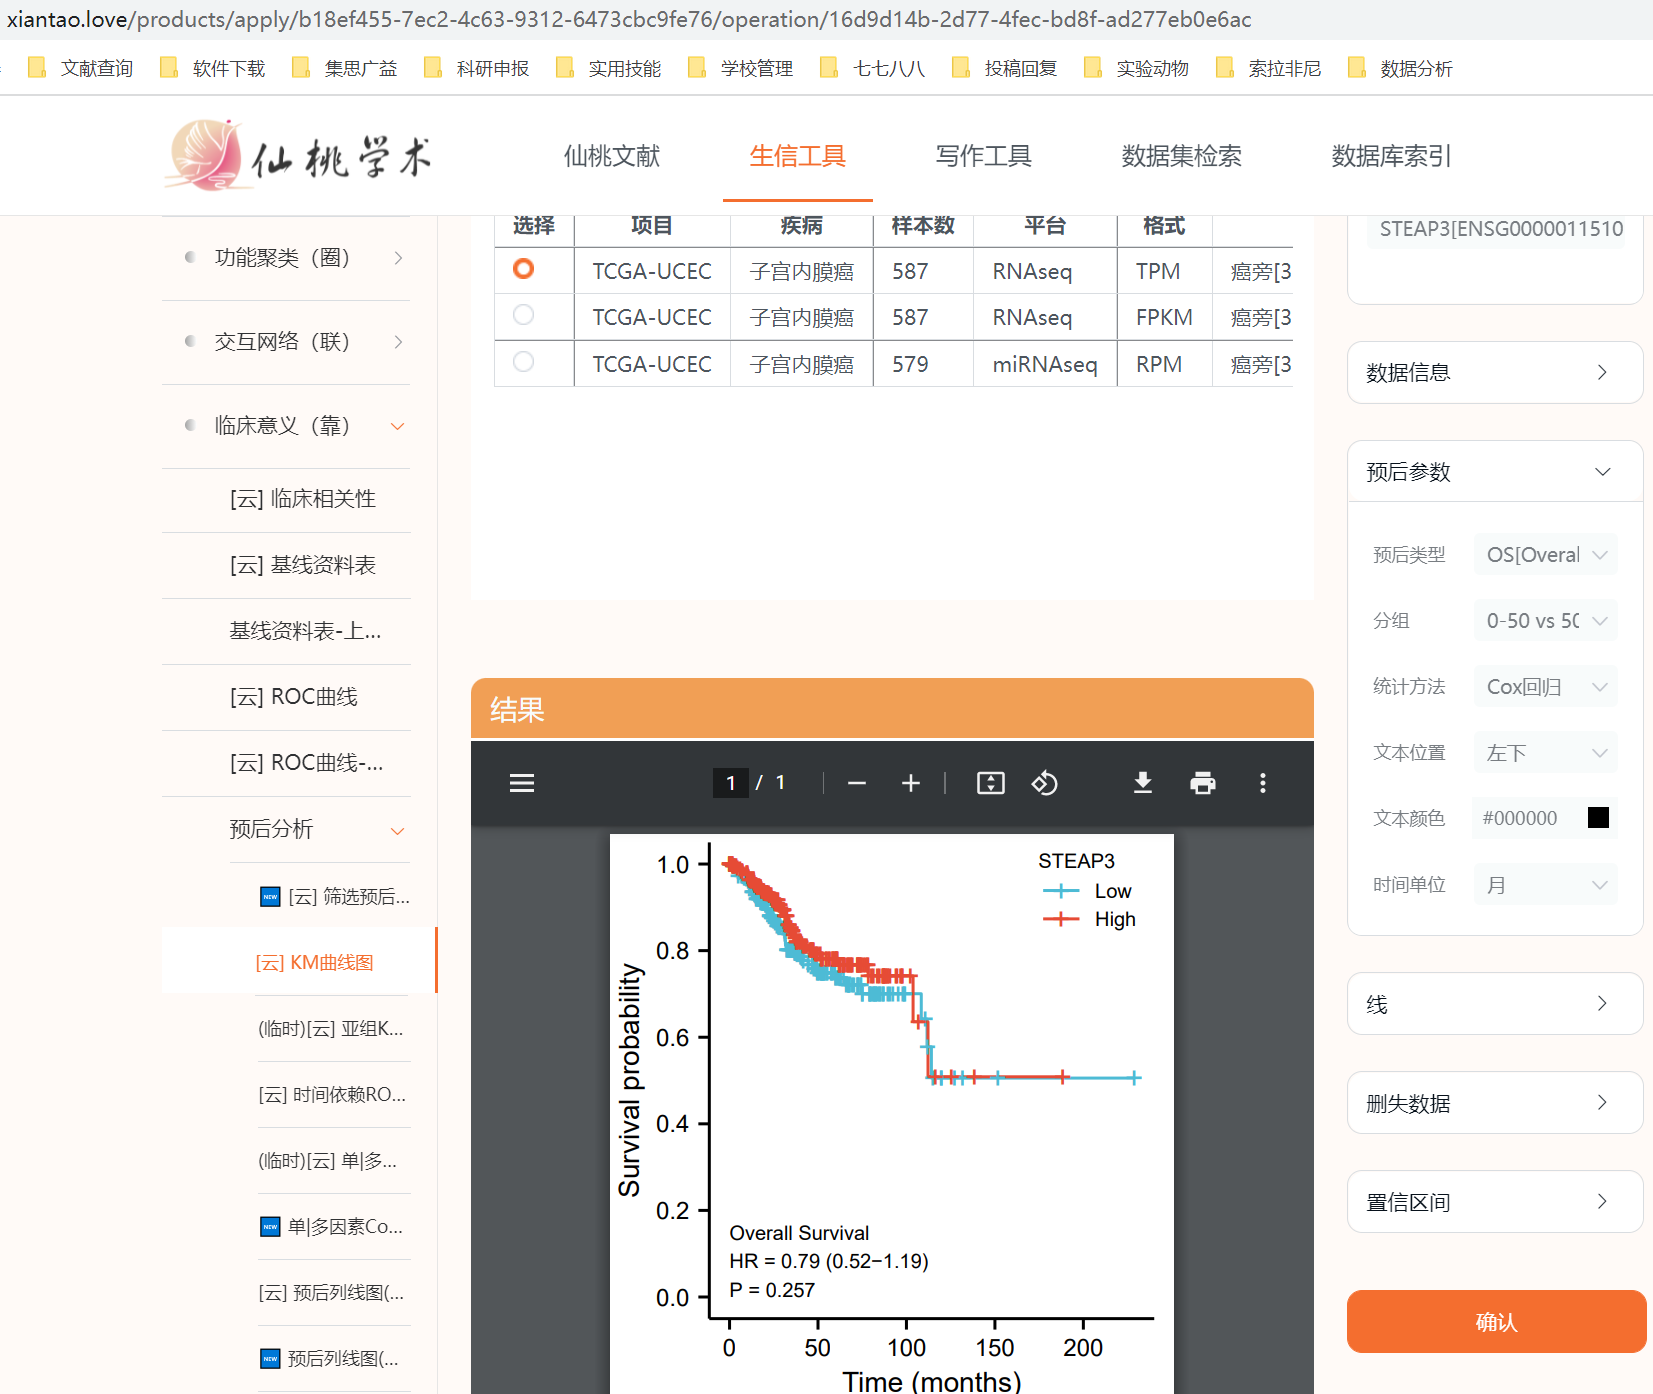


Disease specific survival


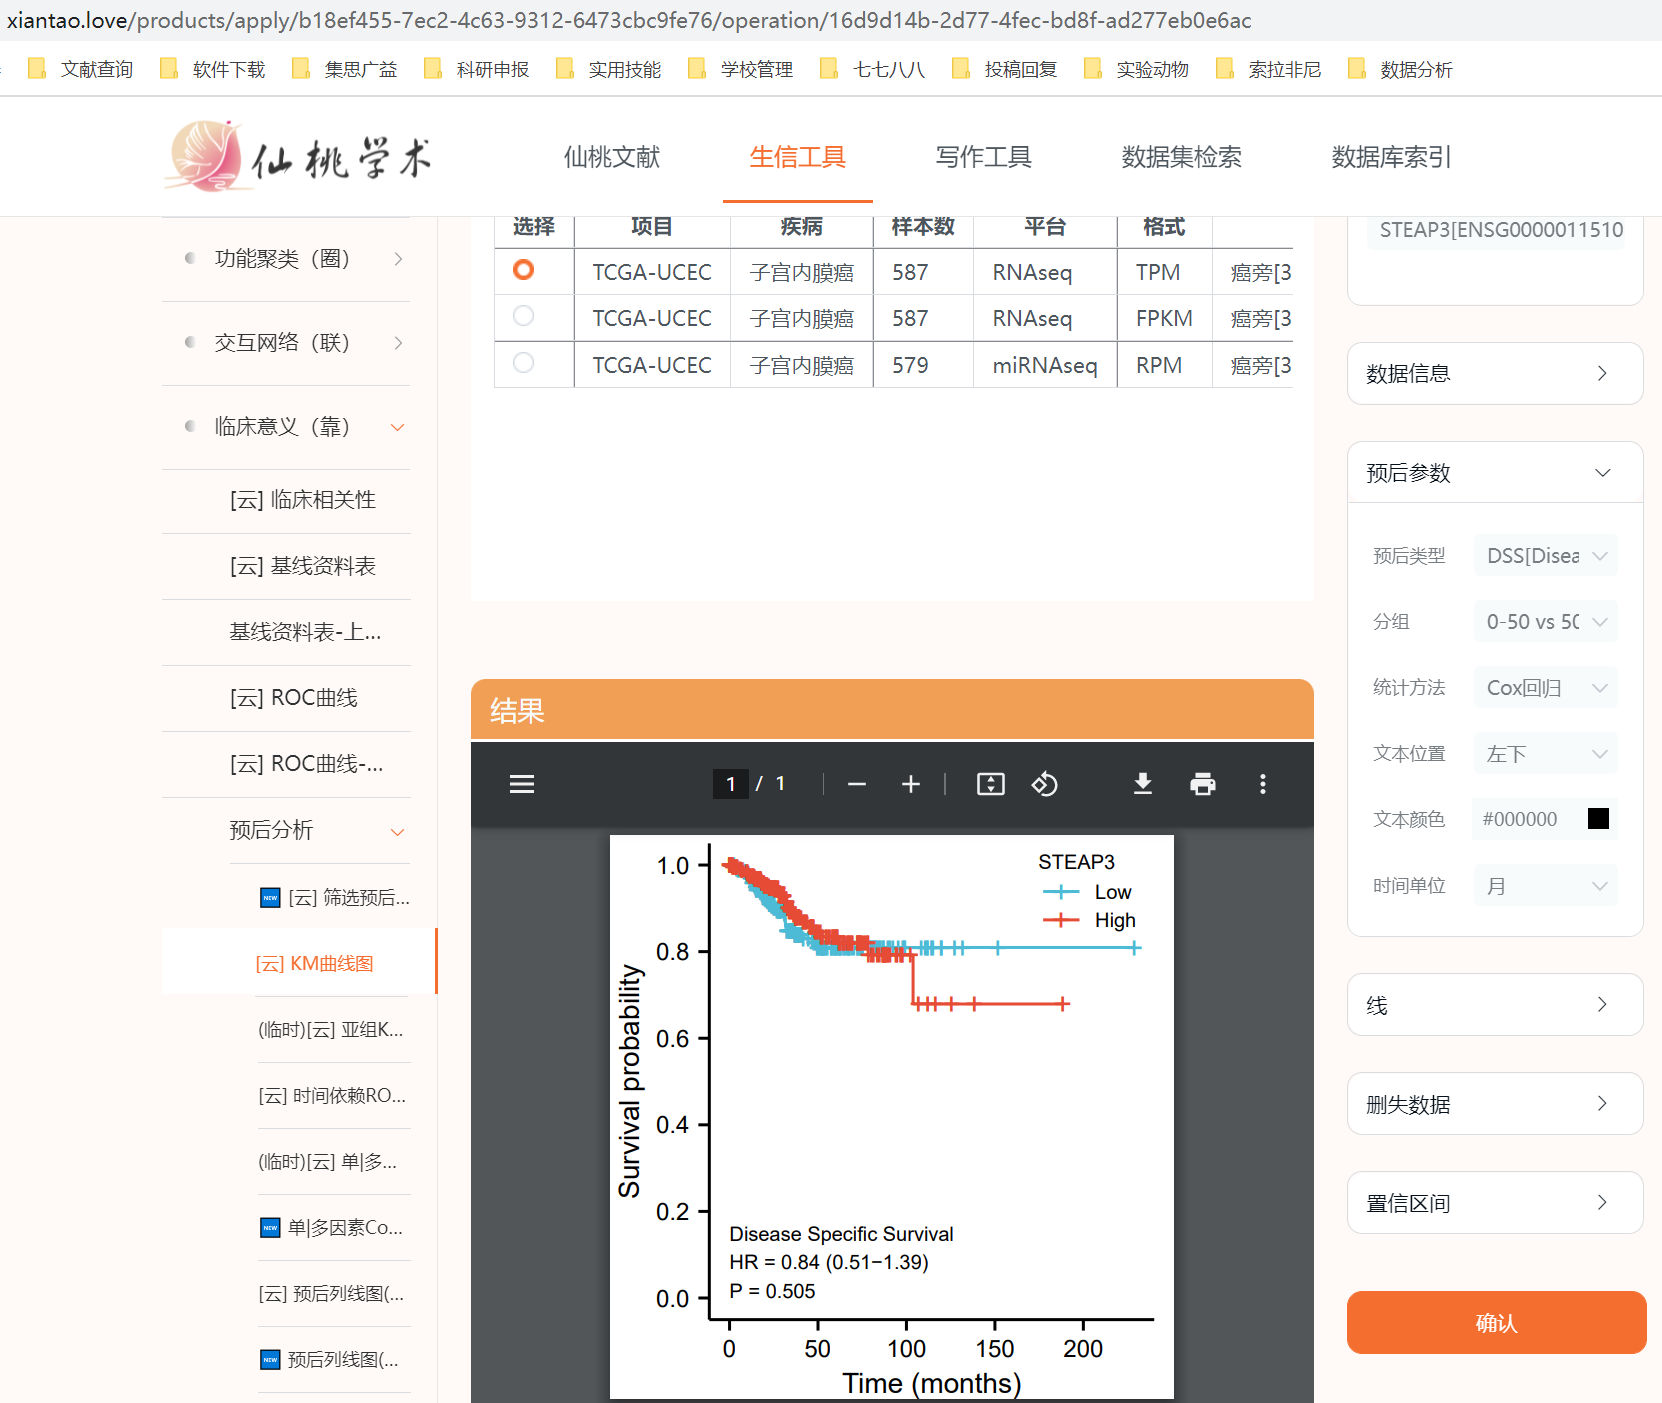


Progression free survival


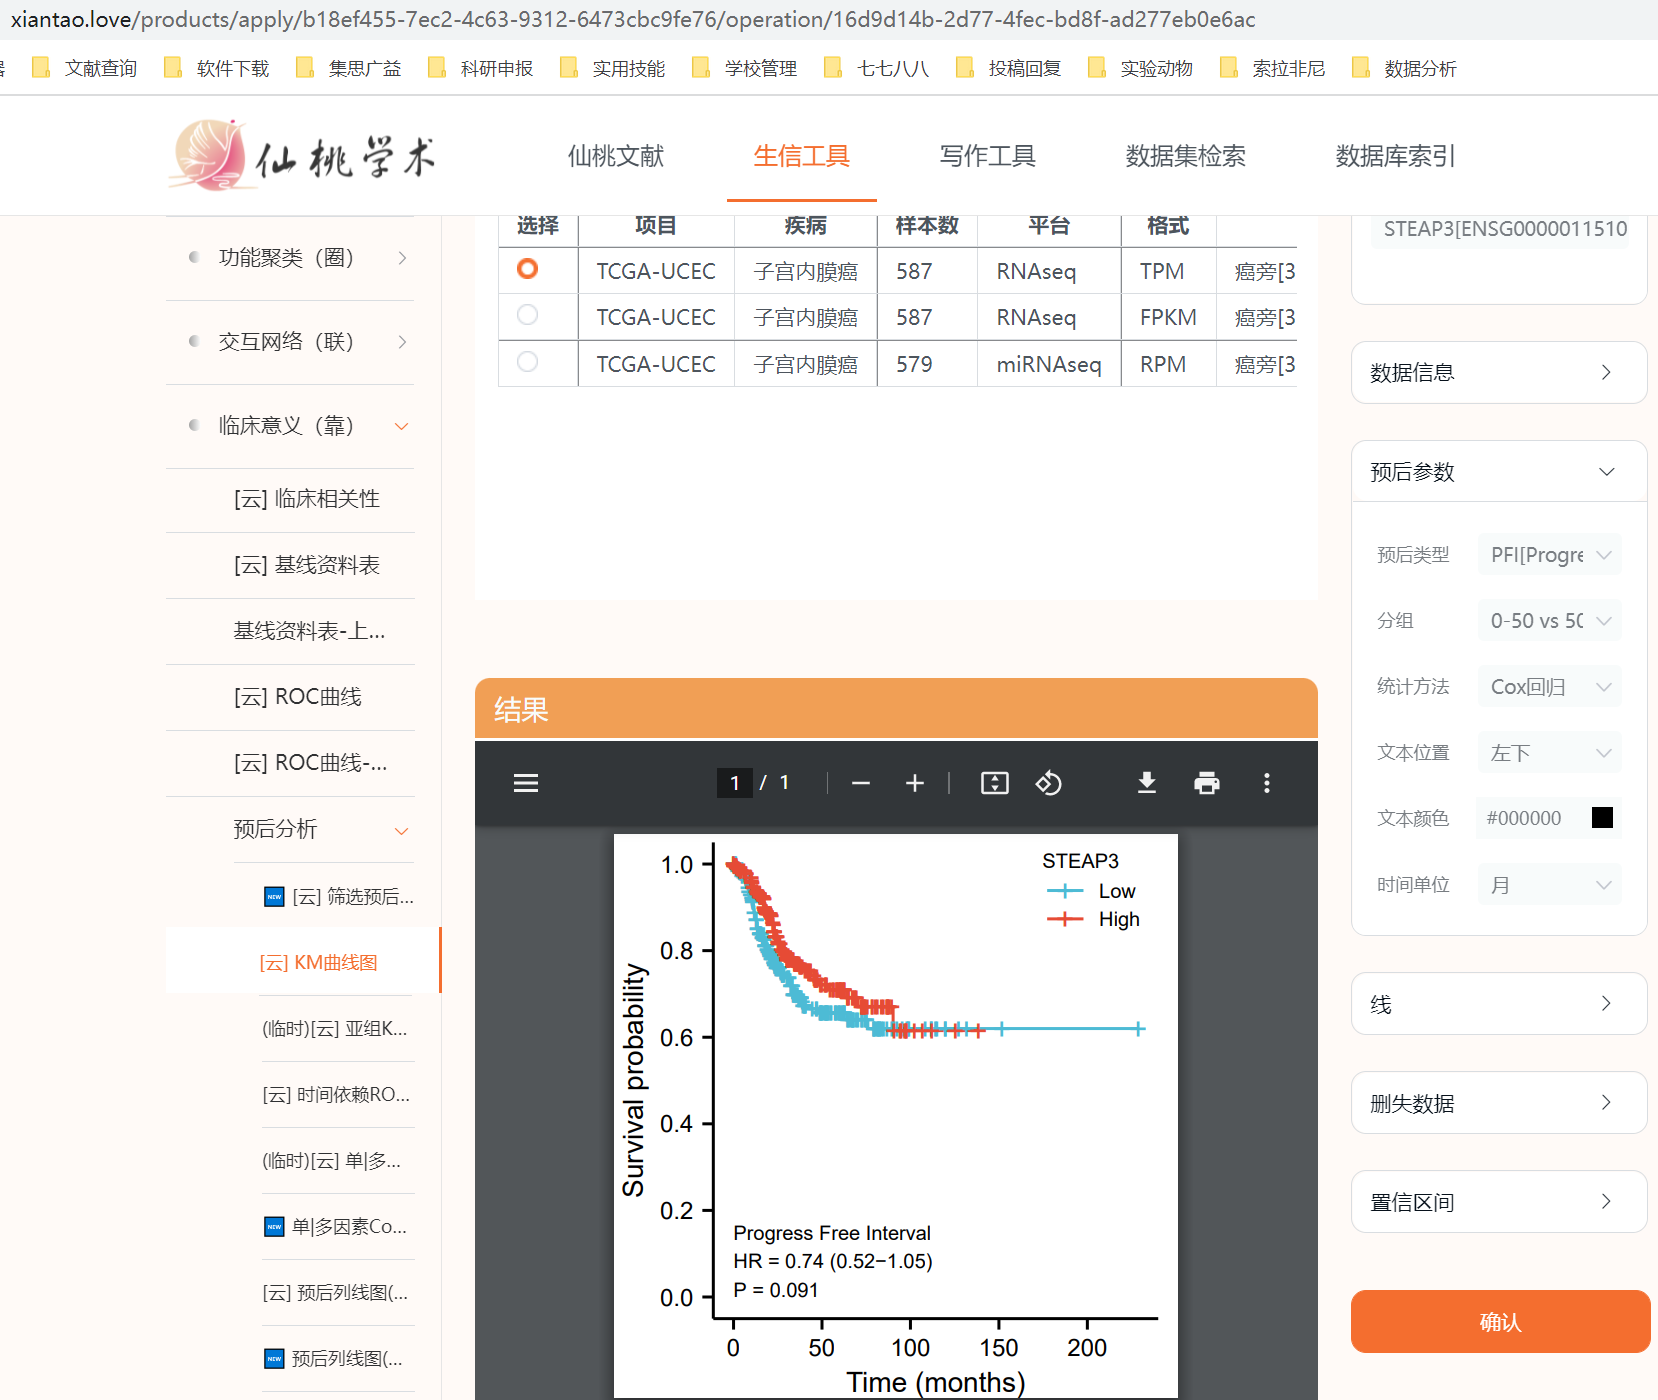

Supplement: raw_data_for_Figure_2.zip [file raw_data_for_Figure_2.zip]
