# Supplementary material for: High expression of six-transmembrane epithelial antigen of prostate 3 promotes the migration and invasion and predicts unfavorable prognosis in glioma
Source: PeerJ journal article supplement (doi:10.7717/peerj.15136), 2023-03-28

Figure 3A-H:

<http://www.cgga.org.cn/analyse/RNA-data-expression-distribution-result.jsp>


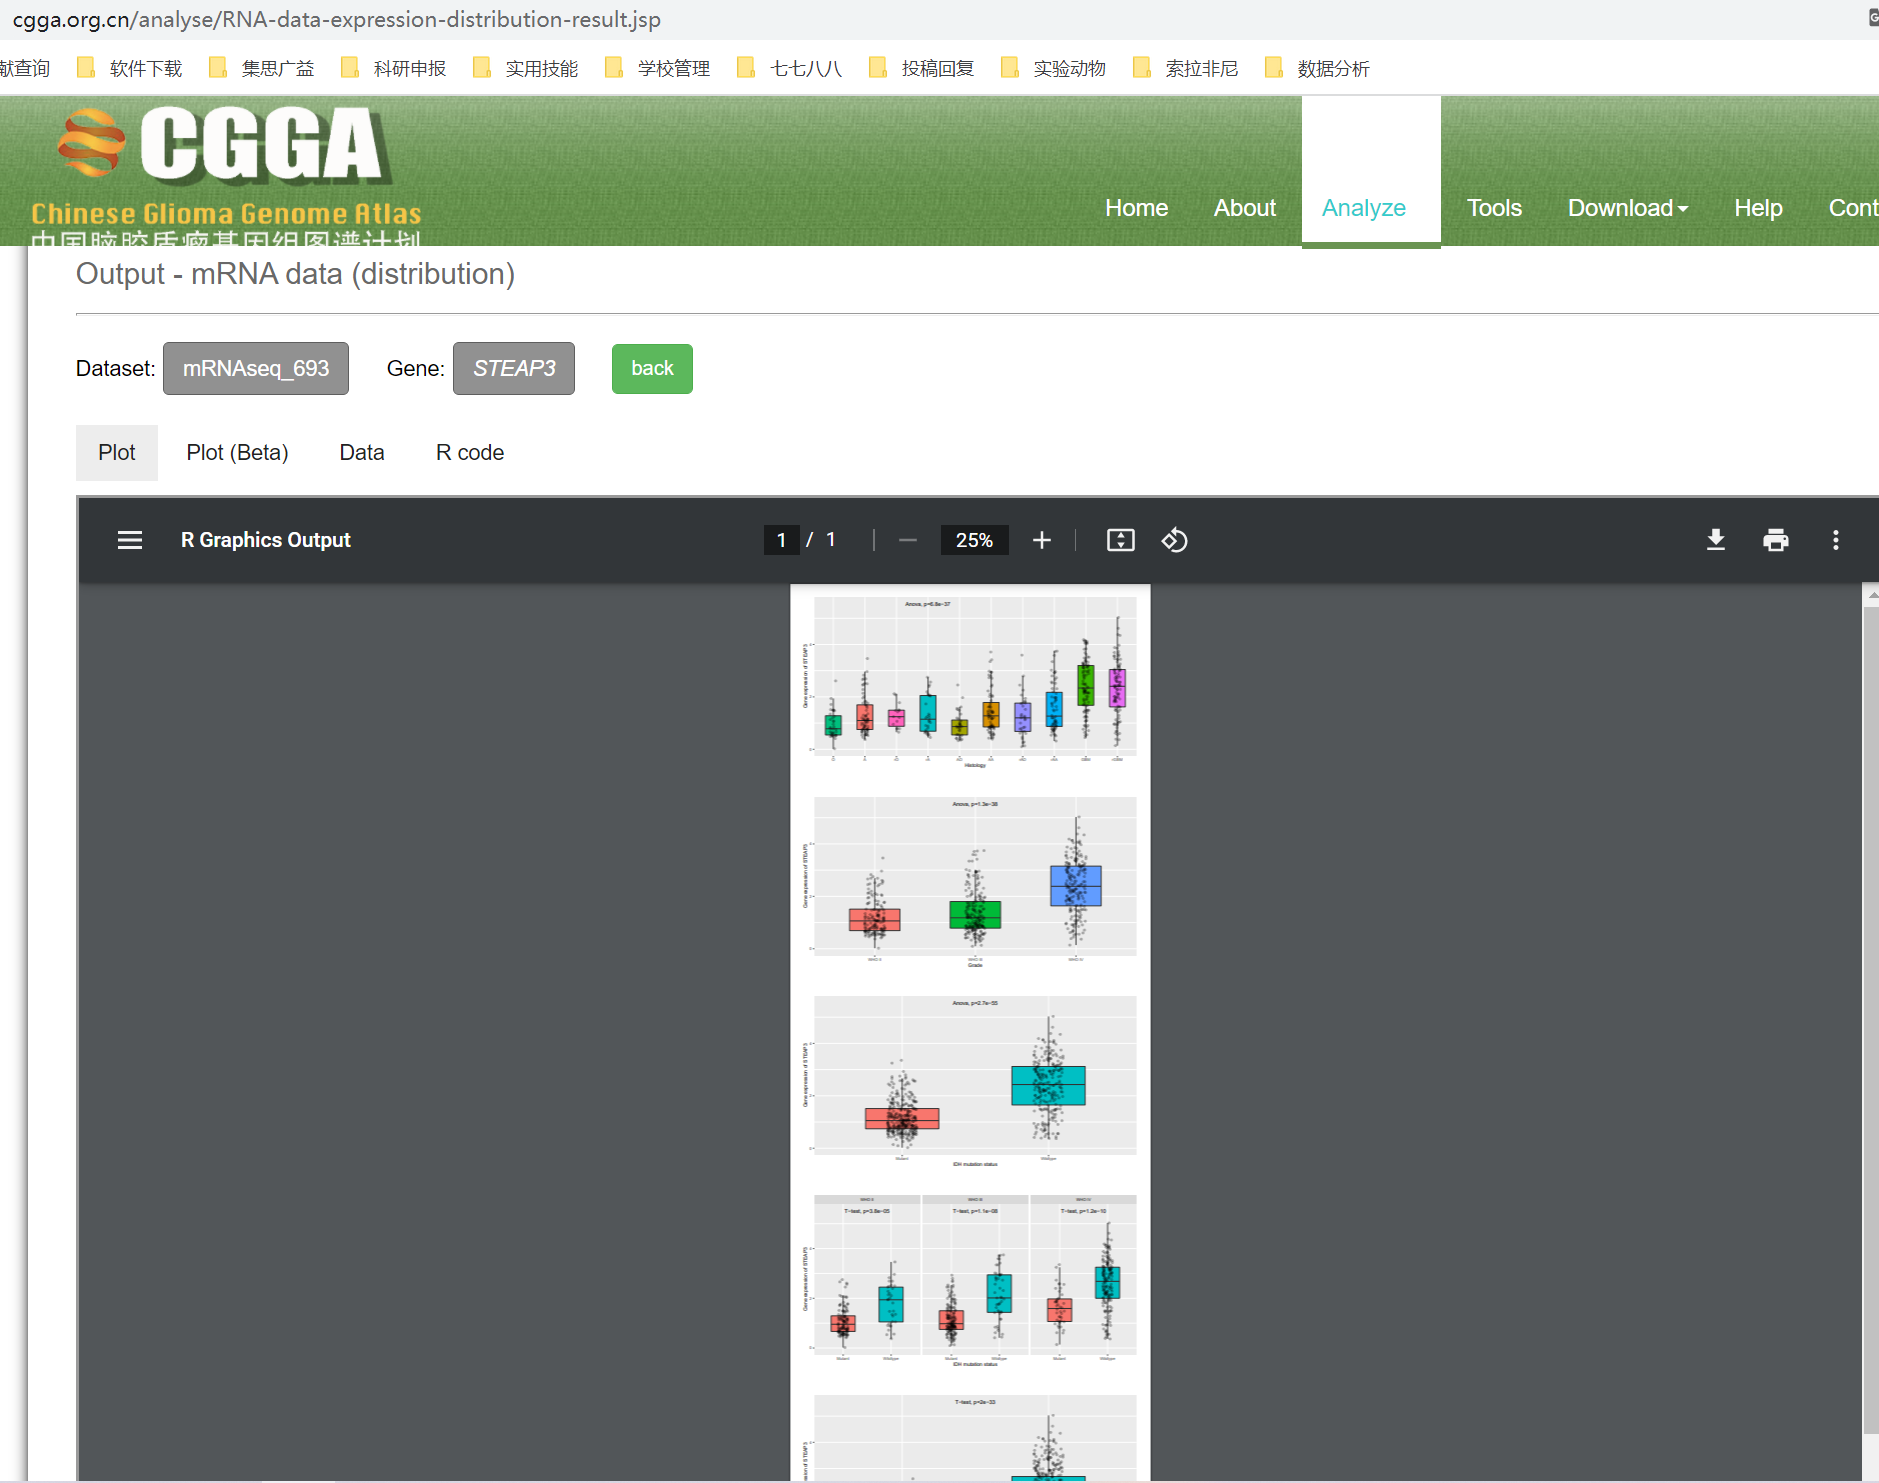


Figure 3I-J:

<http://www.cgga.org.cn/analyse/RNA-data-survival-result.jsp>


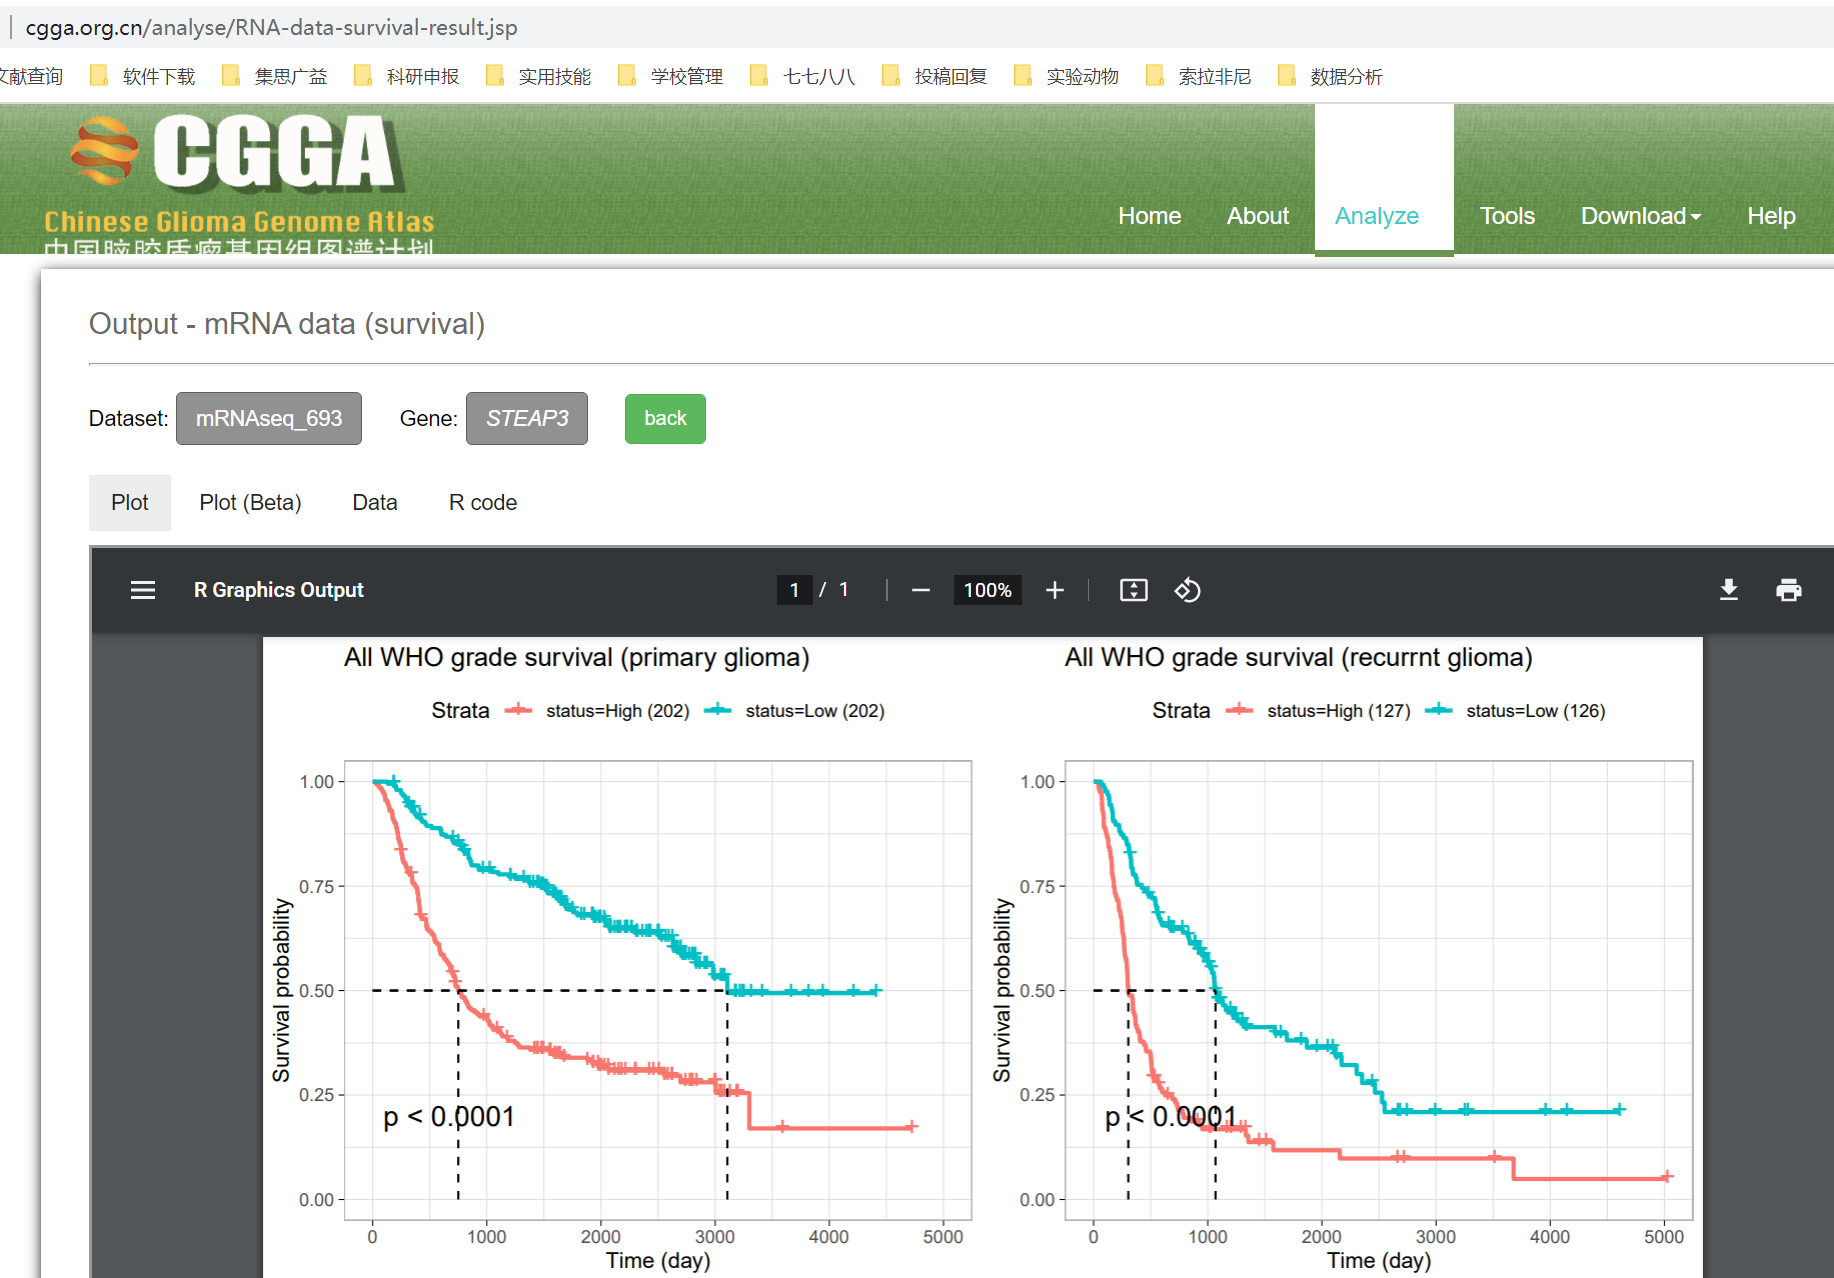

Supplement: raw_data_for_Figure_3.zip [file raw_data_for_Figure_3.zip]
