# Supplementary material for: High expression of six-transmembrane epithelial antigen of prostate 3 promotes the migration and invasion and predicts unfavorable prognosis in glioma
Source: PeerJ journal article supplement (doi:10.7717/peerj.15136), 2023-03-28

Figure 4A-B:

<http://www.cgga.org.cn/analyse/Methyl-data-distribution-result.jsp>


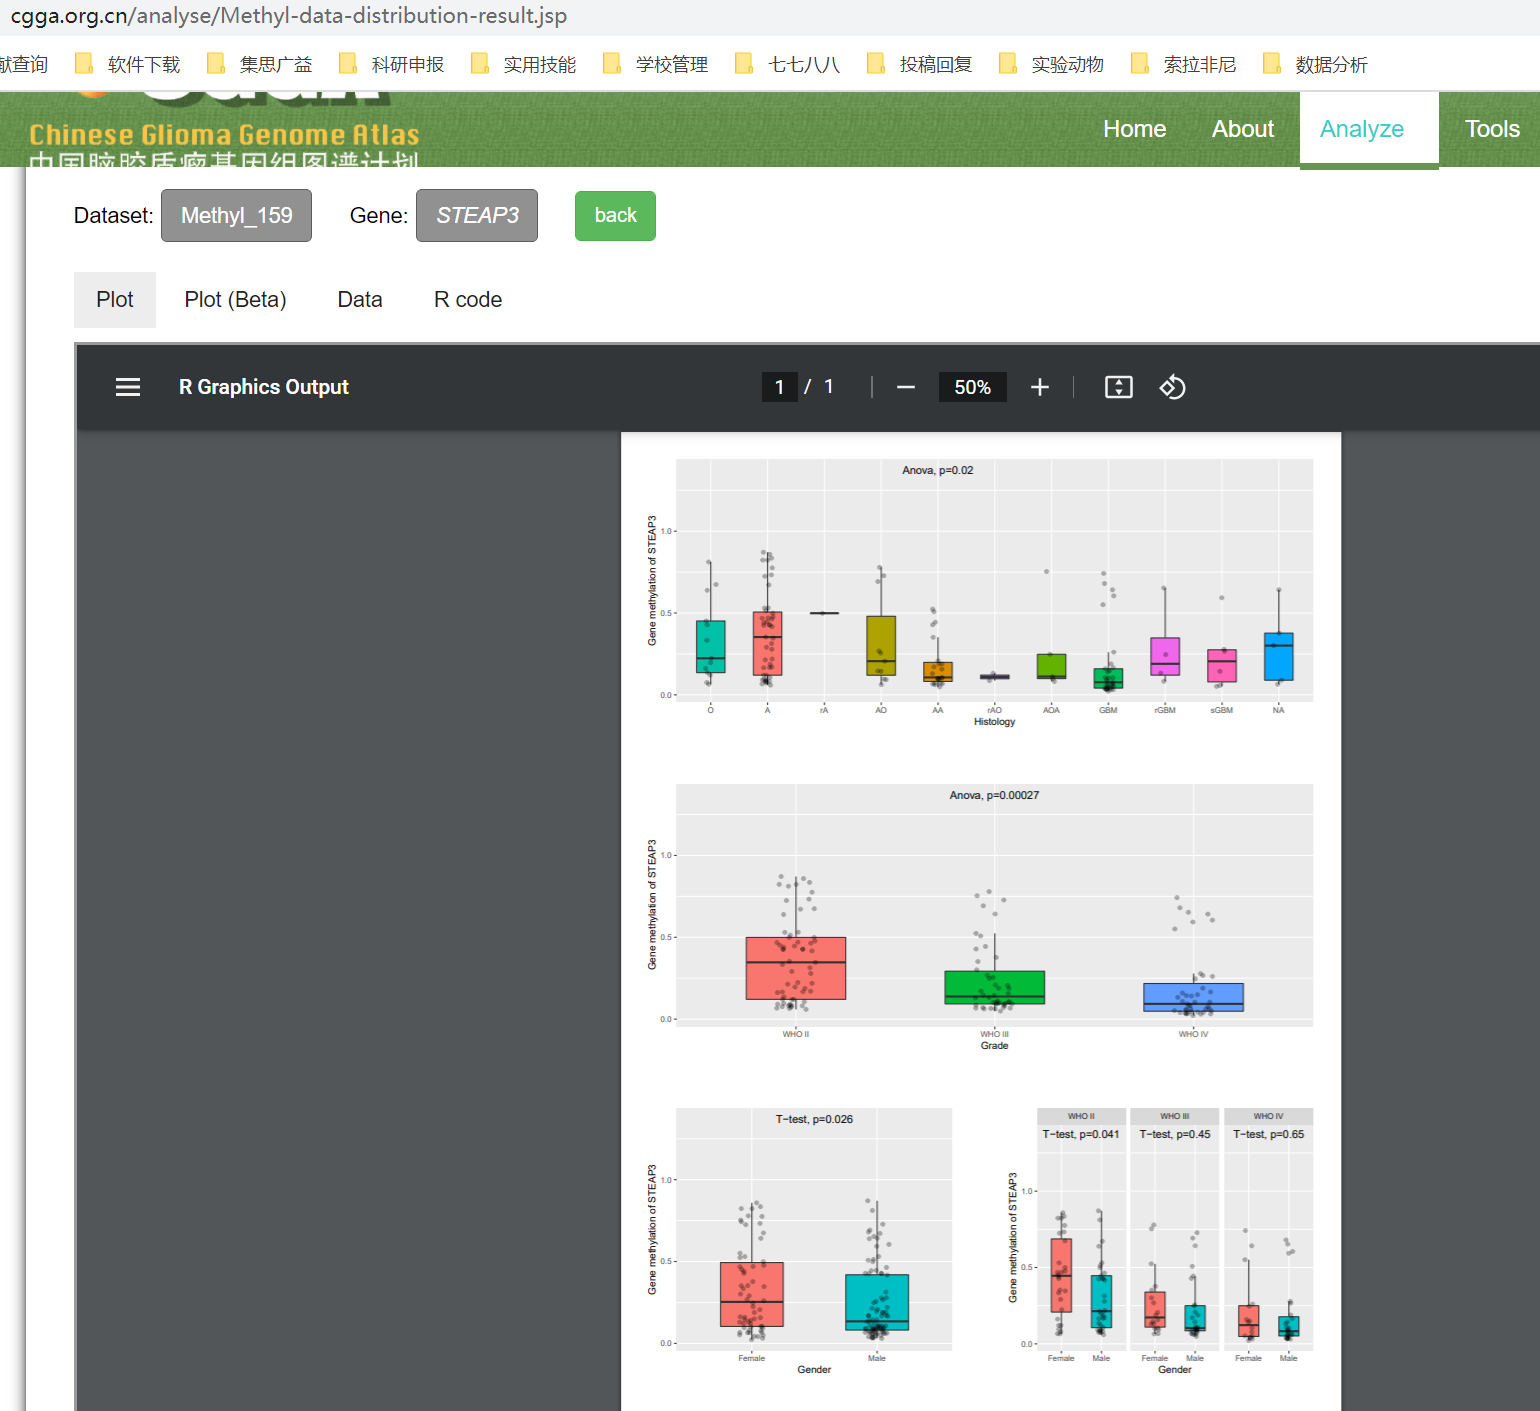


Figure 4C:

<http://www.cgga.org.cn/analyse/Methyl-data-survival-result.jsp>
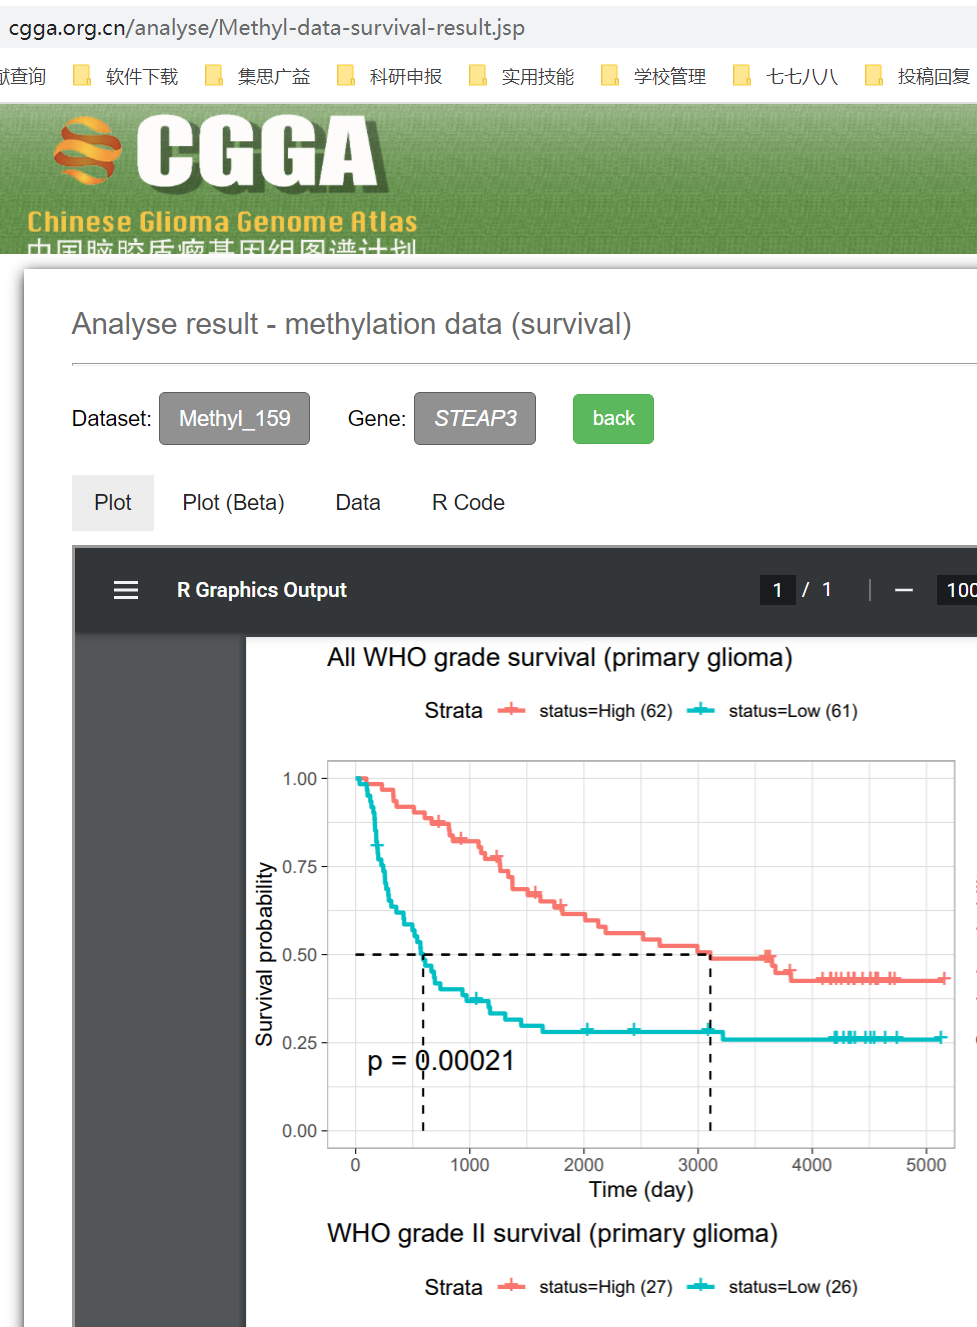


Figure 4D:


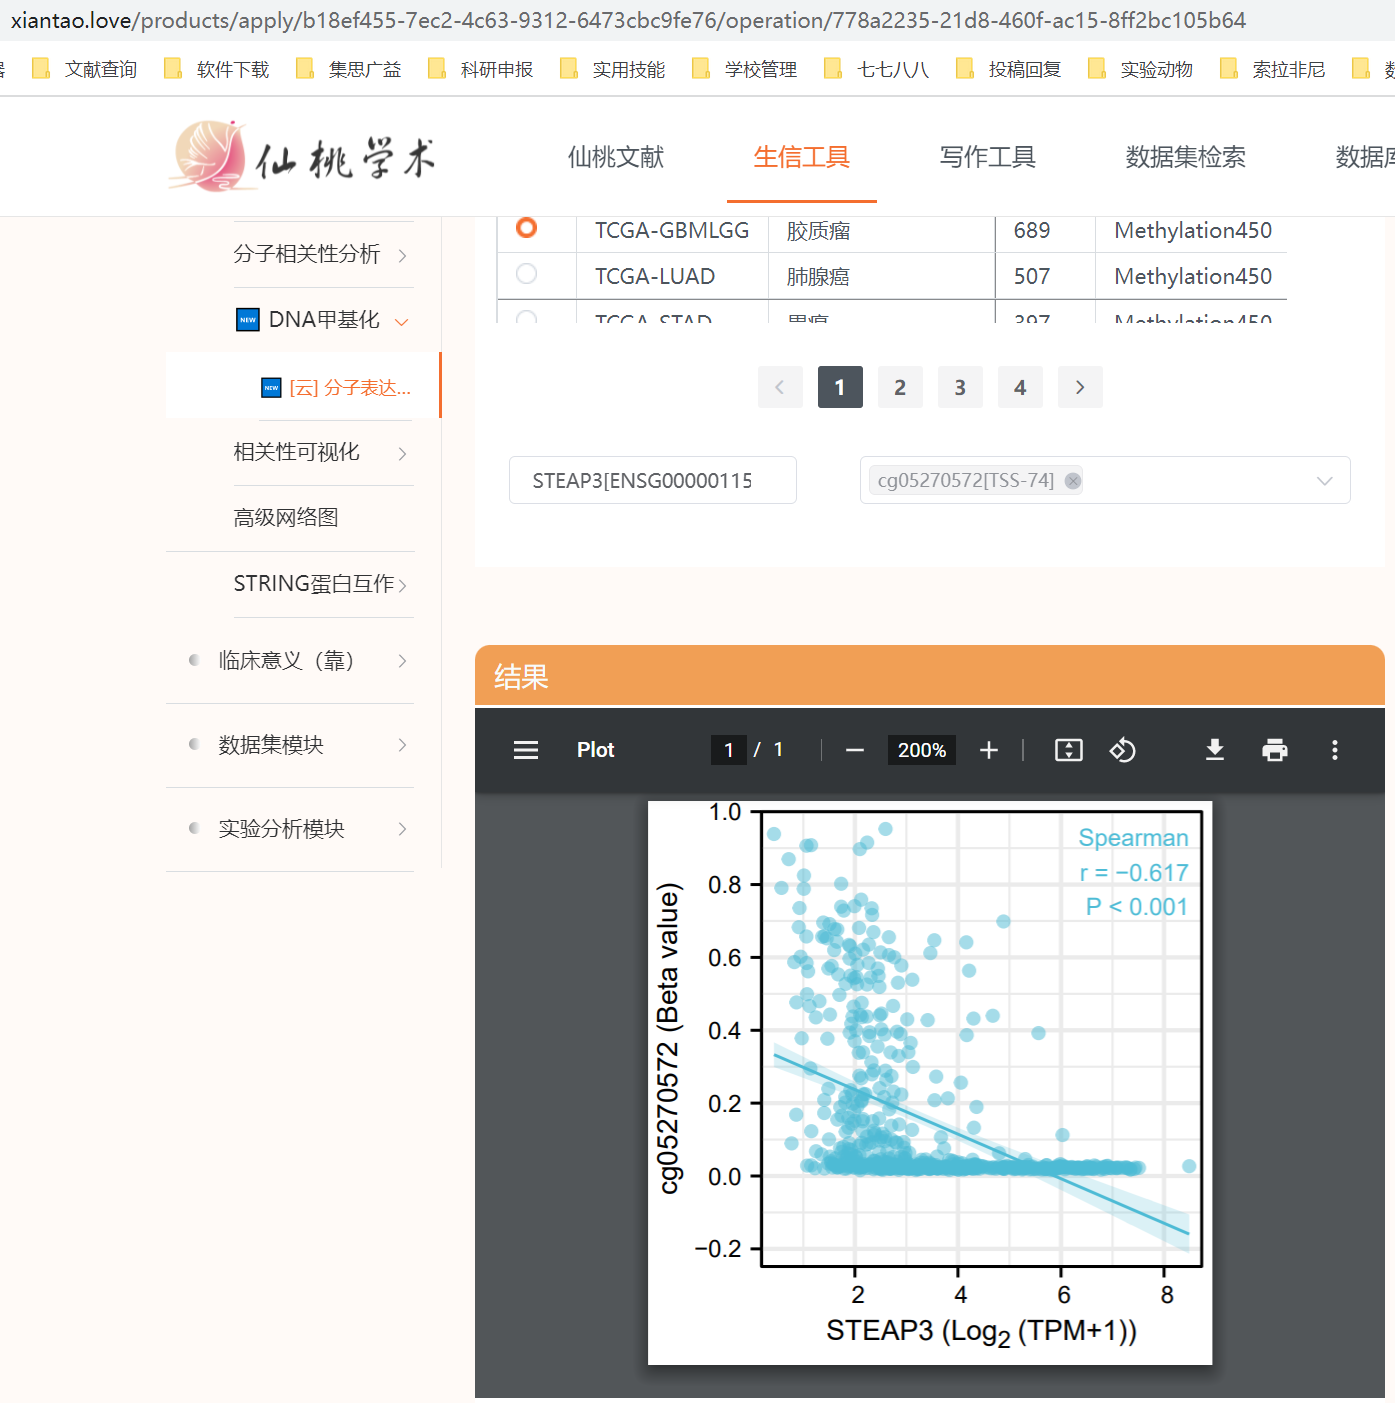


Figure 4E:


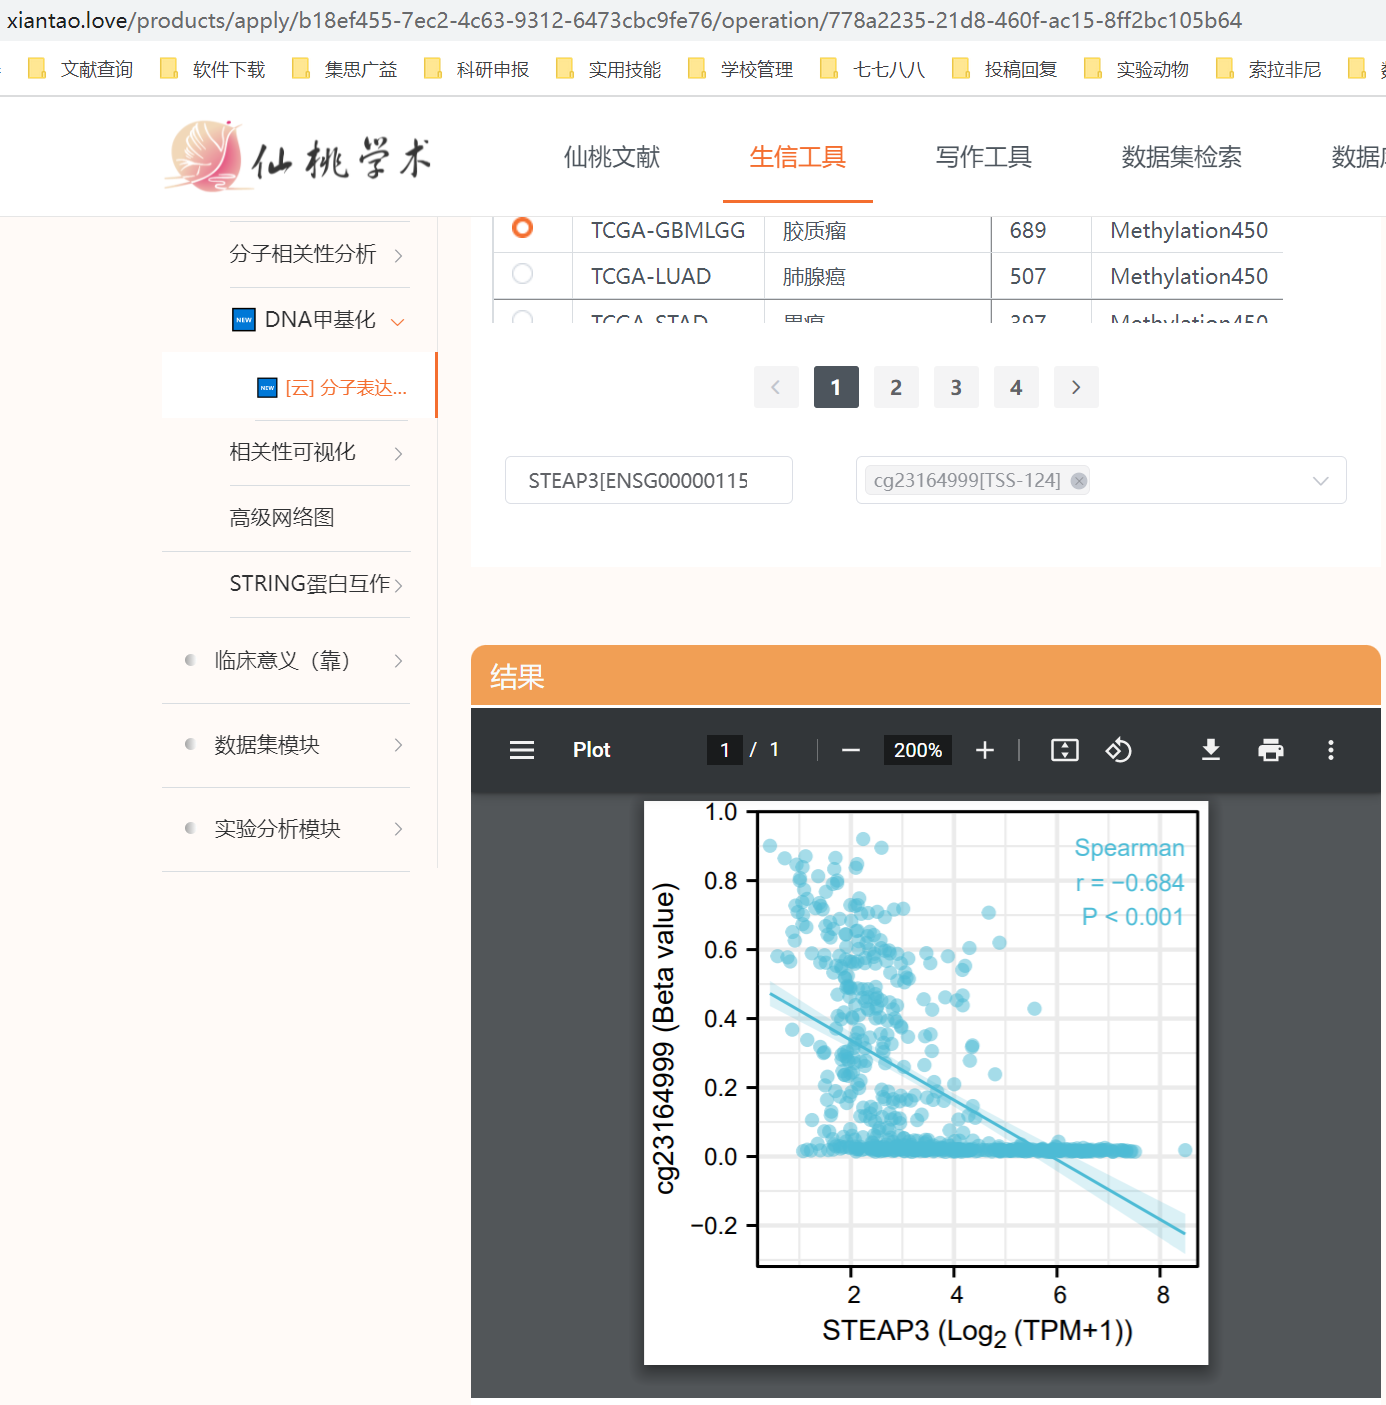


Figure 4F:


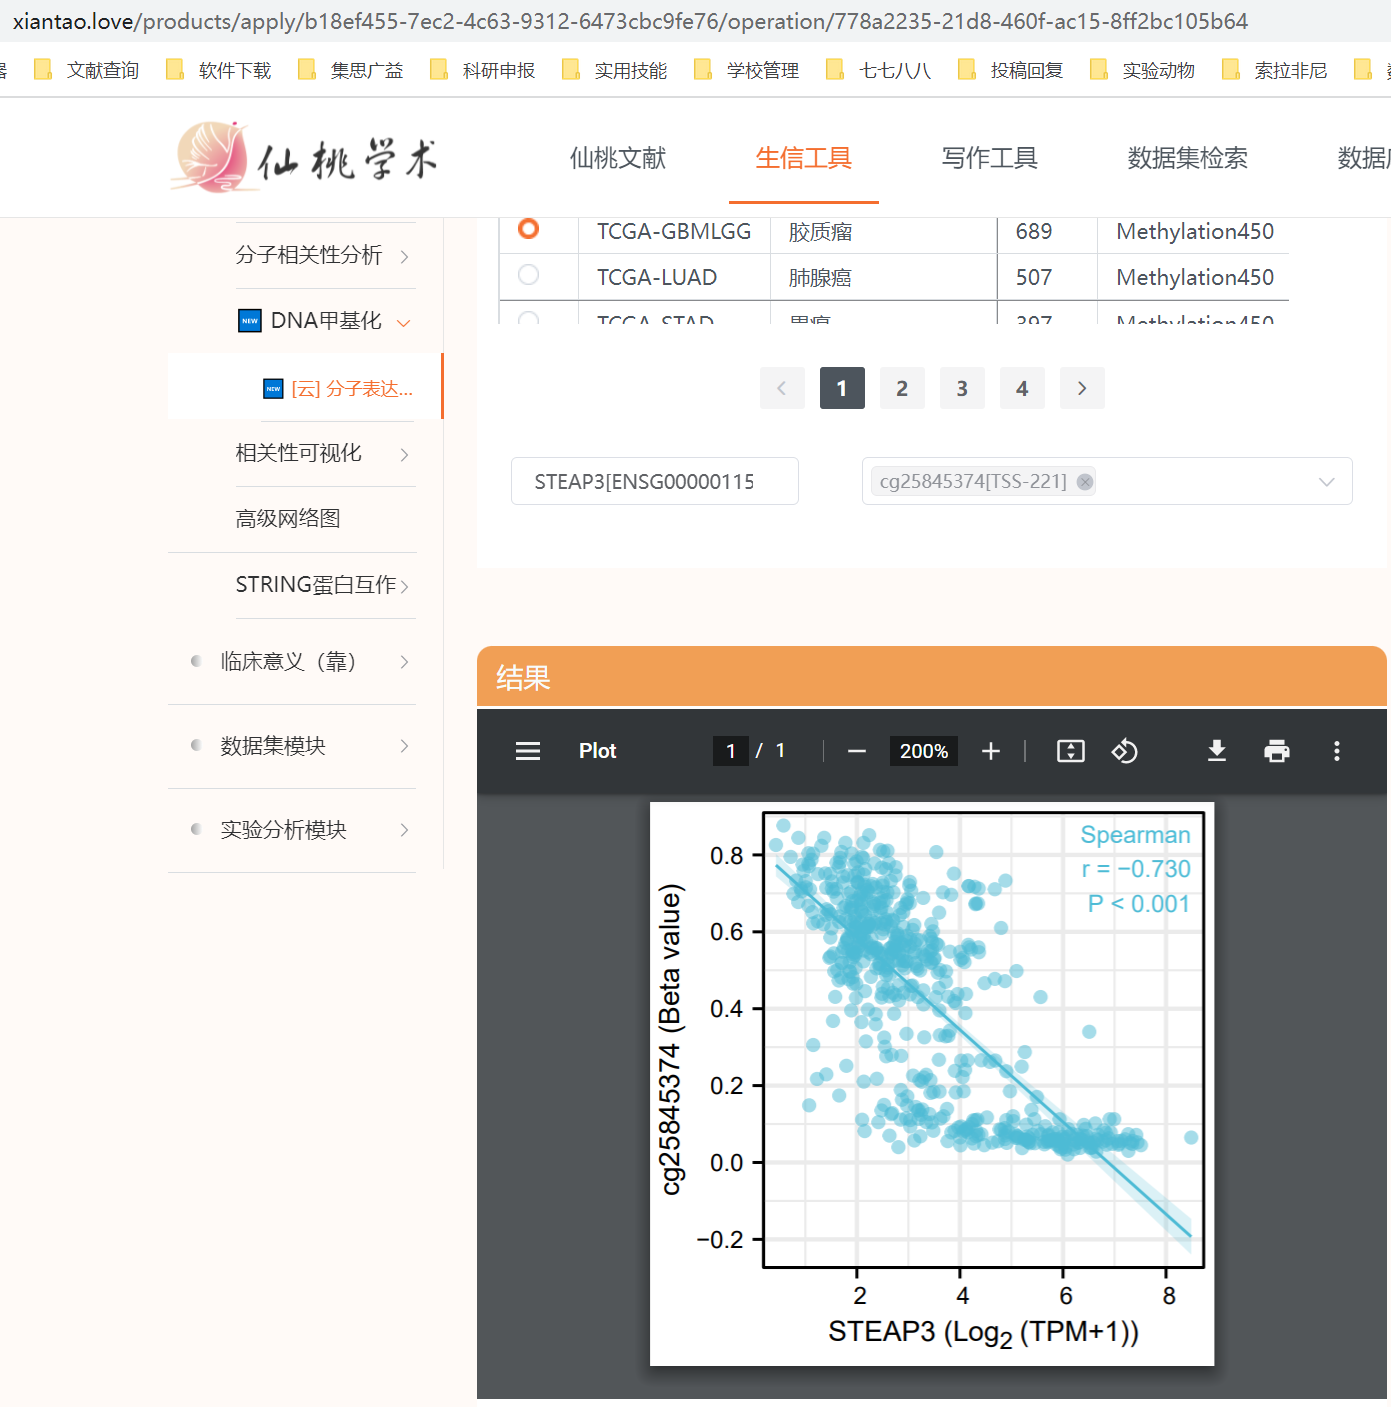


Figure 4G:


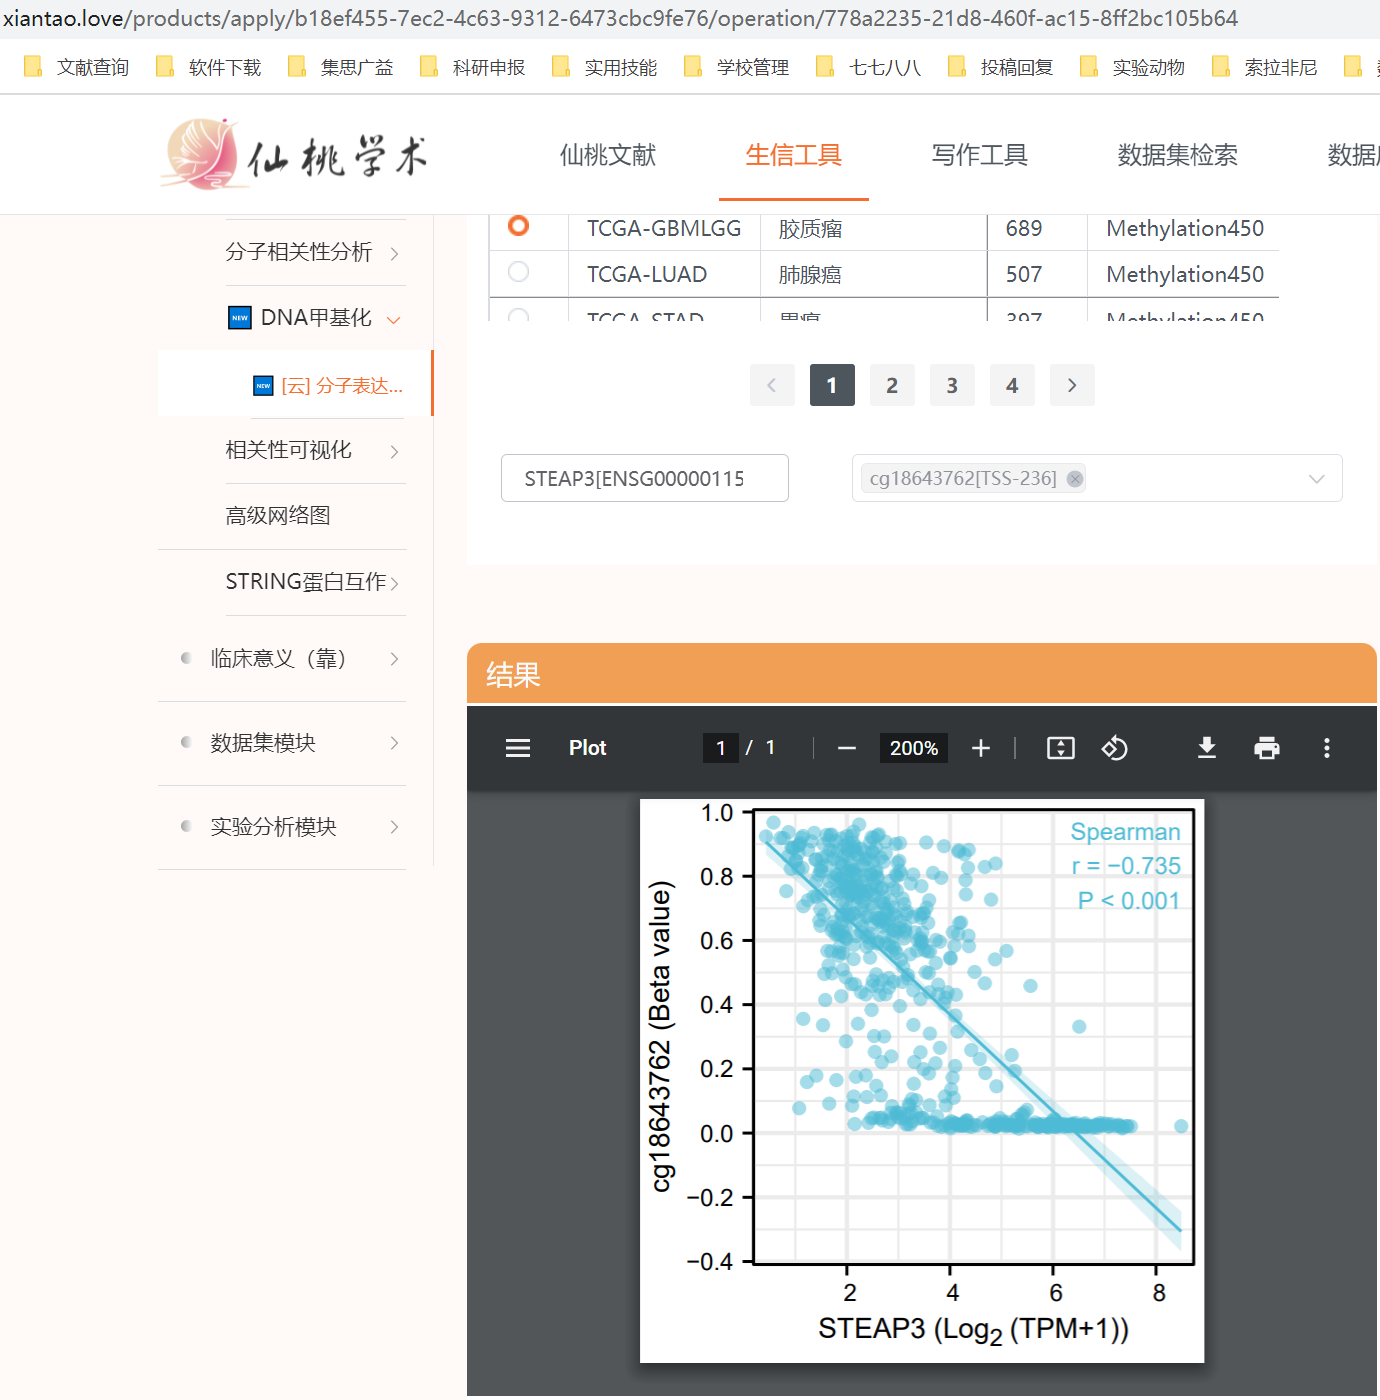


Figure 4H:


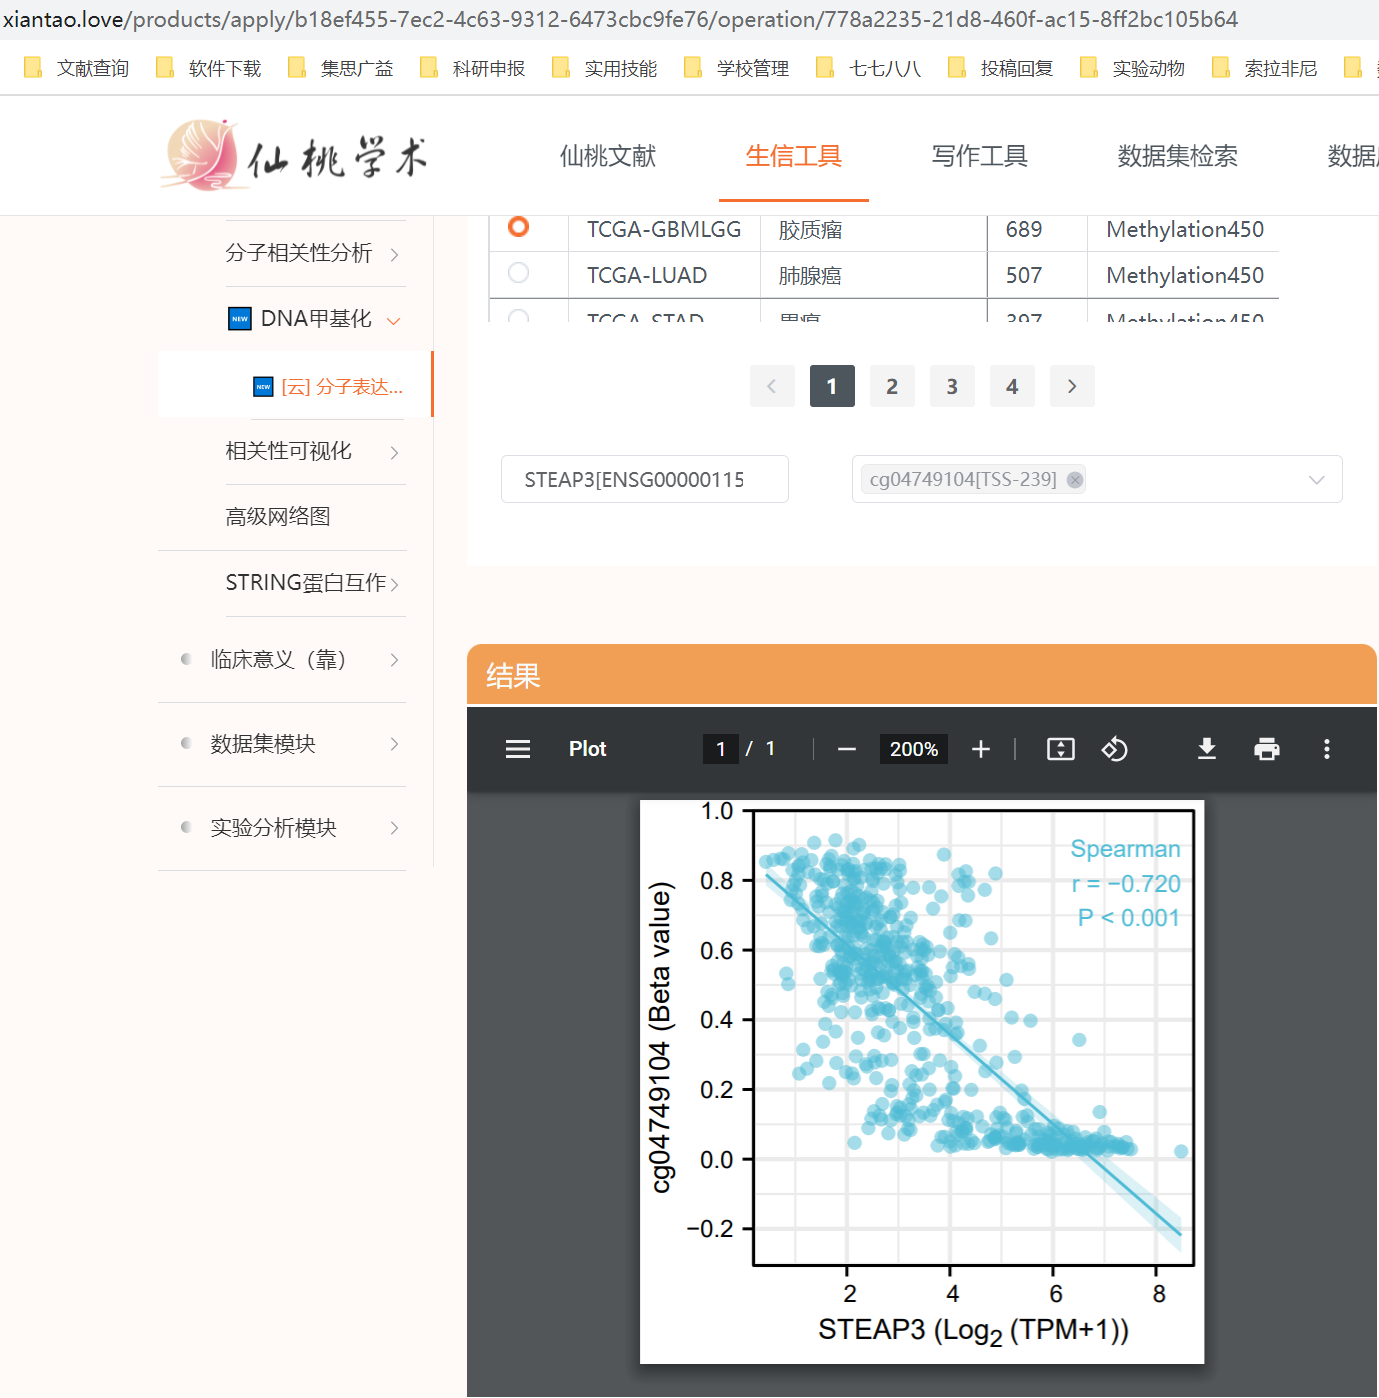


Figure 4I:


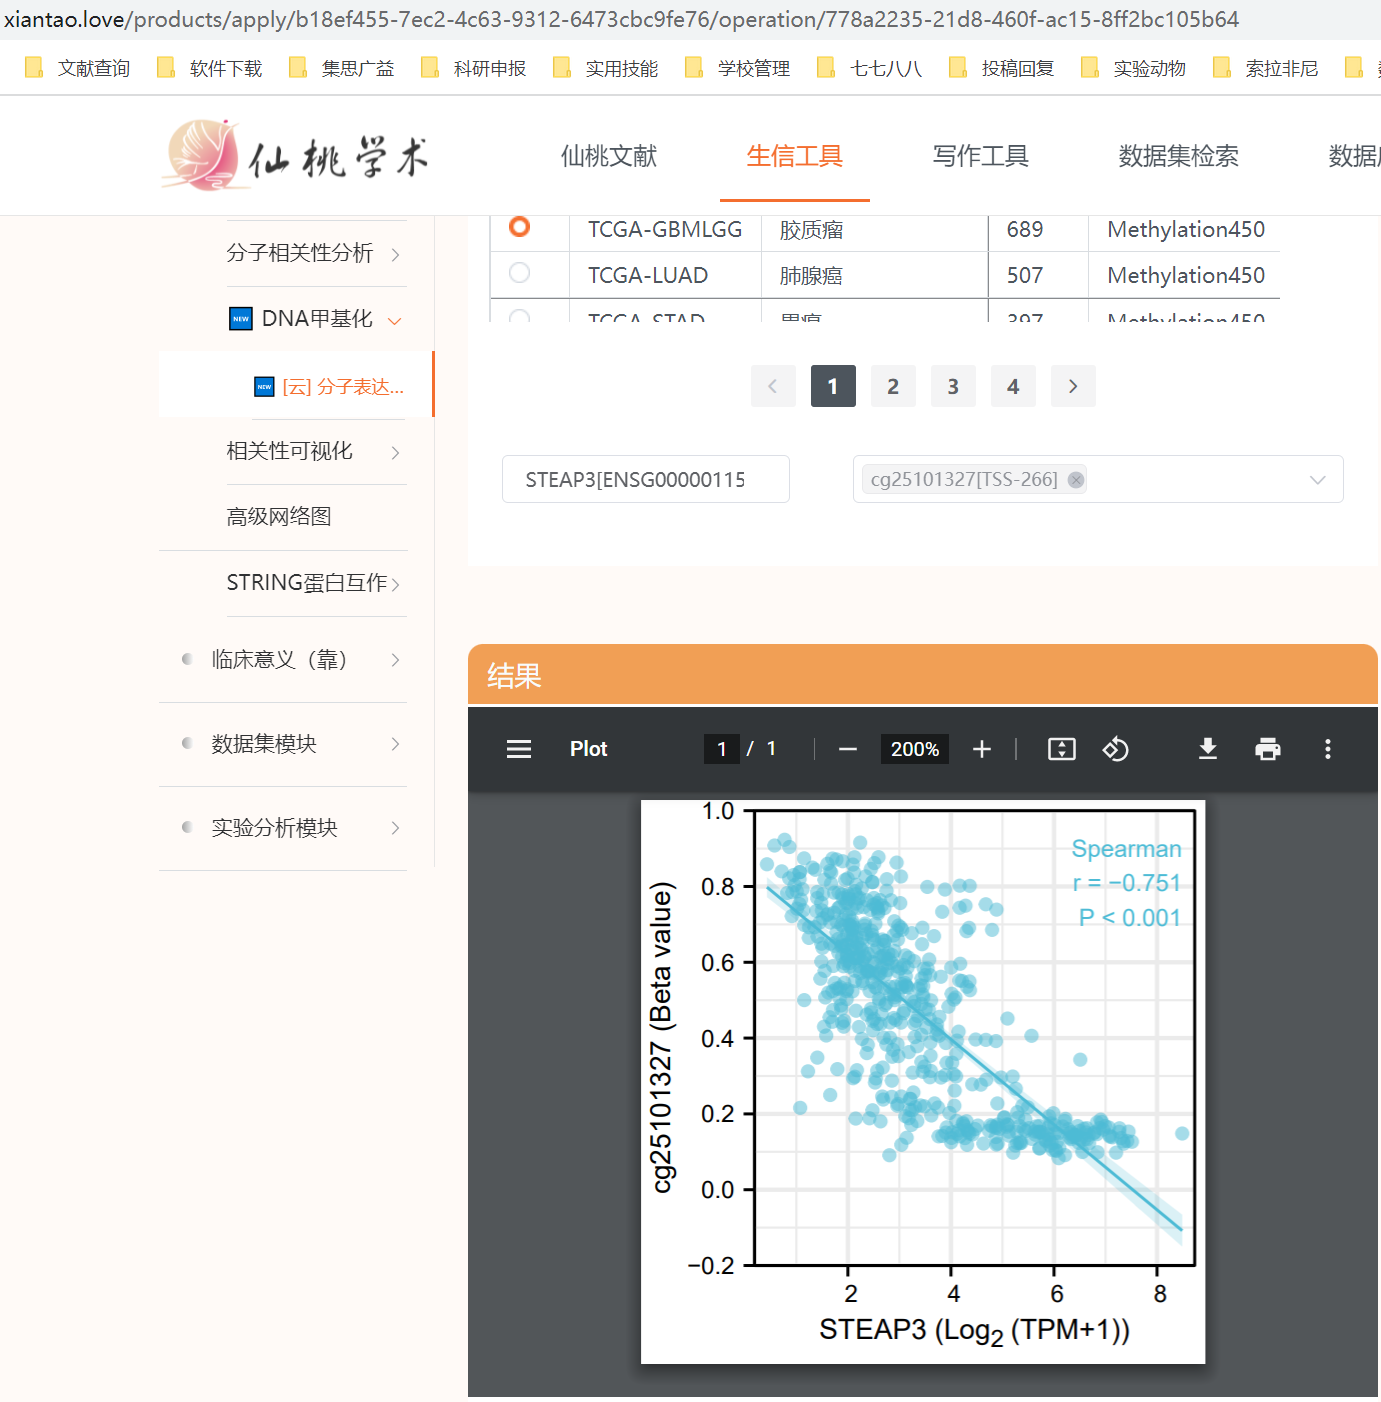

Supplement: raw_data_for_Figure_4.zip [file raw_data_for_Figure_4.zip]
