# Supplementary material for: High expression of six-transmembrane epithelial antigen of prostate 3 promotes the migration and invasion and predicts unfavorable prognosis in glioma
Source: PeerJ journal article supplement (doi:10.7717/peerj.15136), 2023-03-28

Figure 5A:

<http://biocc.hrbmu.edu.cn/CancerSEA/calForSingle?singleGene=STEAP3&submit=Search#datasetsDetail>

Figure 5B:


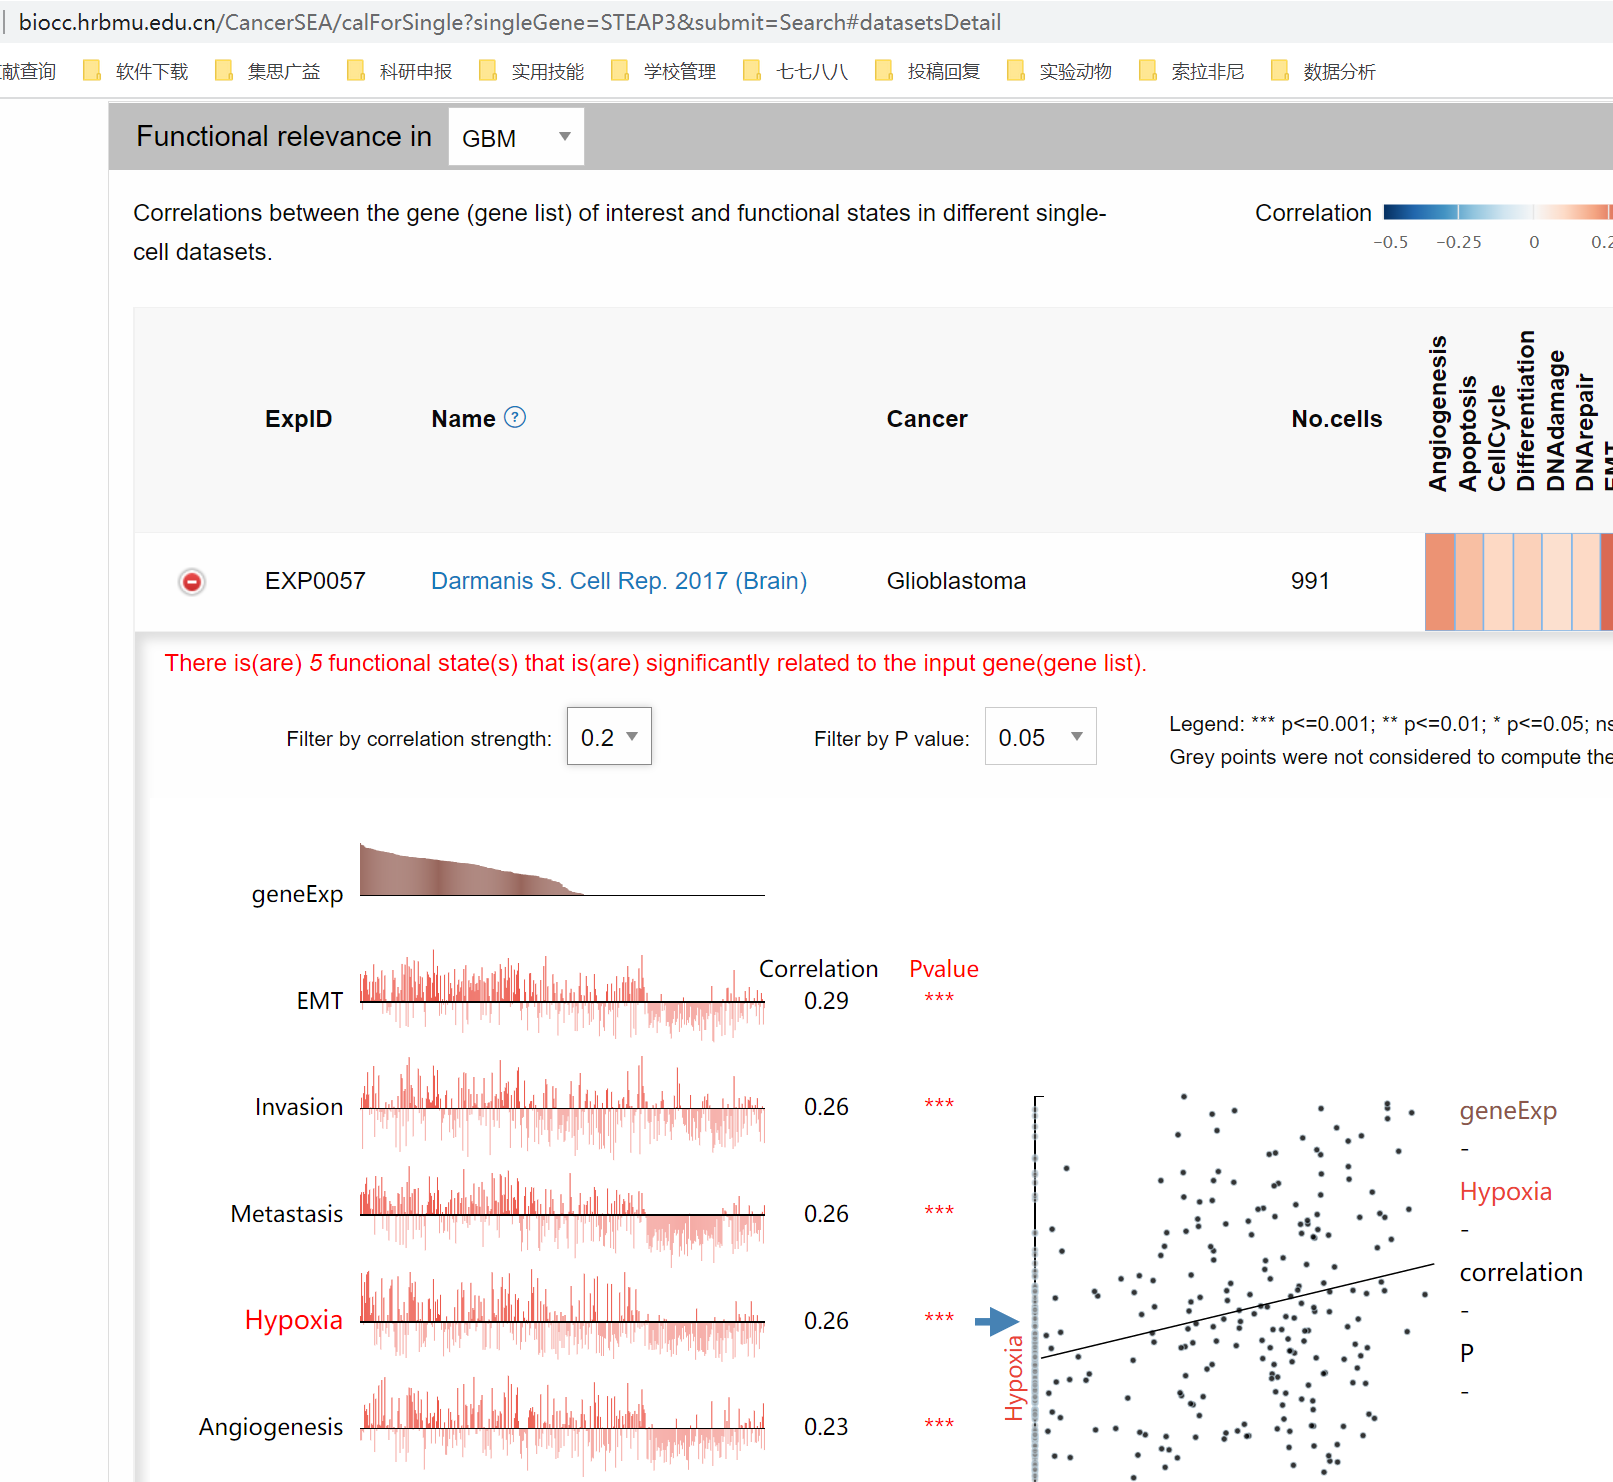

Supplement: raw_data_for_Figure_5.zip [file raw_data_for_Figure_5.zip]
