# Supplementary material for: High expression of six-transmembrane epithelial antigen of prostate 3 promotes the migration and invasion and predicts unfavorable prognosis in glioma
Source: PeerJ journal article supplement (doi:10.7717/peerj.15136), 2023-03-28

Figure 6A:

<http://linkedomics.org/lo_batchfile/lo_TCGAresult/lo_result_120374.png>


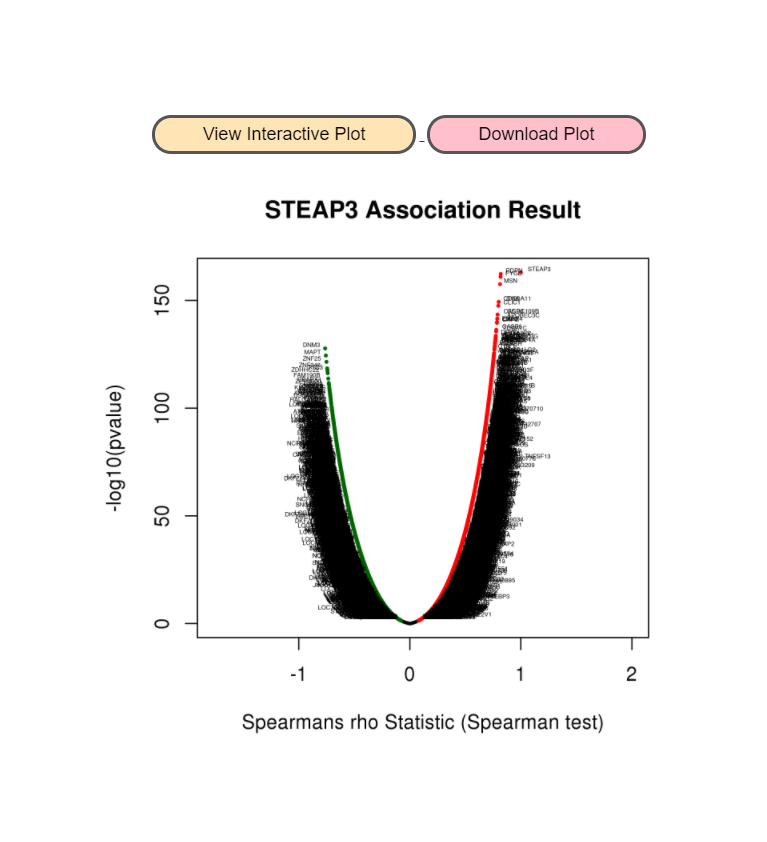


Figure 6B:

<http://linkedomics.org/lo_batchfile/lo_TCGAresult/lo_result_120374_pos_heatplot.png>


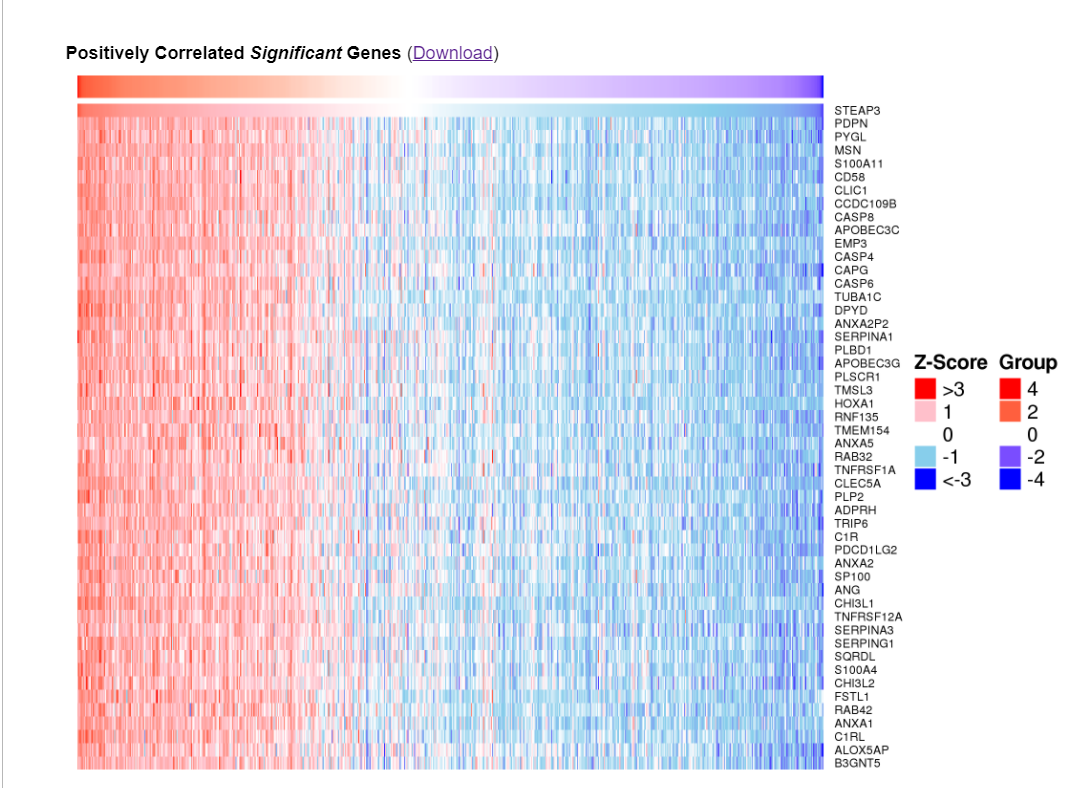


Figure 6C:

<http://linkedomics.org/lo_batchfile/lo_TCGAresult/lo_result_120374_neg_heatplot.png>


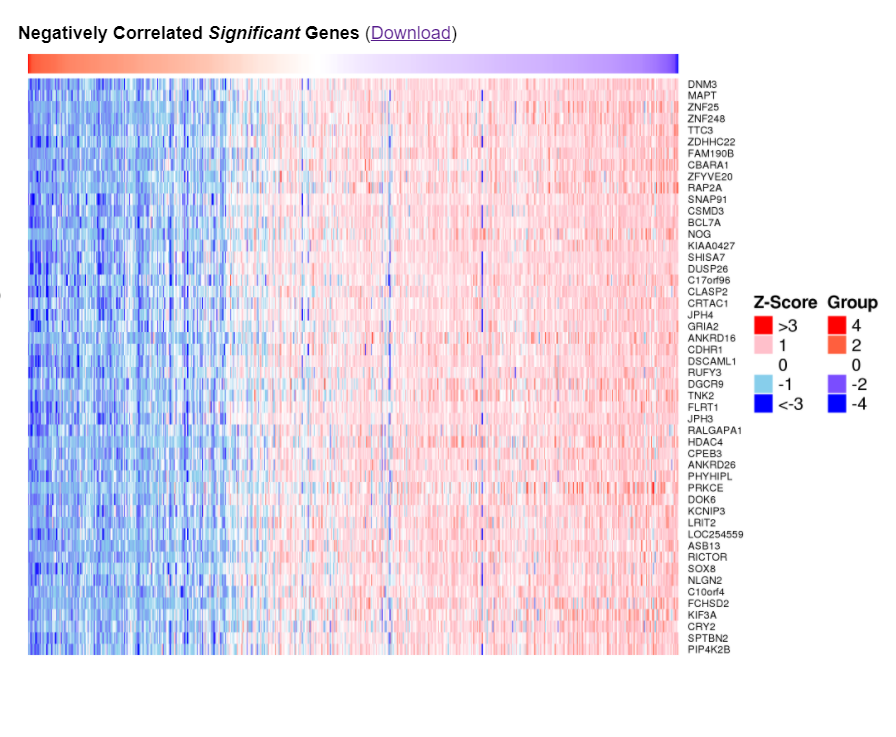


Figure 6D:


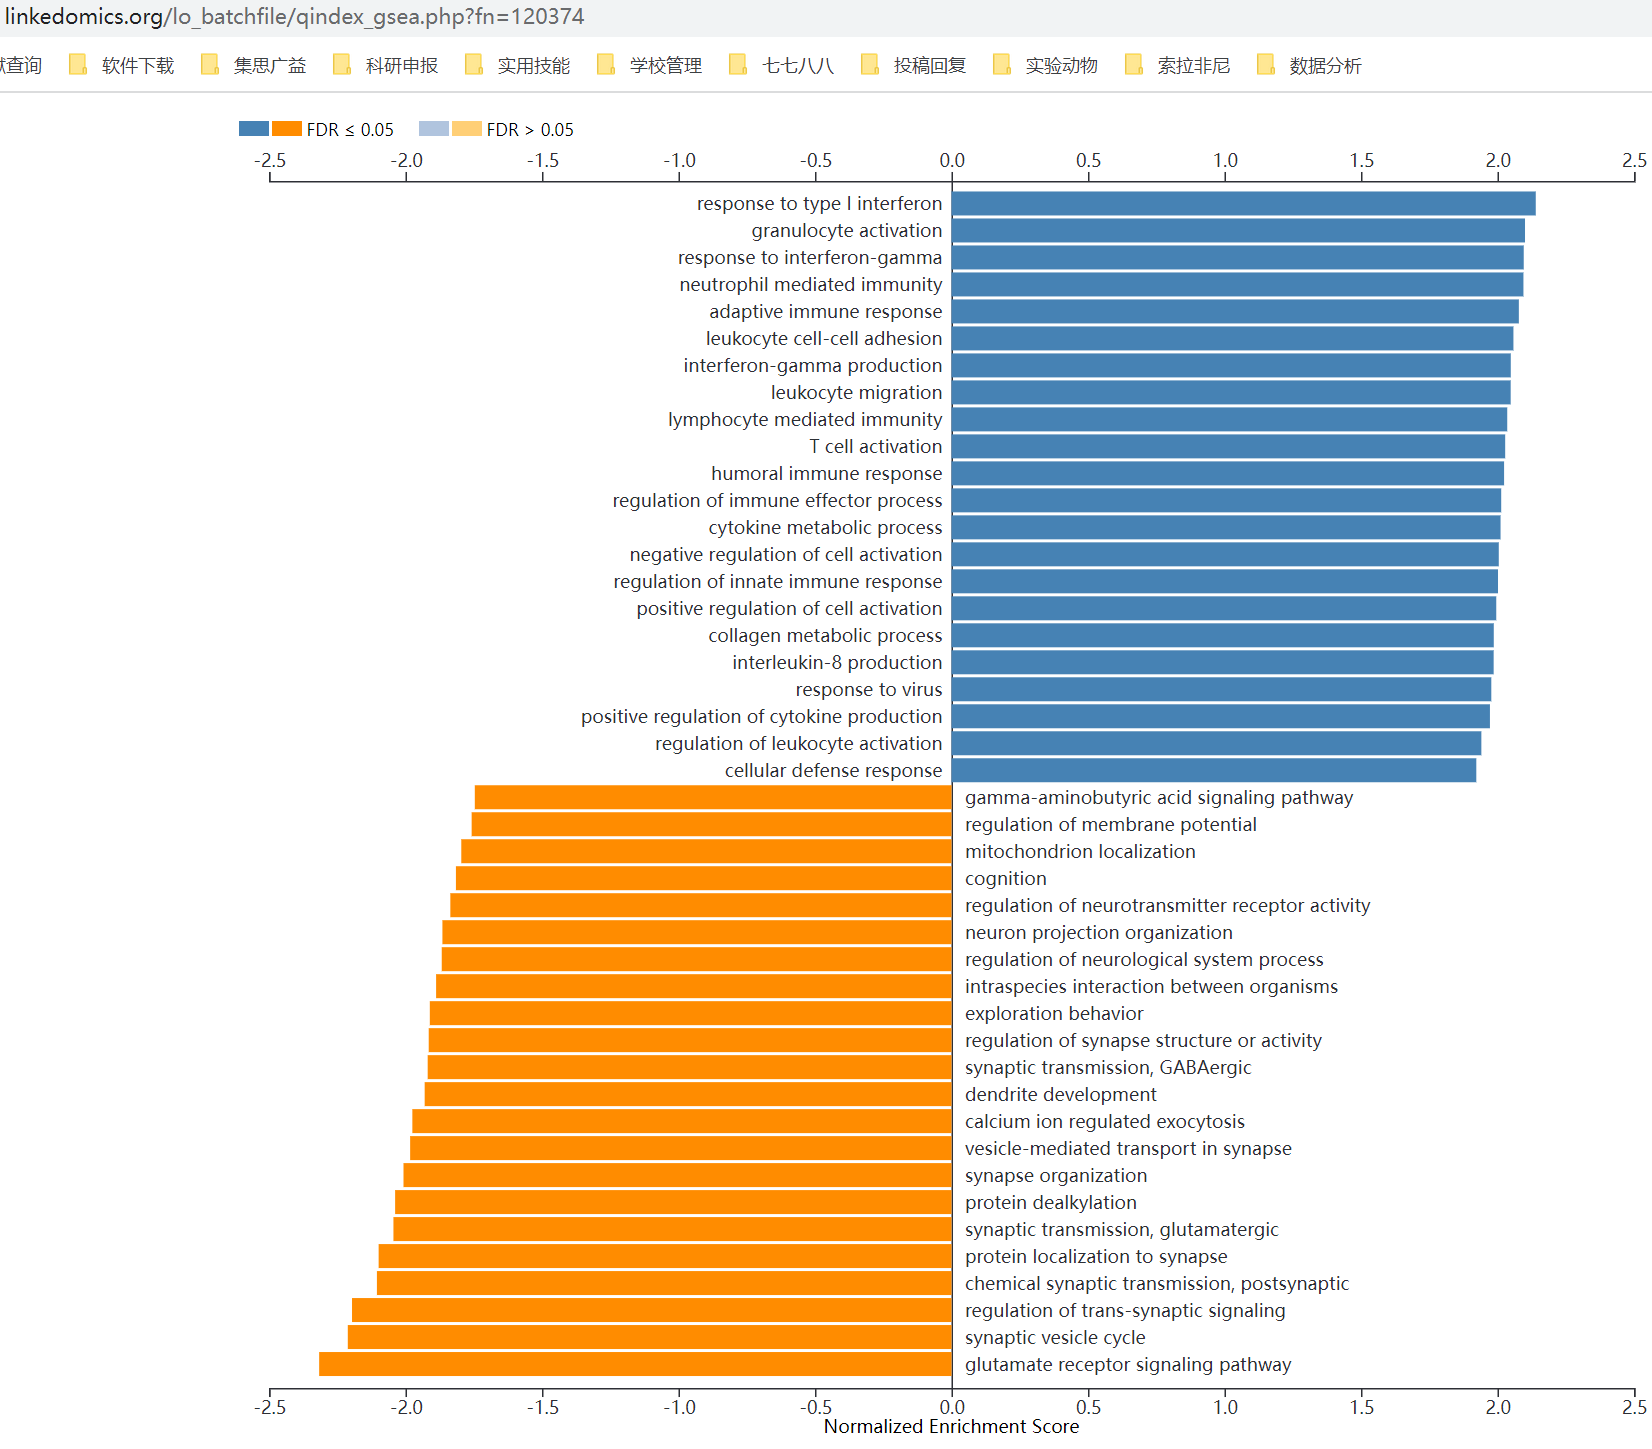


Figure 6E:


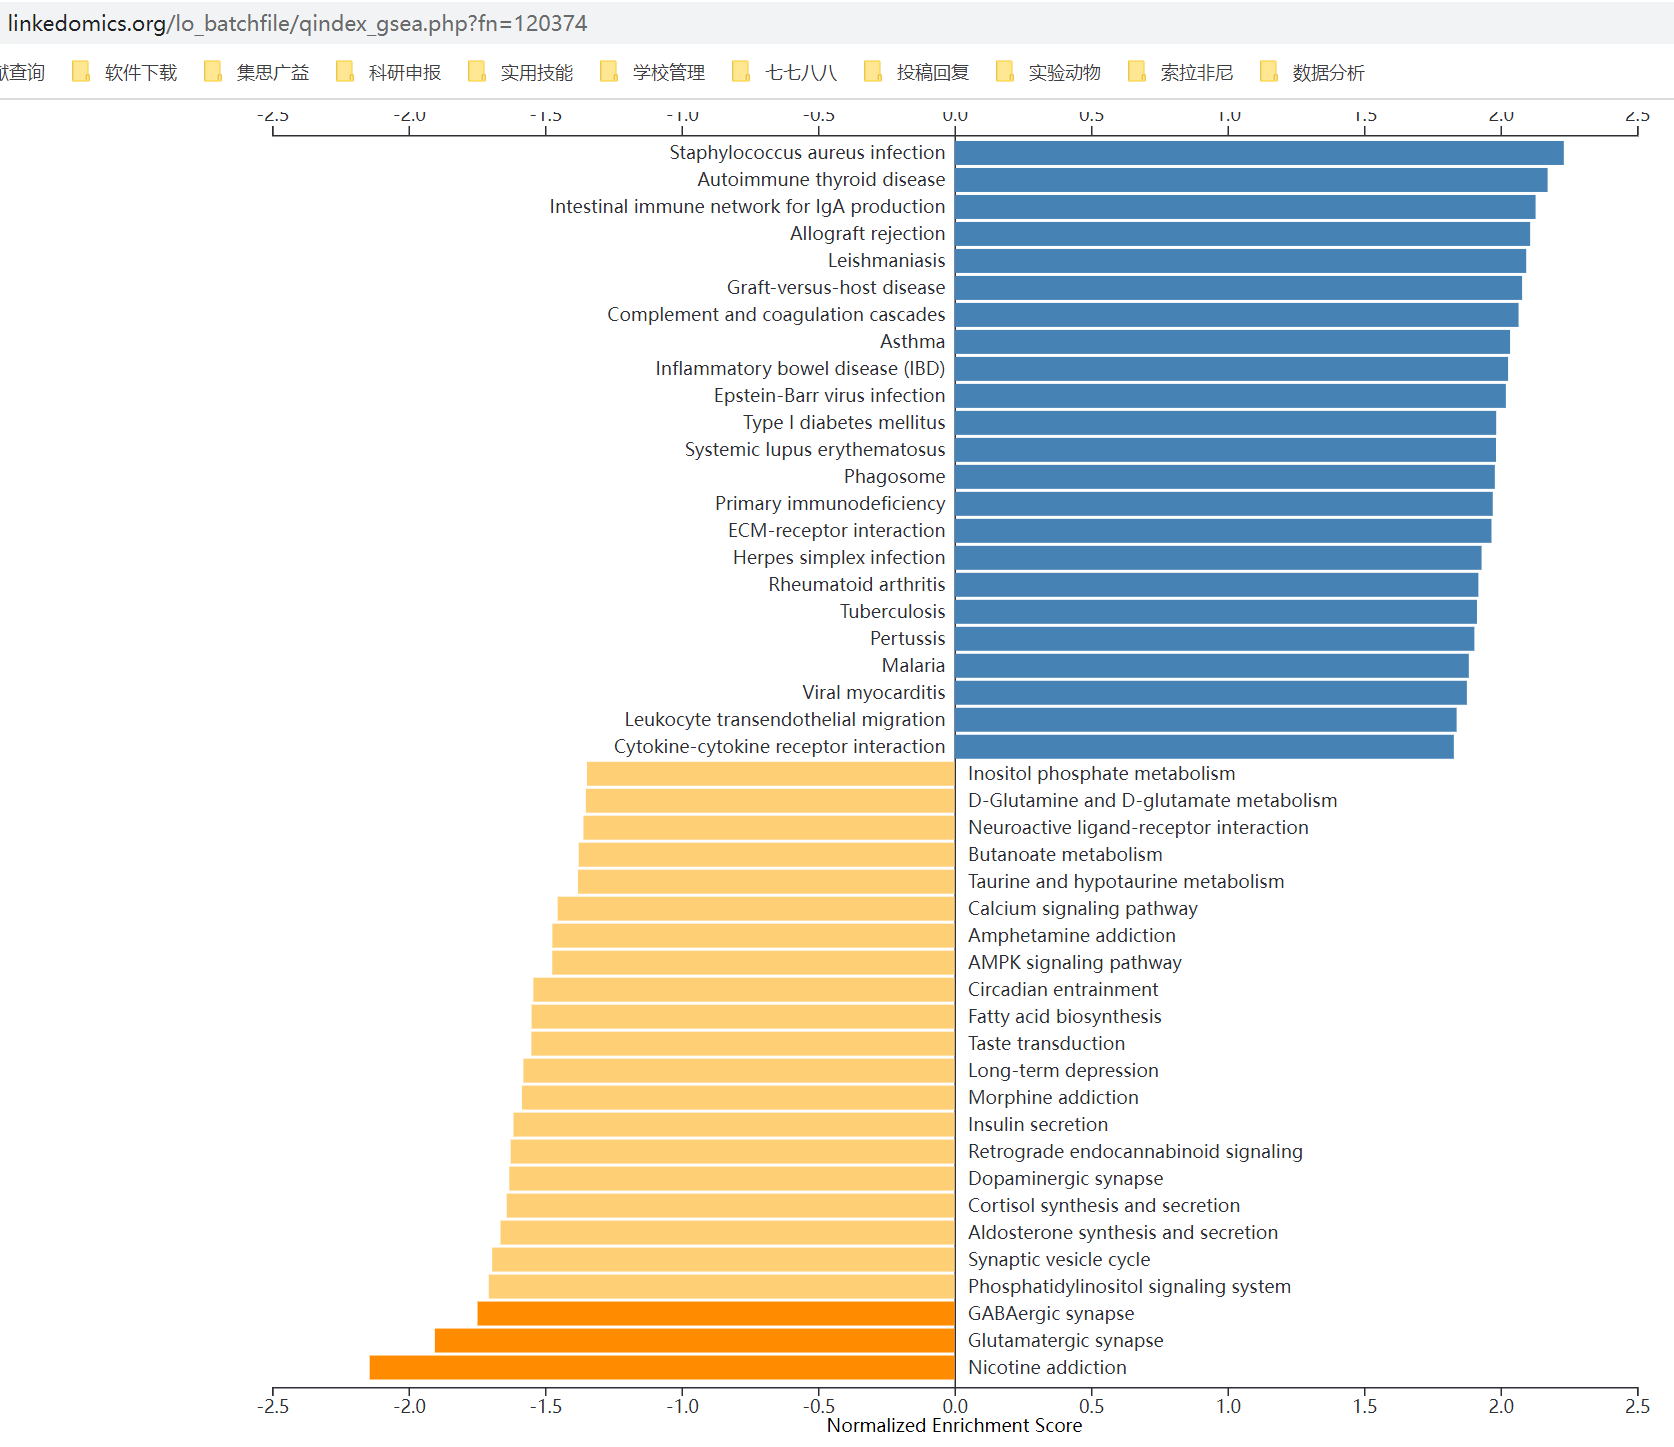


Figure 6F:


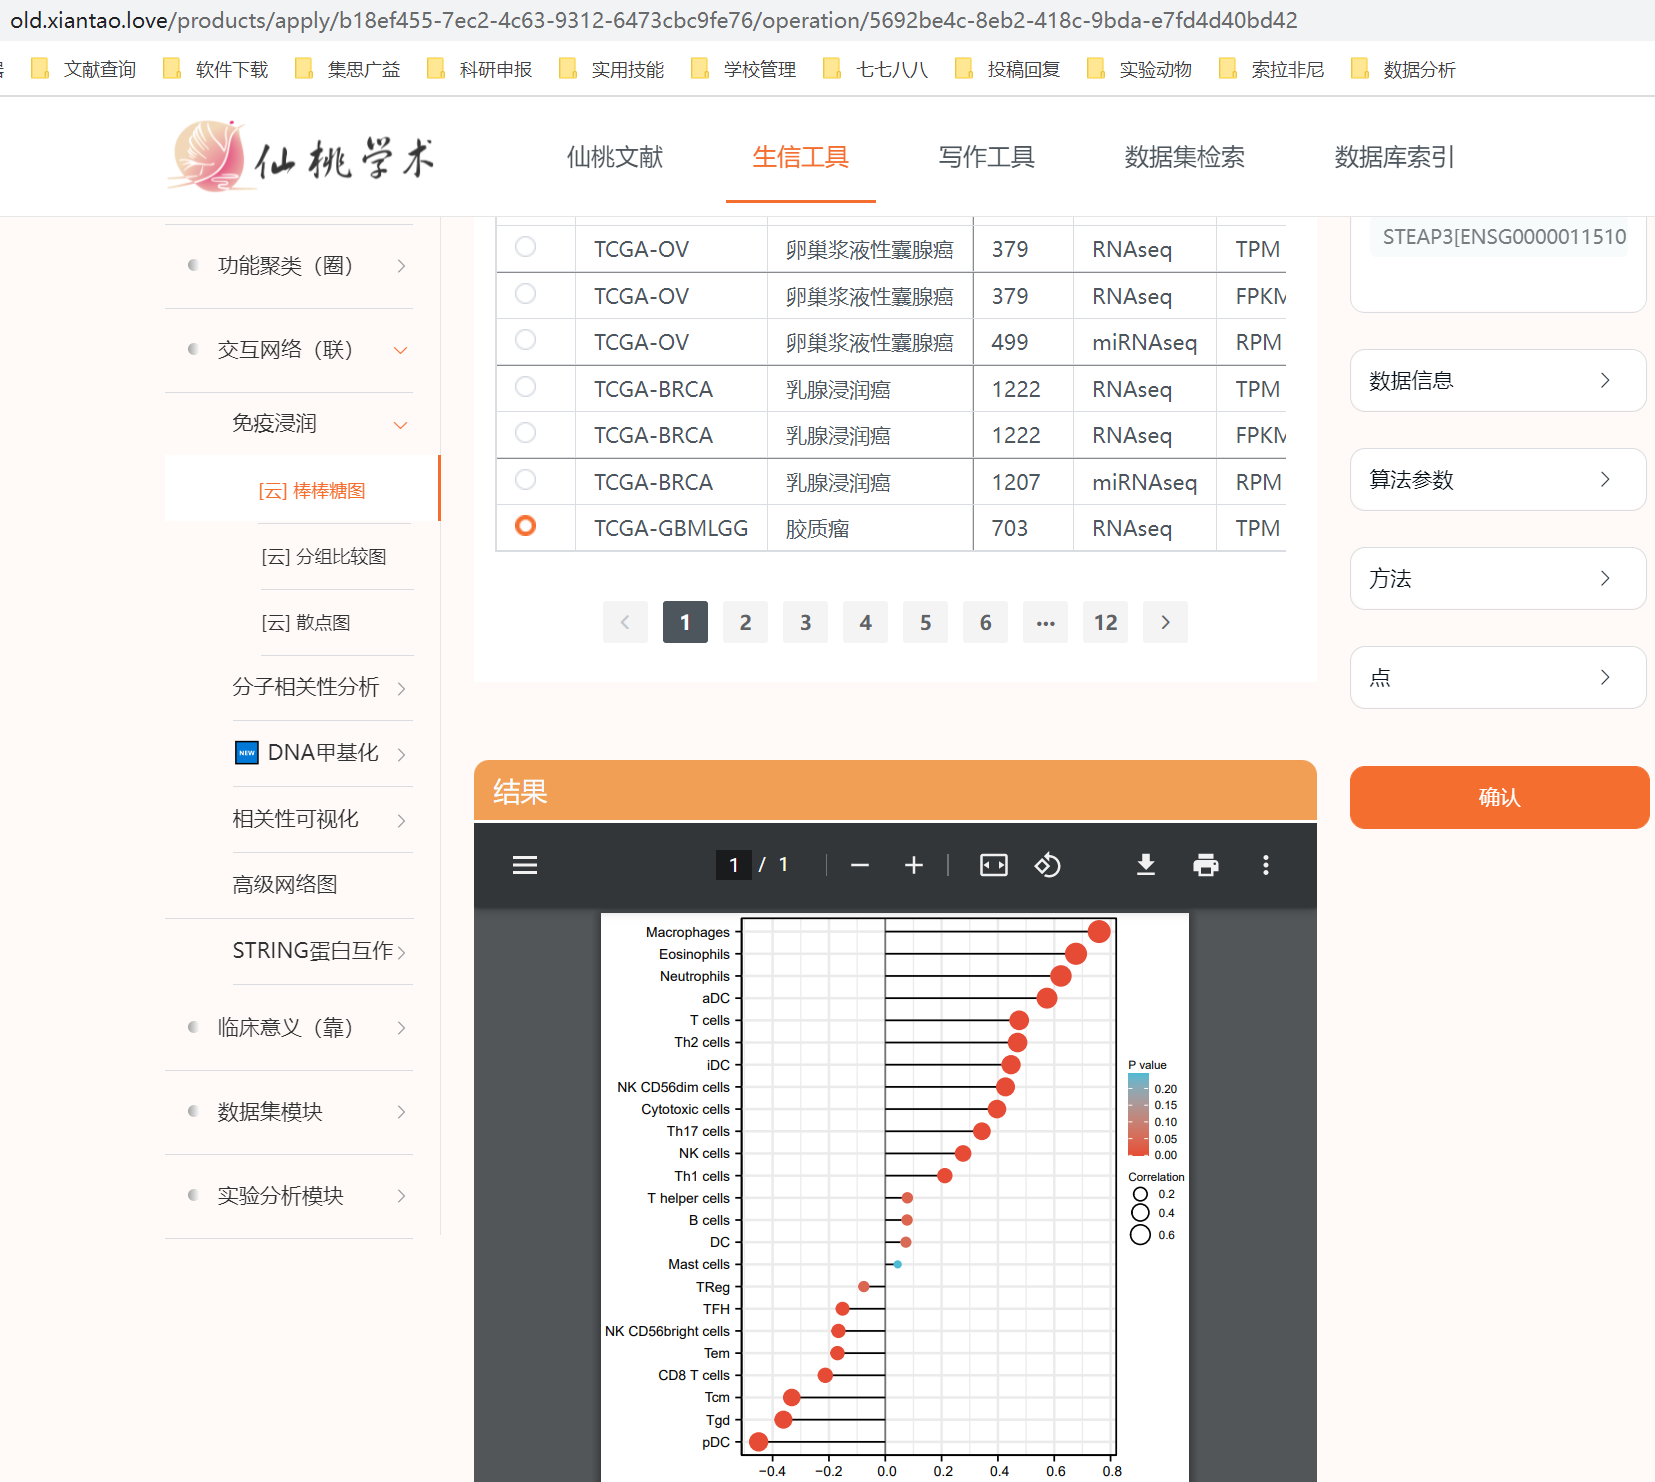


Figure 6G:


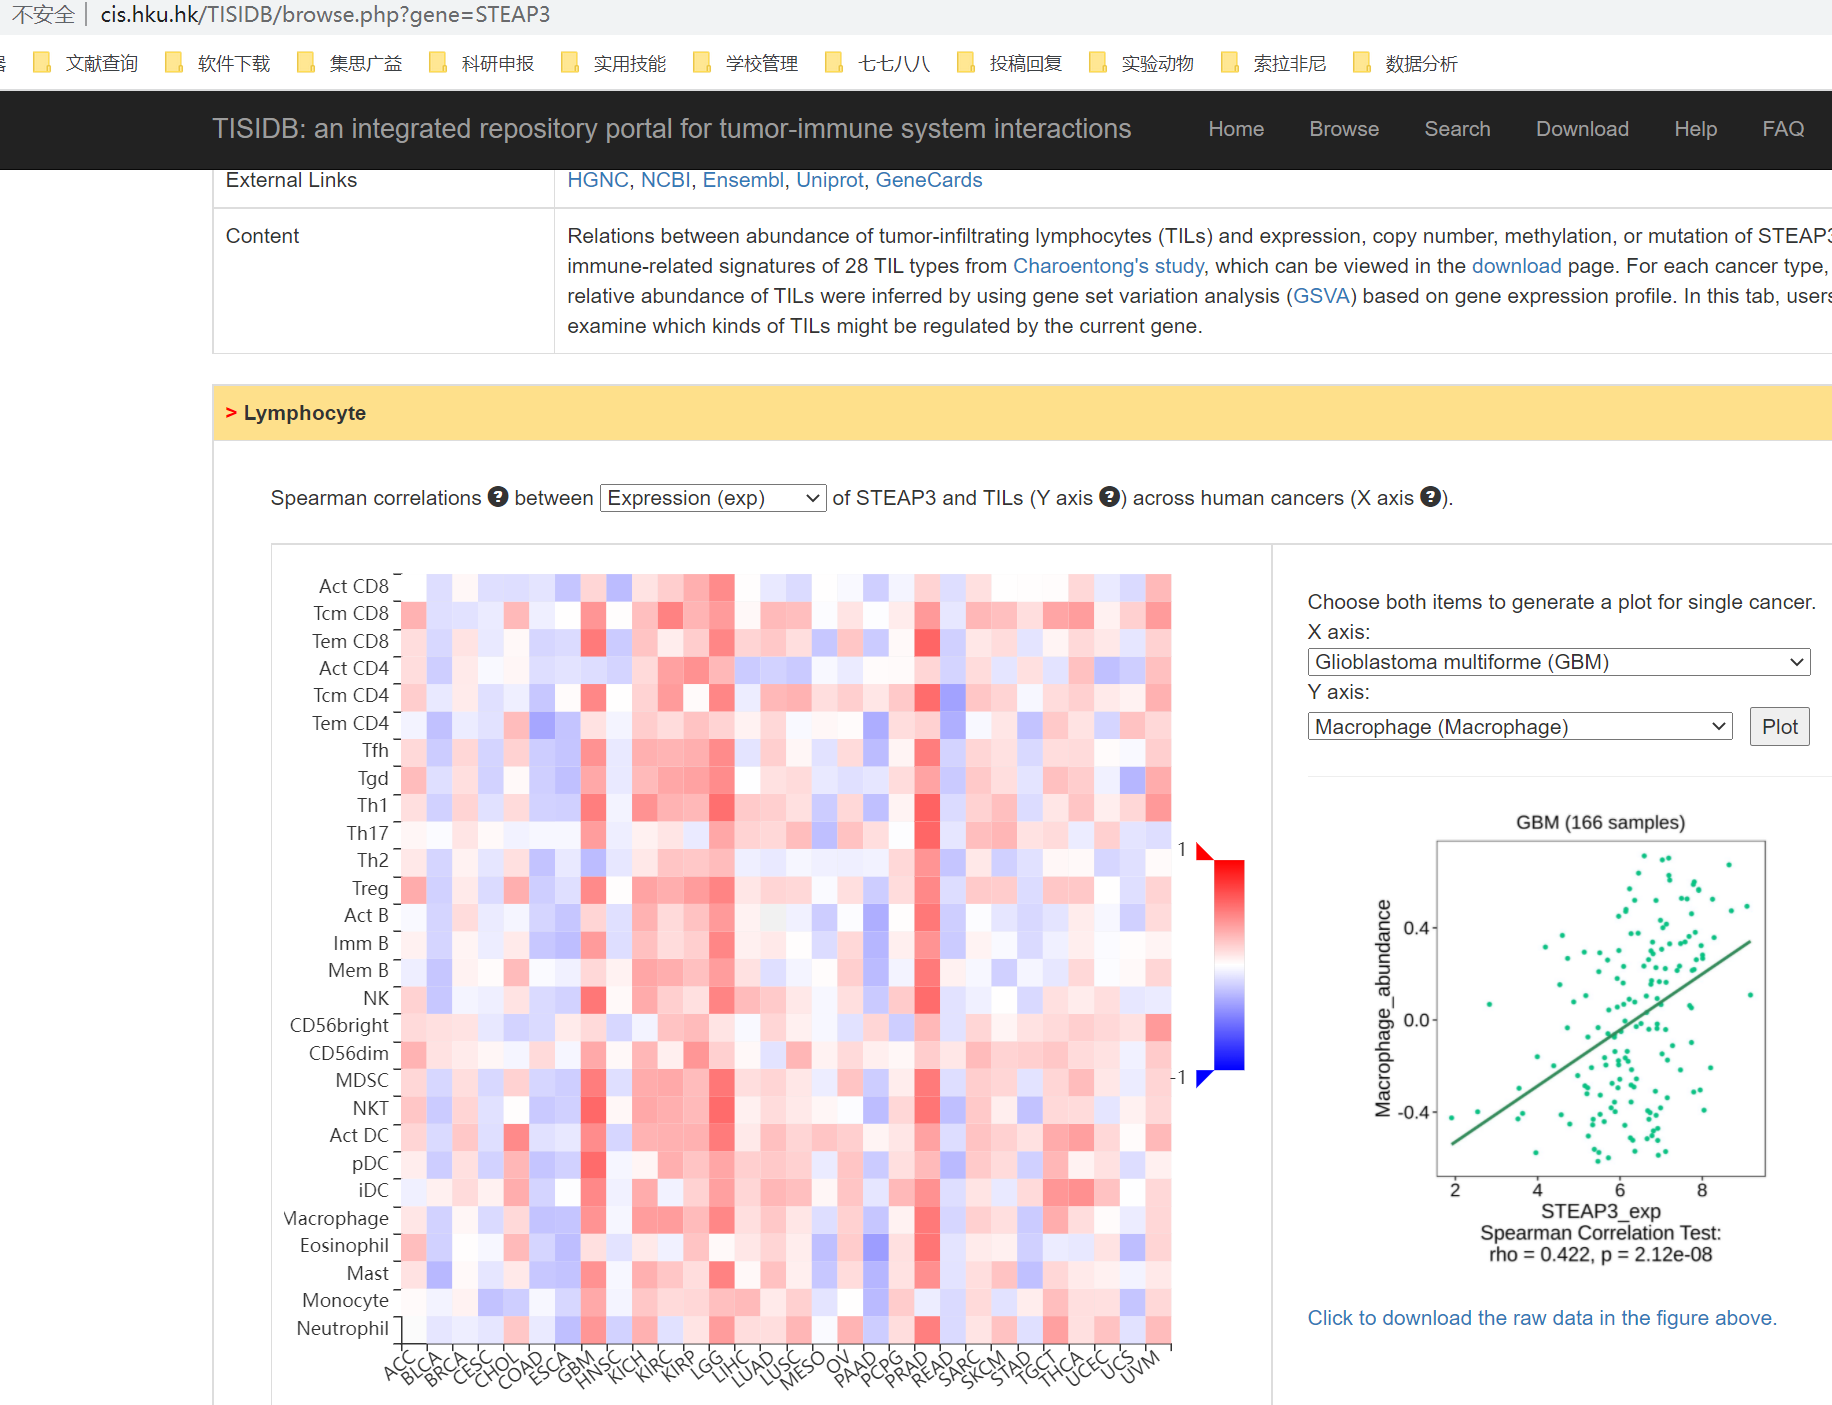


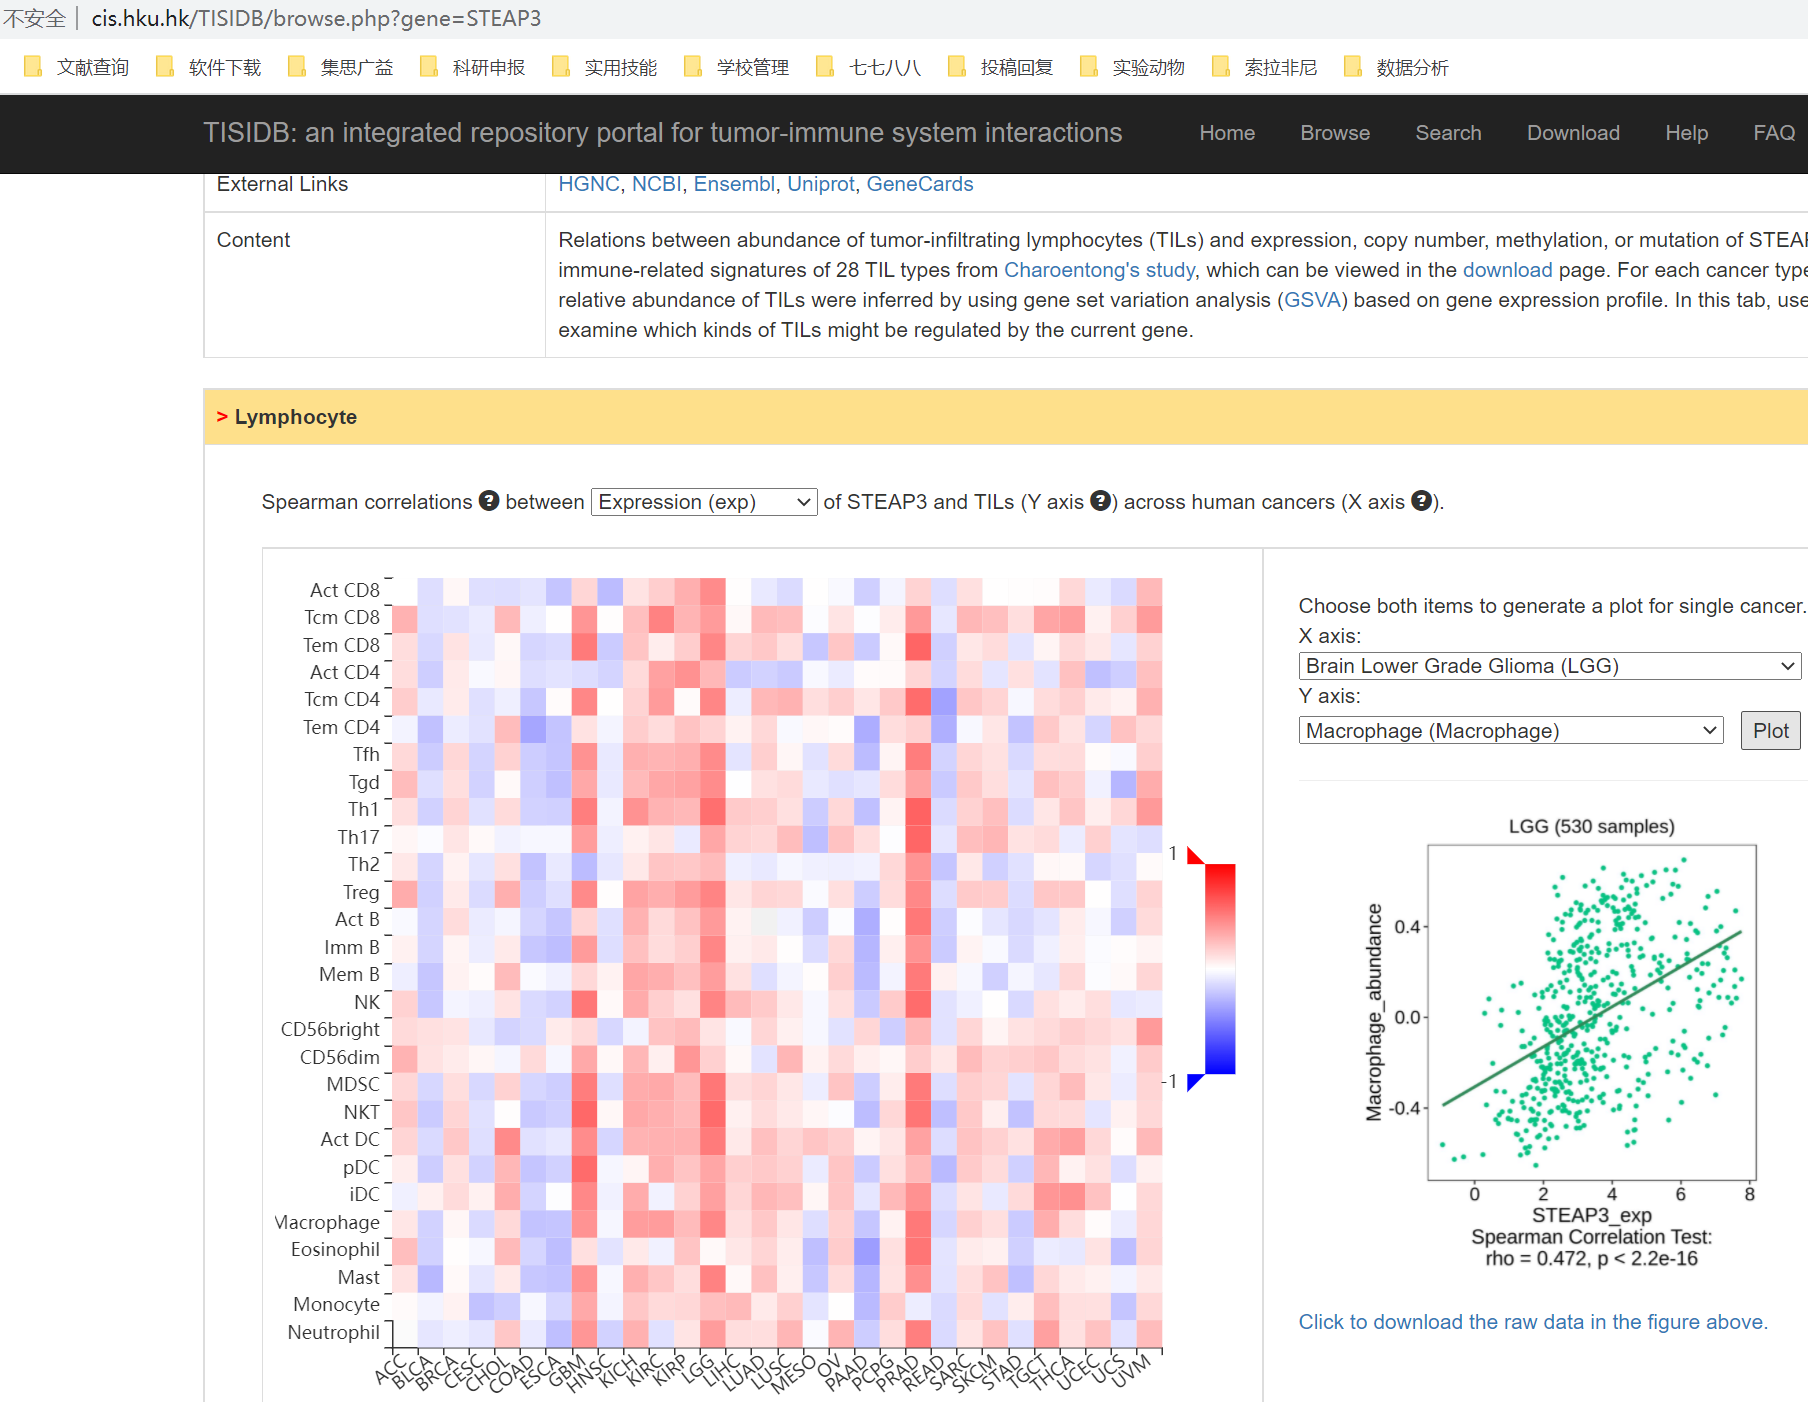


Figure 6H:


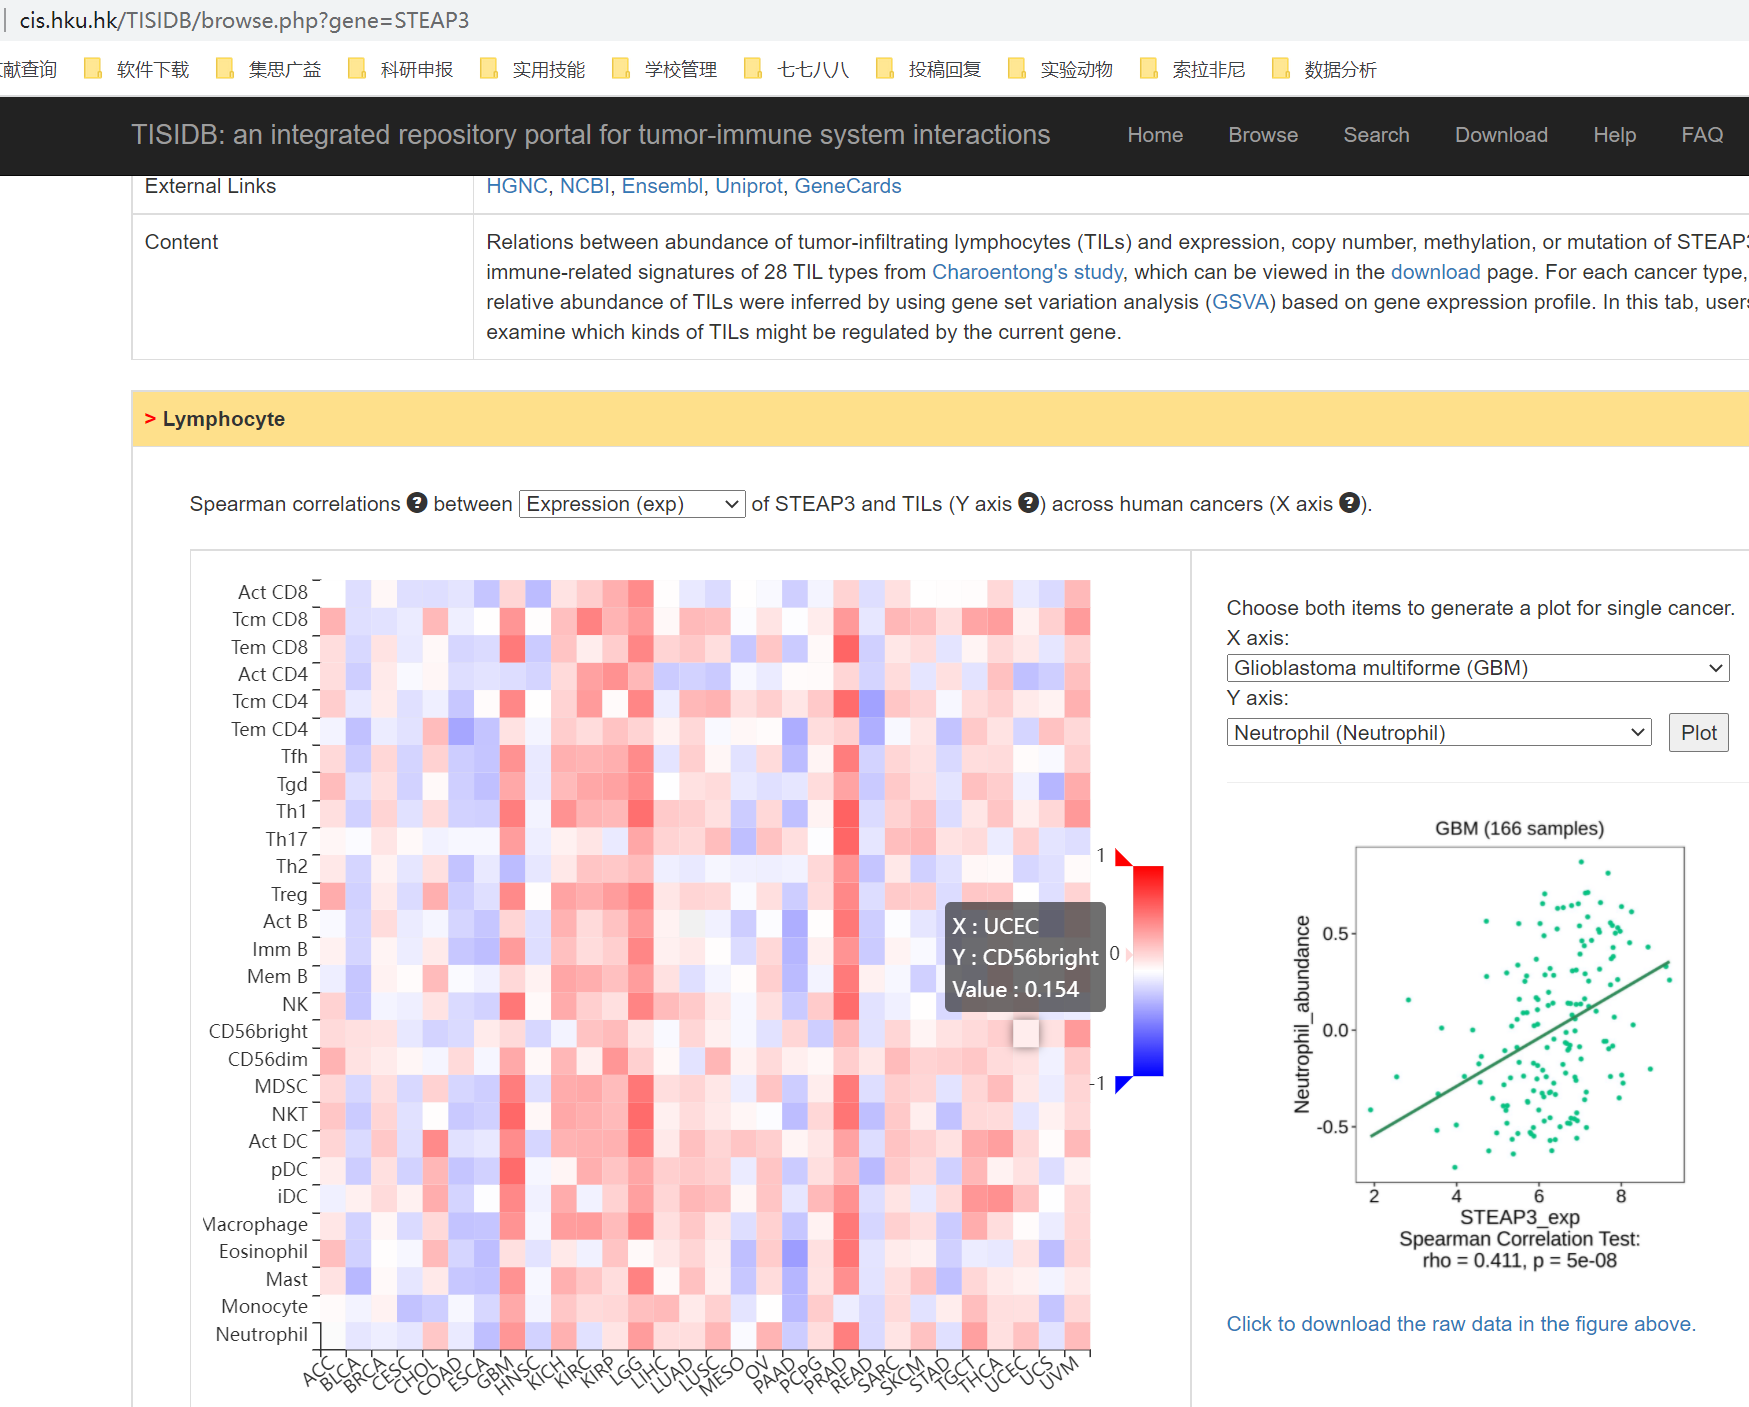


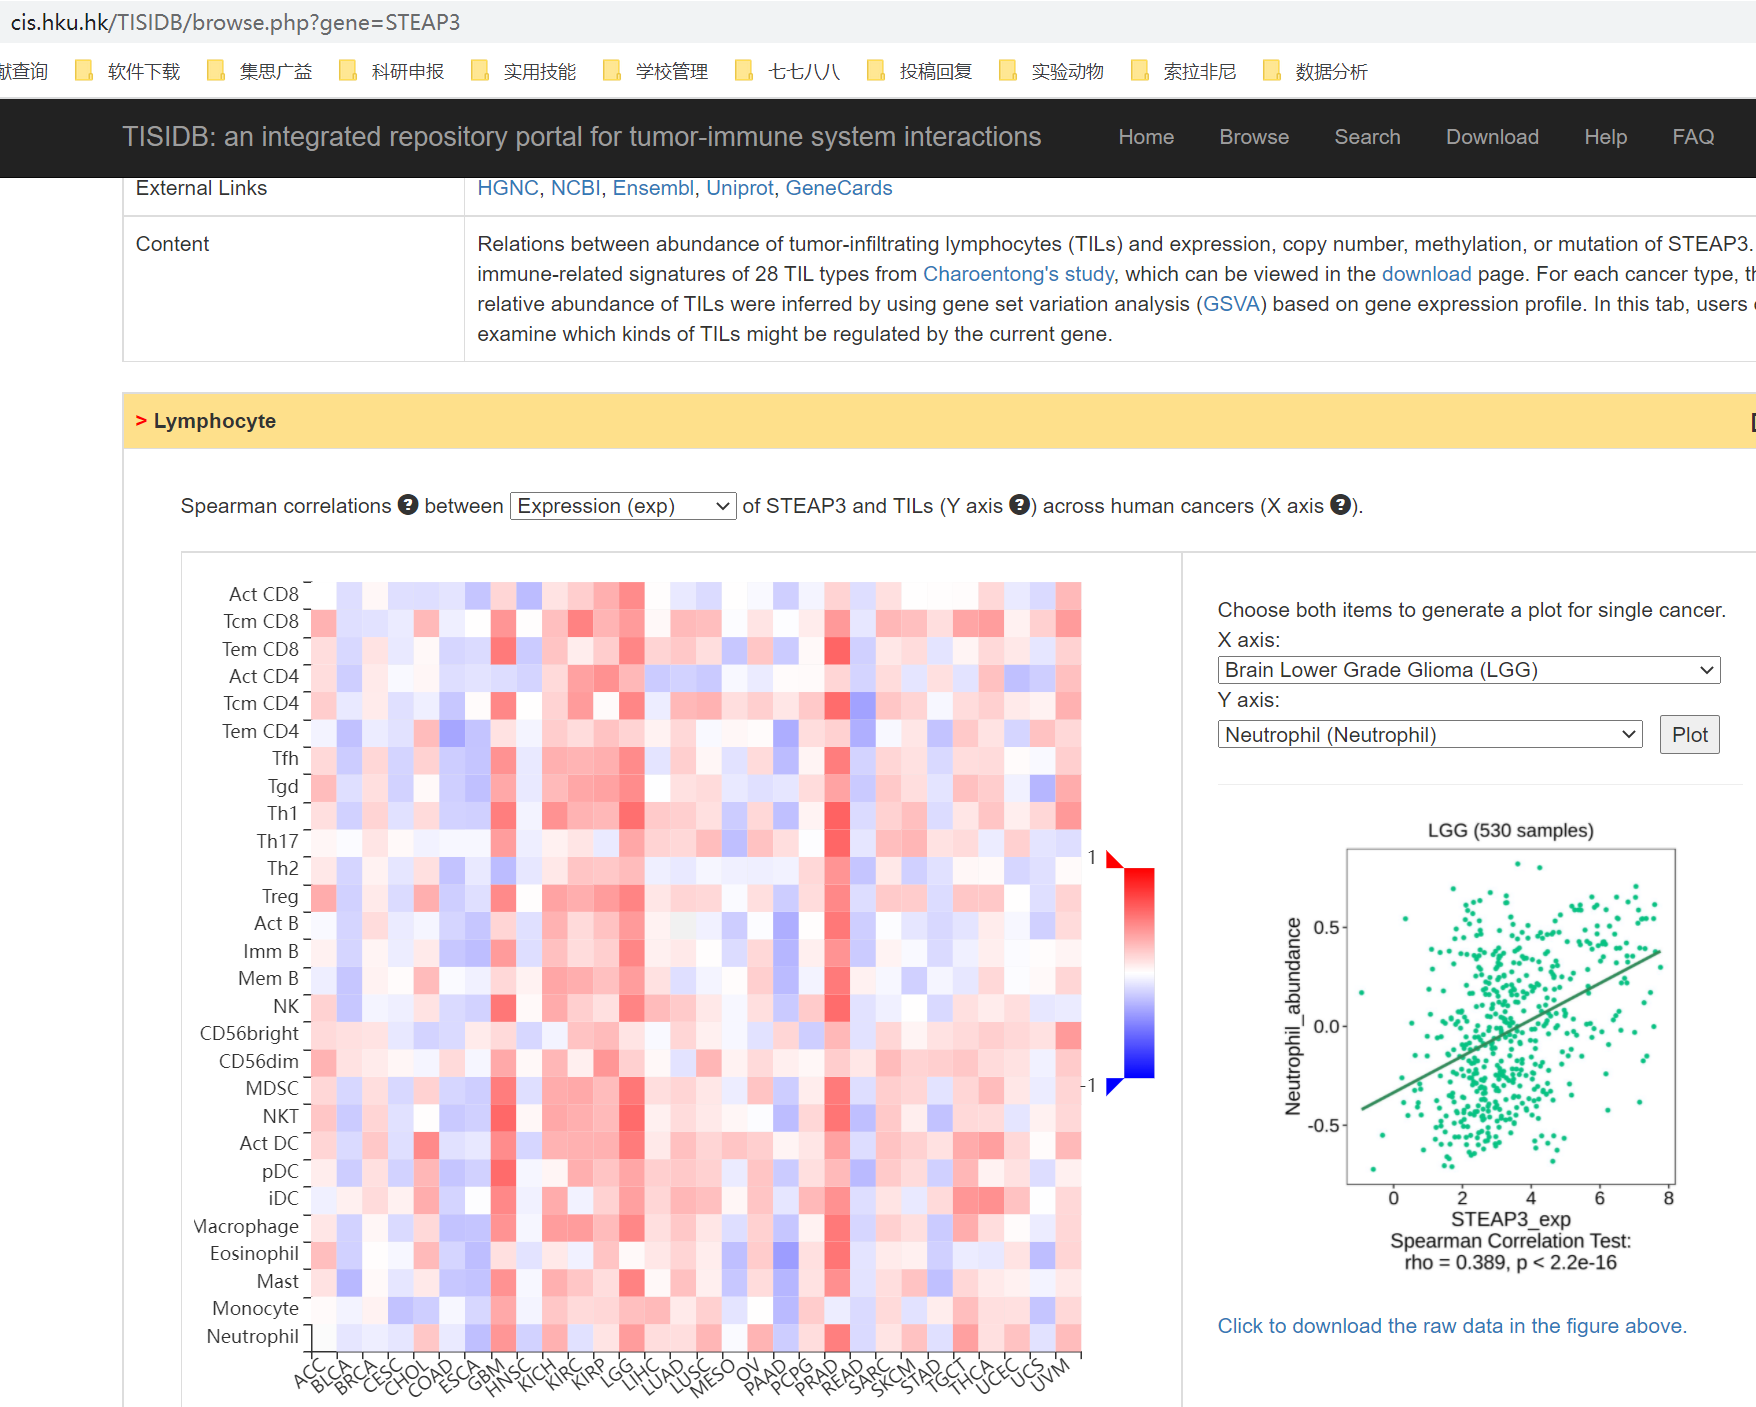

Supplement: raw_data_for_Figure_6.zip [file raw_data_for_Figure_6.zip]
