# Supplementary material for: High expression of six-transmembrane epithelial antigen of prostate 3 promotes the migration and invasion and predicts unfavorable prognosis in glioma
Source: PeerJ. 2023 Mar 28;11:e15136. doi: 10.7717/peerj.15136 (PMC10065001; doi:10.7717/peerj.15136)
Supplement: Supplemental Information 5 [file peerj-11-15136-s005.xlsx]

## Sheet: positive correlation
STEAP3
PDPN
PYGL
MSN
S100A11
CD58
CLIC1
CCDC109B
CASP8
APOBEC3C
EMP3
CASP4
CAPG
CASP6
TUBA1C
DPYD
ANXA2P2
SERPINA1
PLBD1
APOBEC3G
PLSCR1
TMSL3
HOXA1
RNF135
TMEM154
ANXA5
RAB32
TNFRSF1A
CLEC5A
PLP2
ADPRH
TRIP6
C1R
PDCD1LG2
ANXA2
SP100
ANG
CHI3L1
TNFRSF12A
SERPINA3
SERPING1
SQRDL
S100A4
CHI3L2
FSTL1
RAB42
ANXA1
C1RL
ALOX5AP
B3GNT5

## Sheet: negative correlation
DNM3
MAPT
ZNF25
ZNF248
TTC3
ZDHHC22
FAM190B
CBARA1
ZFYVE20
RAP2A
SNAP91
CSMD3
BCL7A
NOG
KIAA0427
SHISA7
DUSP26
C17orf96
CLASP2
CRTAC1
JPH4
GRIA2
ANKRD16
CDHR1
DSCAML1
RUFY3
DGCR9
TNK2
FLRT1
JPH3
RALGAPA1
HDAC4
CPEB3
ANKRD26
PHYHIPL
PRKCE
DOK6
KCNIP3
LRIT2
LOC254559
ASB13
RICTOR
SOX8
NLGN2
C10orf4
FCHSD2
KIF3A
CRY2
SPTBN2
PIP4K2B
