# Supplementary figures and images for: High expression of six-transmembrane epithelial antigen of prostate 3 promotes the migration and invasion and predicts unfavorable prognosis in glioma
Source: PeerJ journal article supplement (doi:10.7717/peerj.15136), 2023-03-28

Figure 7A:


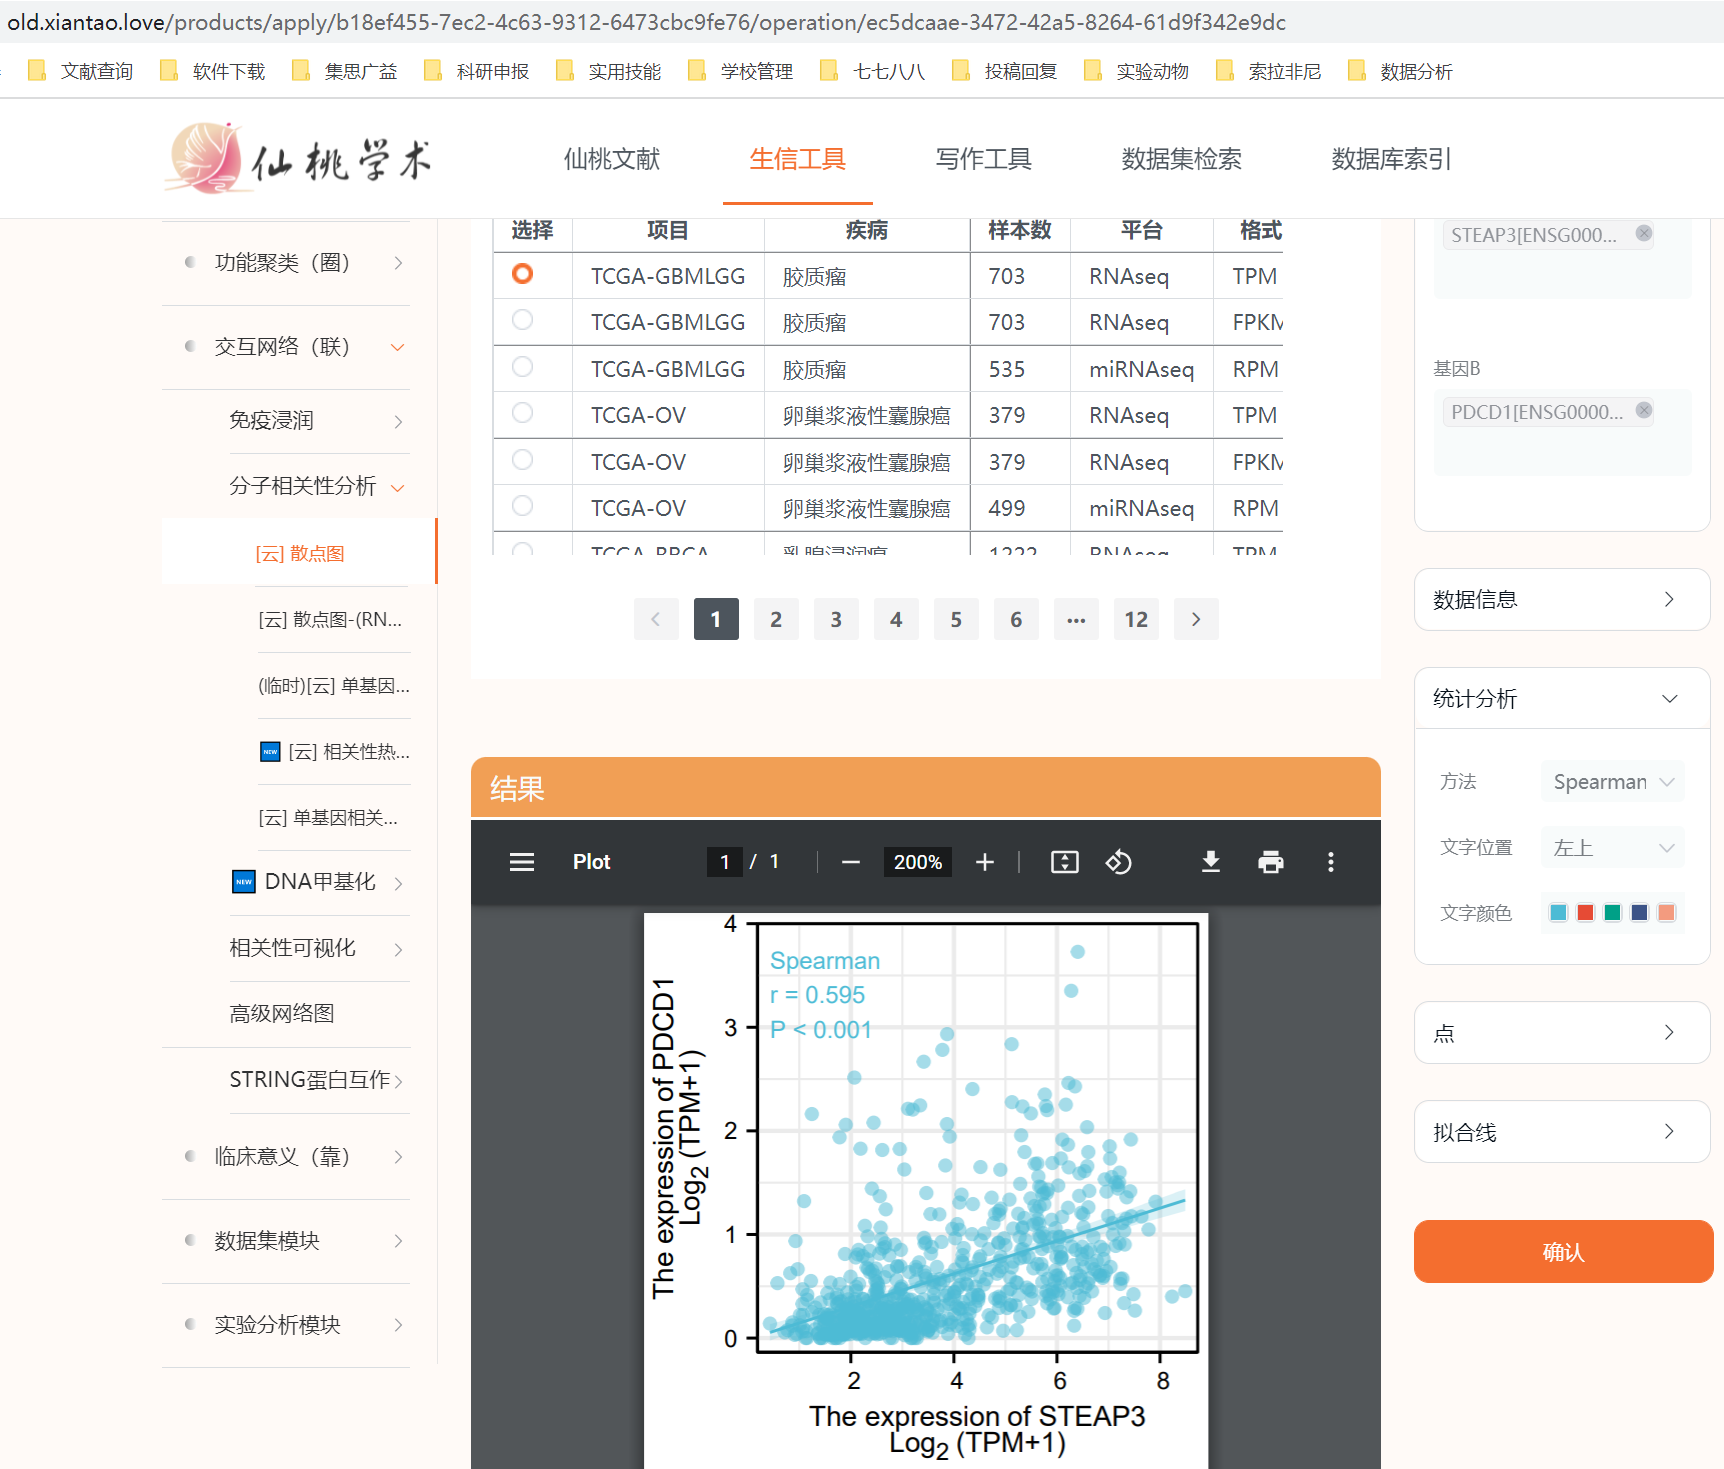


Figure 7B:


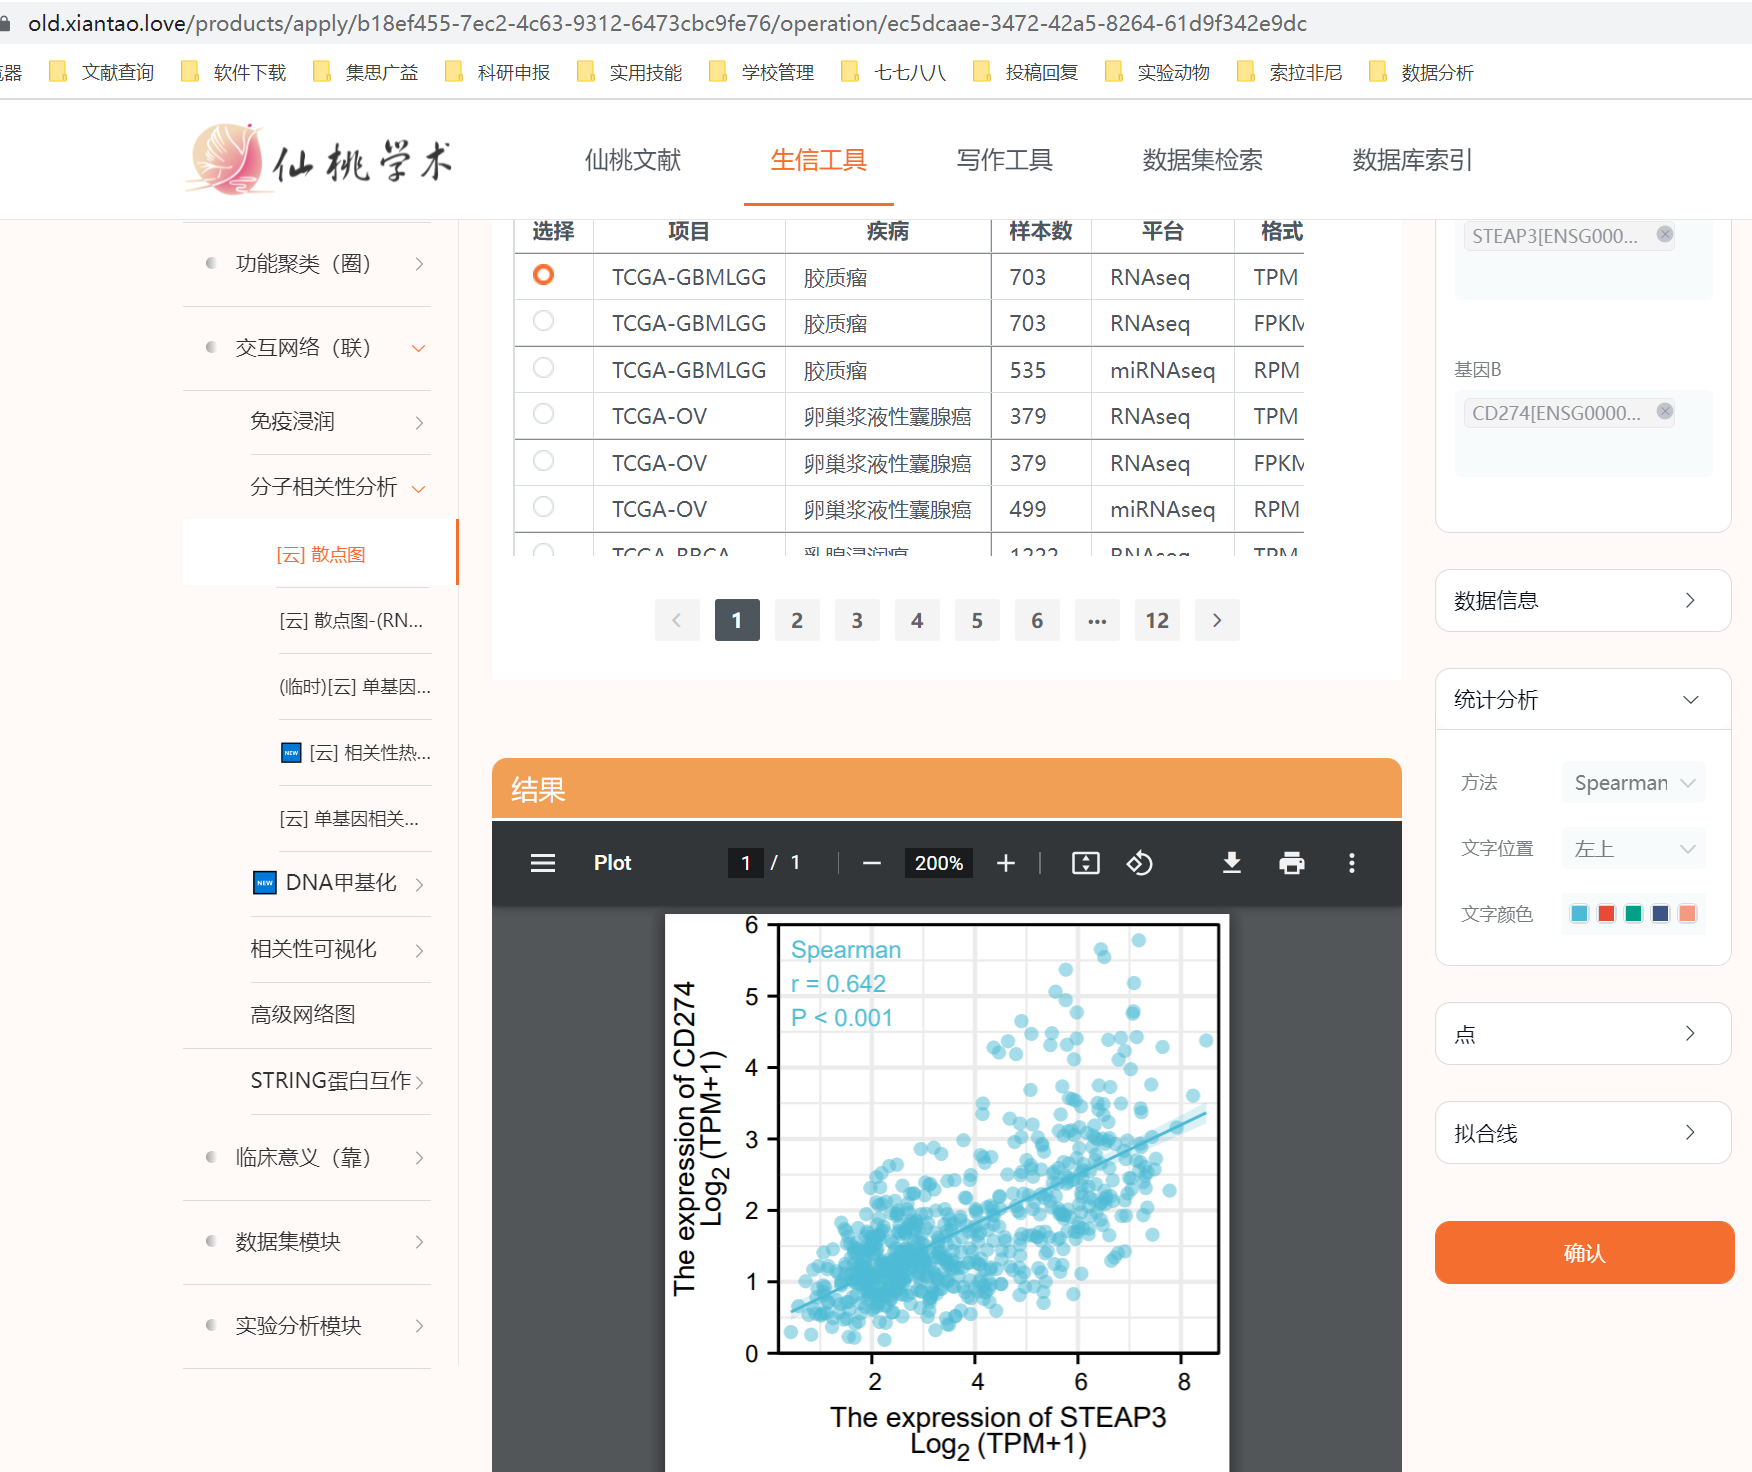


Figure 7C:


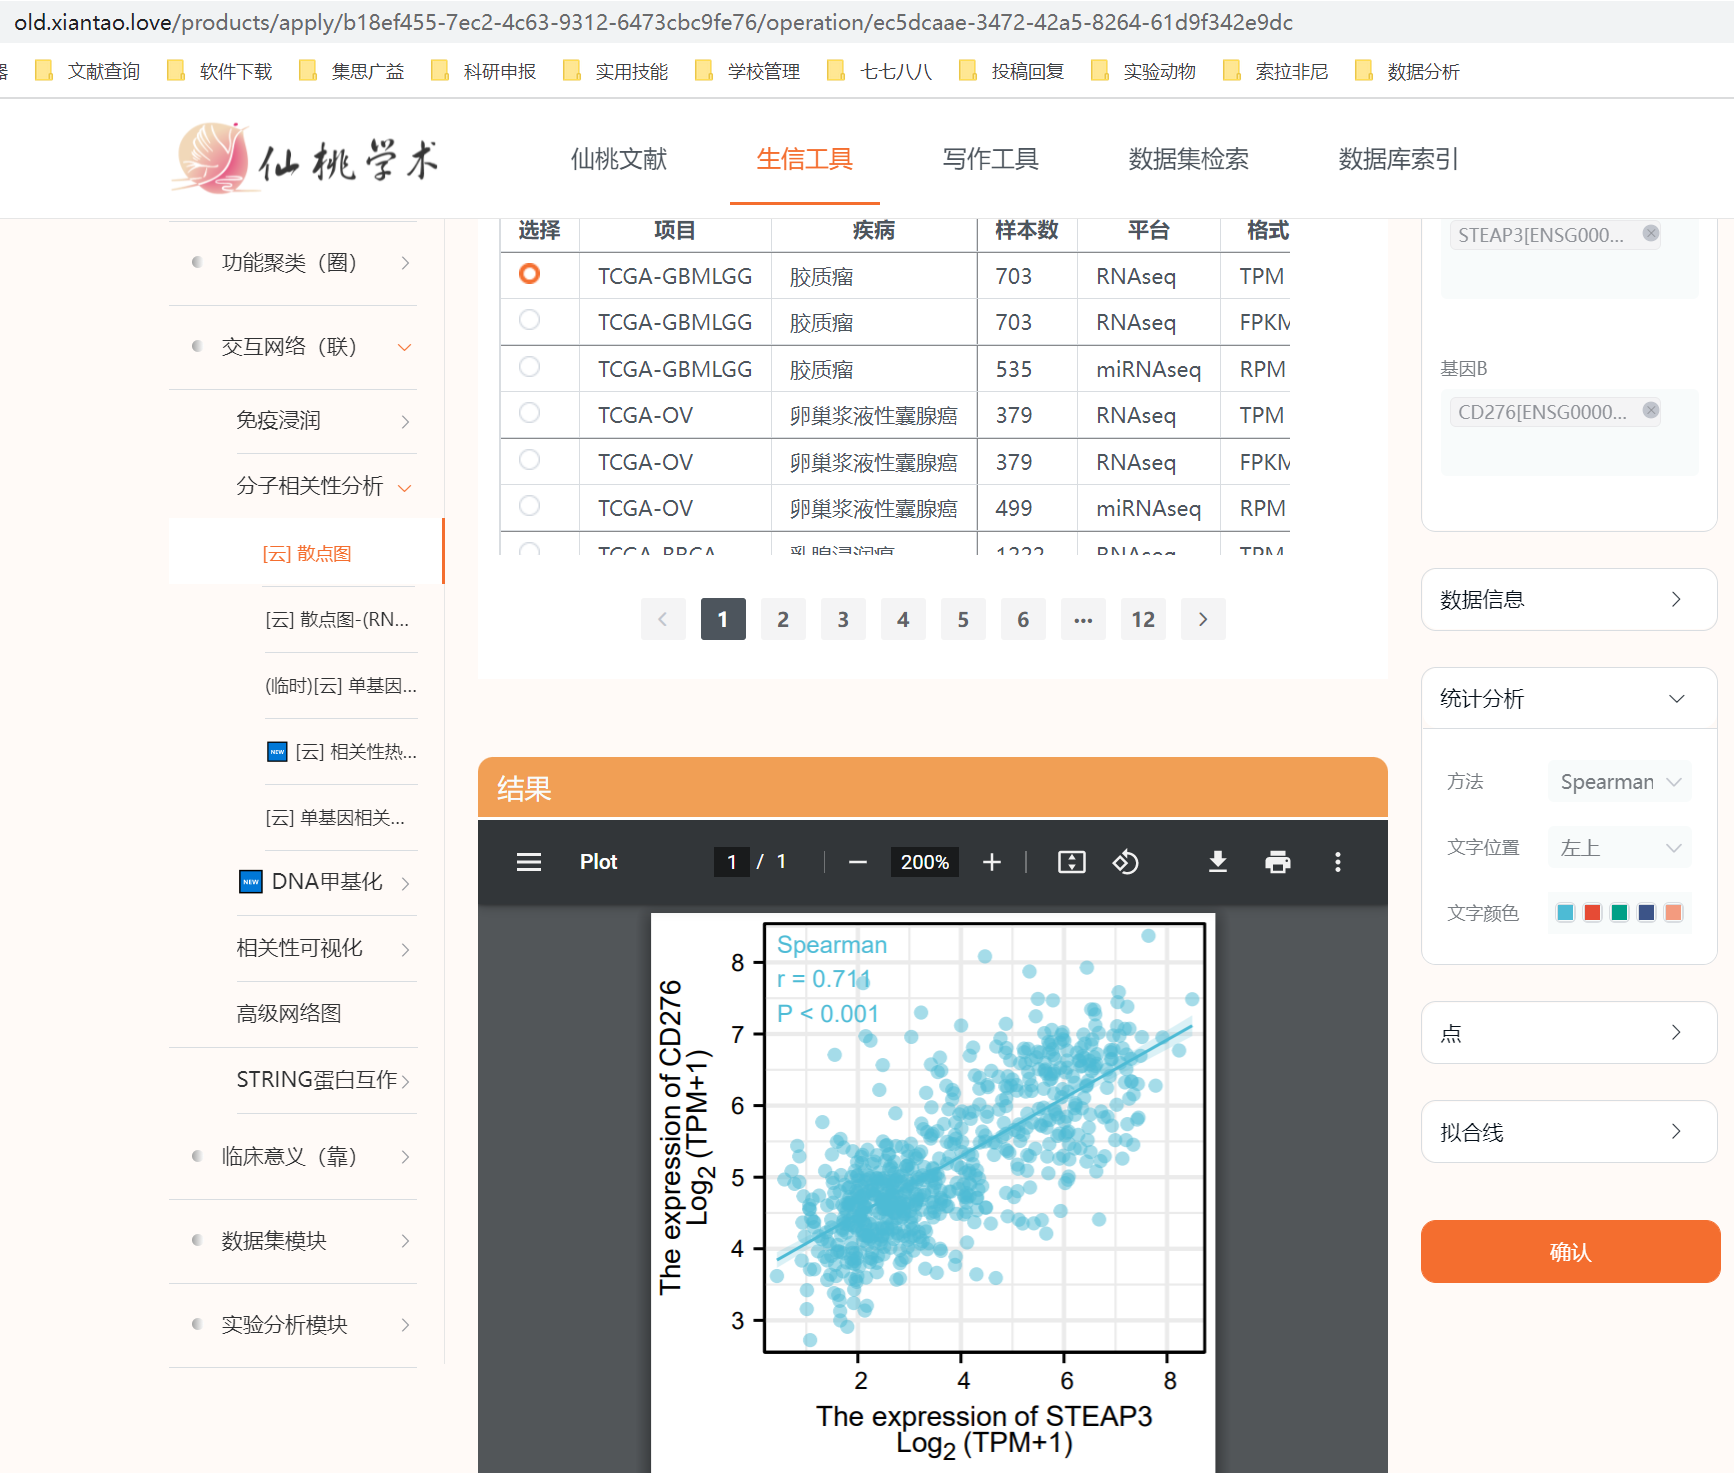


Figure 7D:


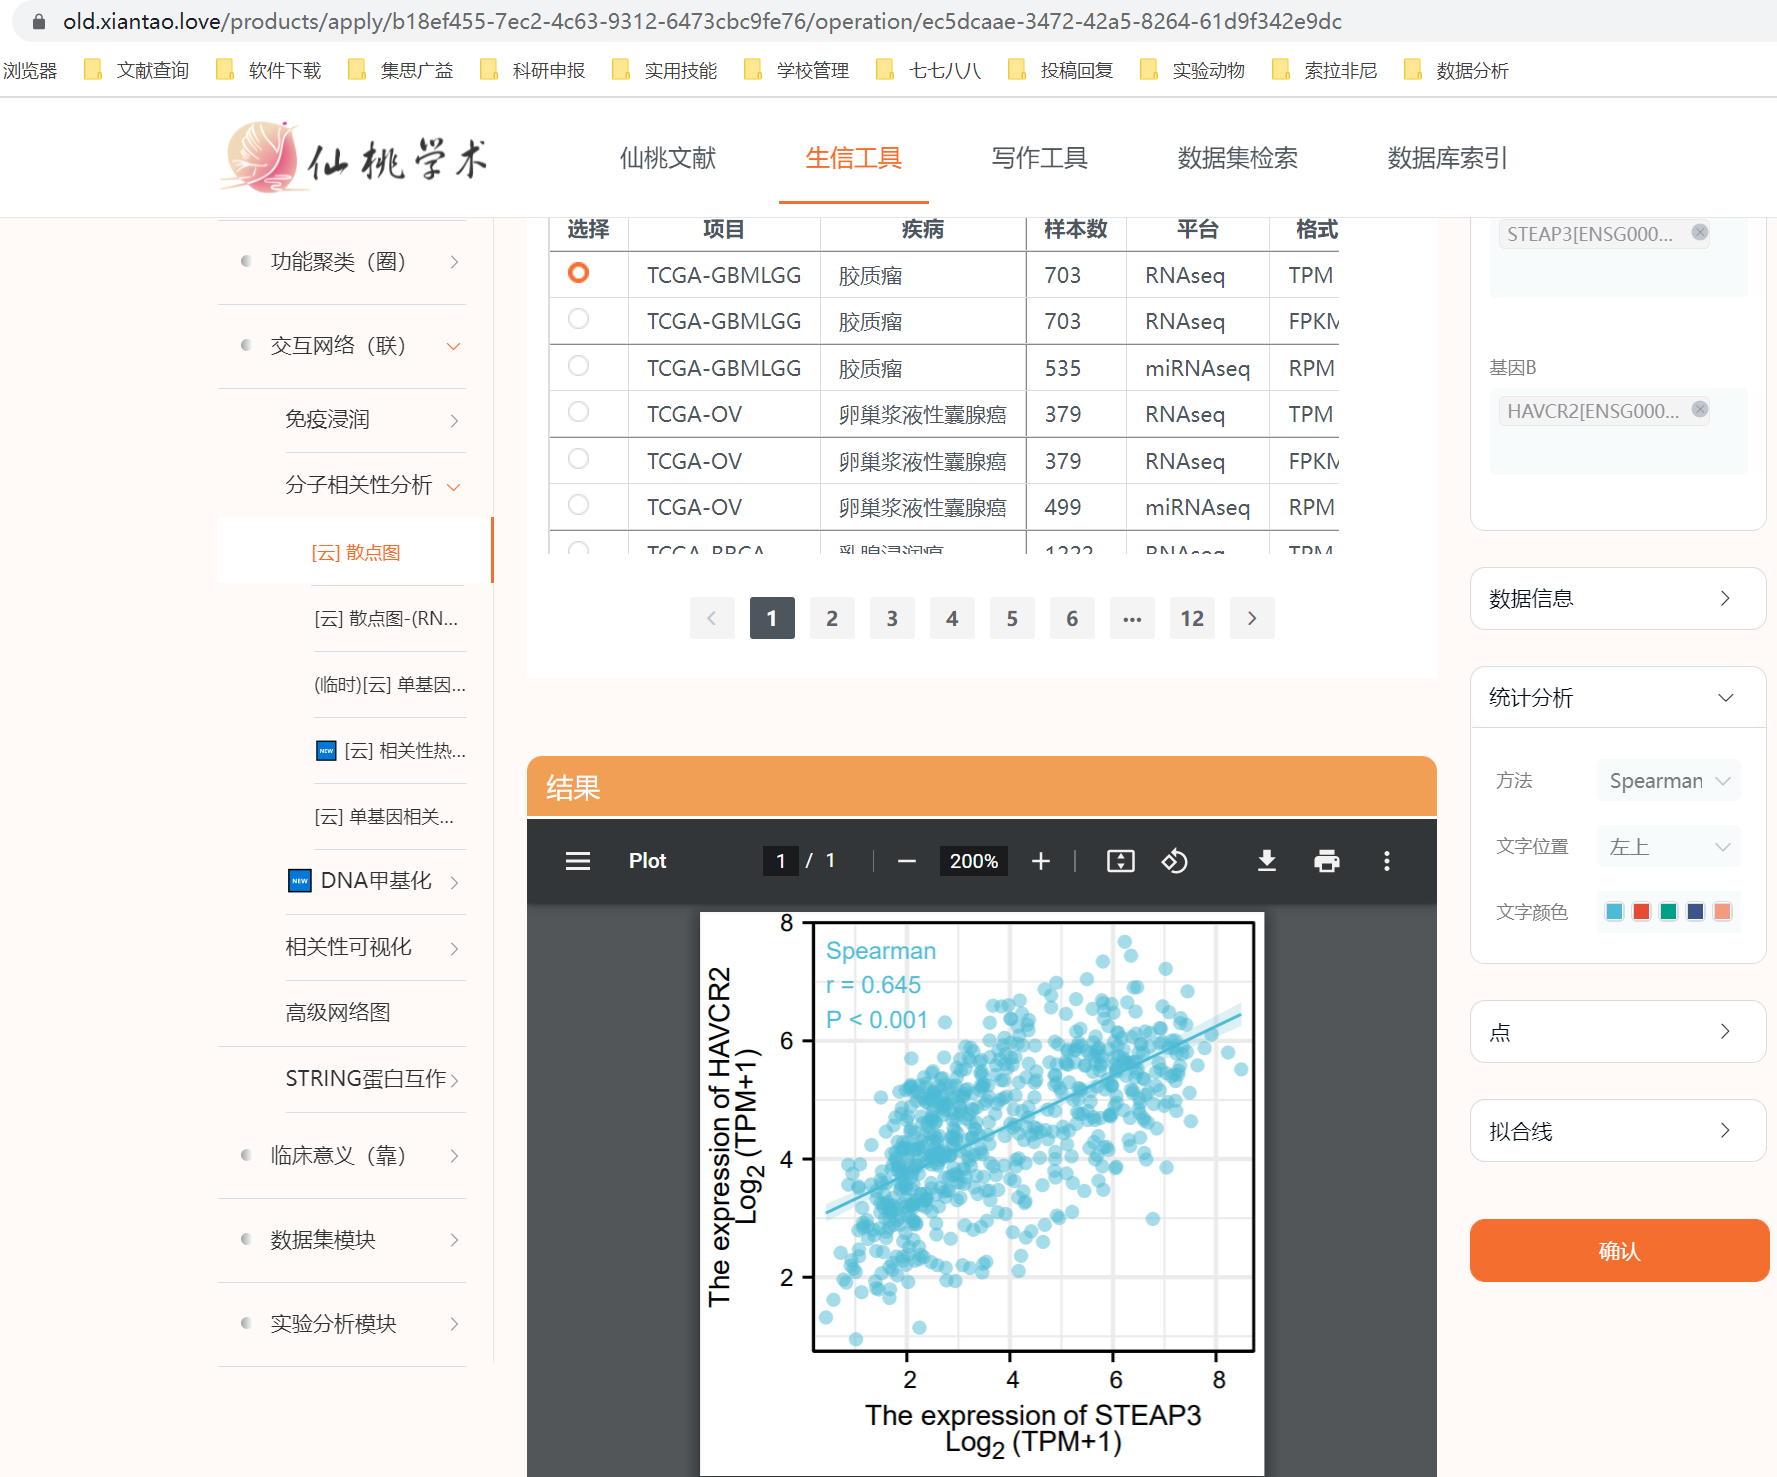


Figure 7E:


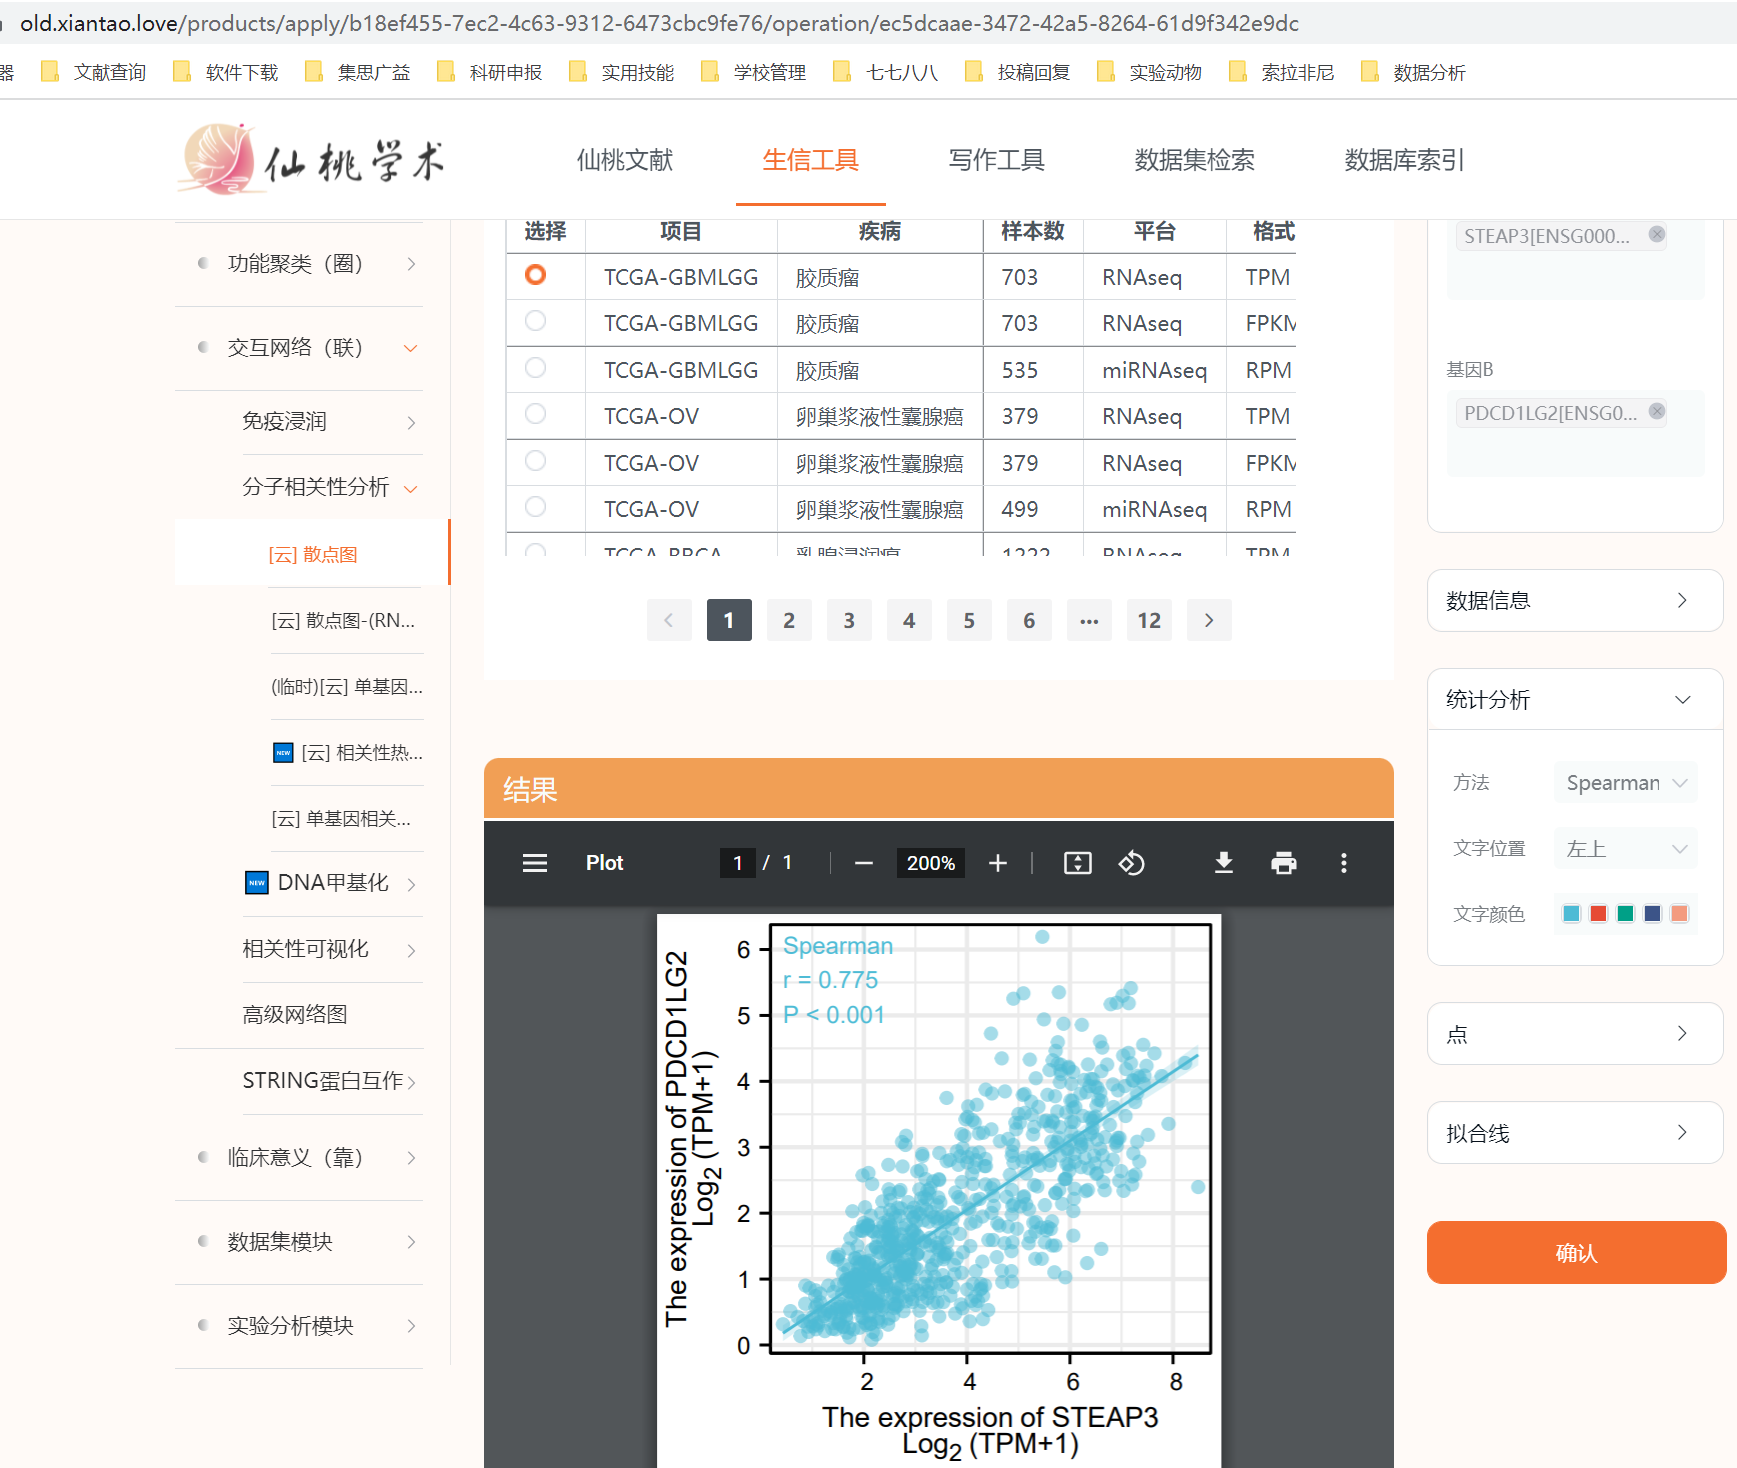


Figure 7H:


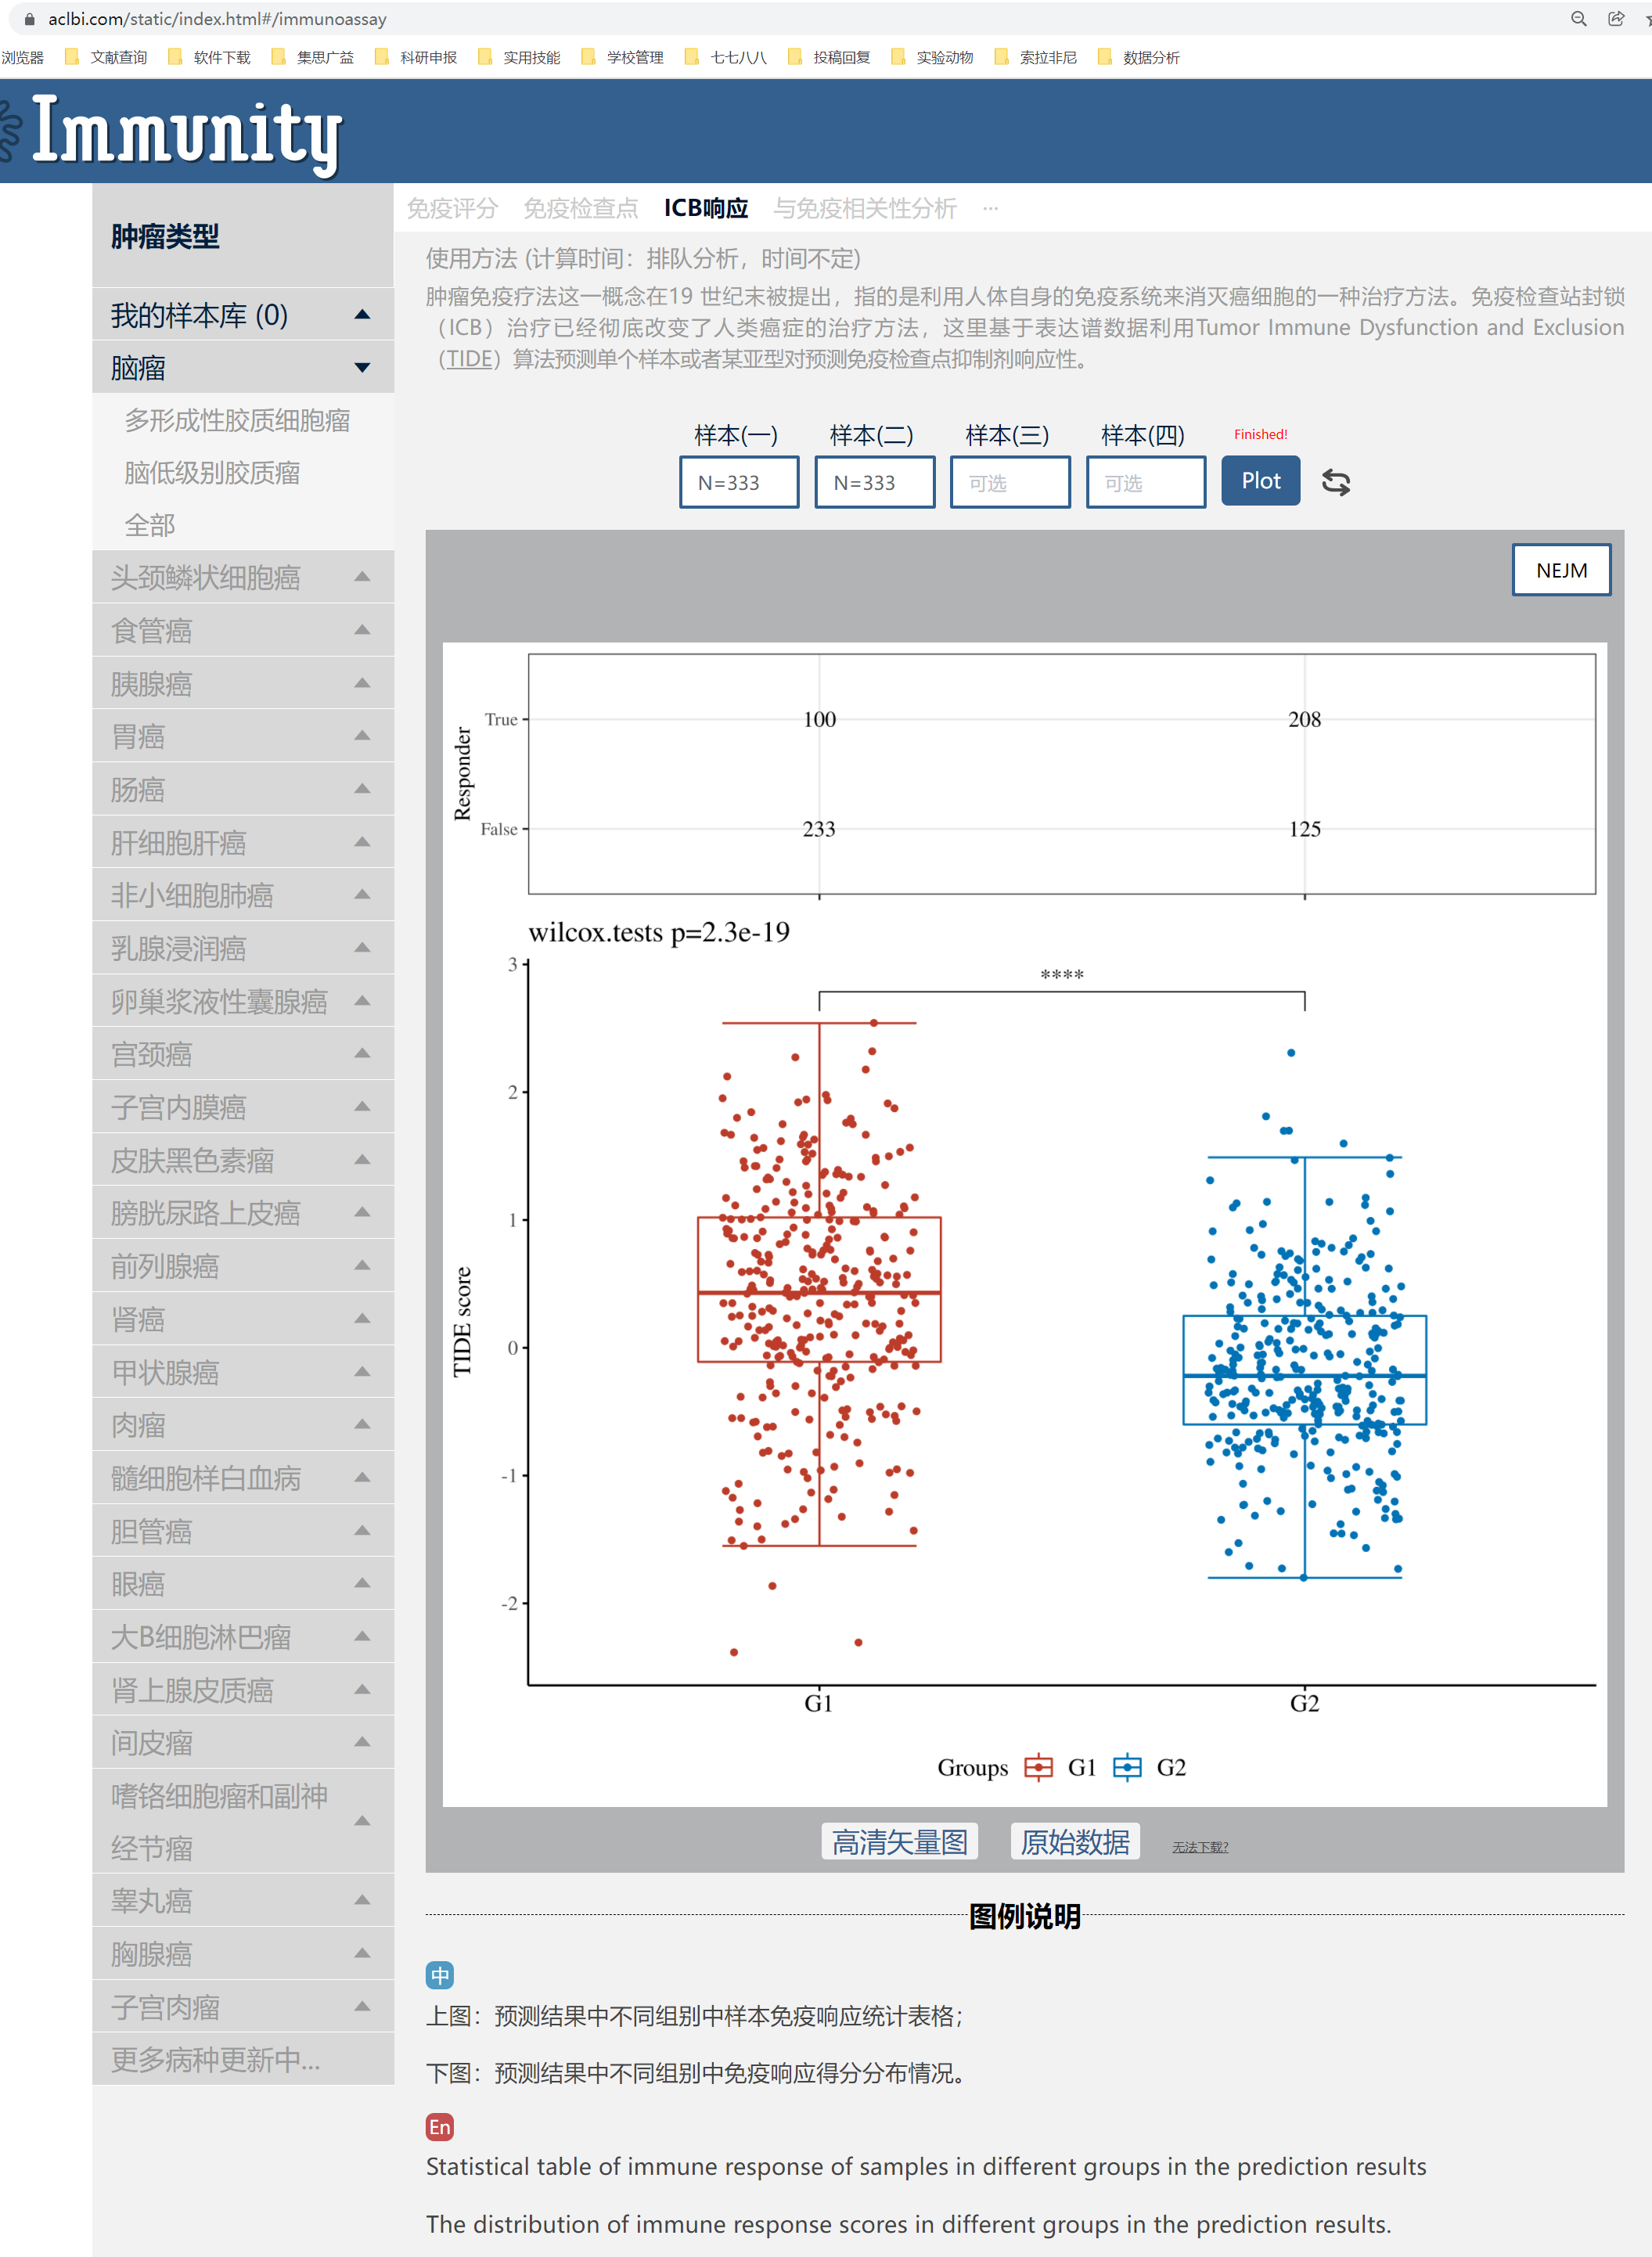

Supplement: raw_data_for_Figure_7.zip [file raw_data_for_Figure_7.zip]

Table 2


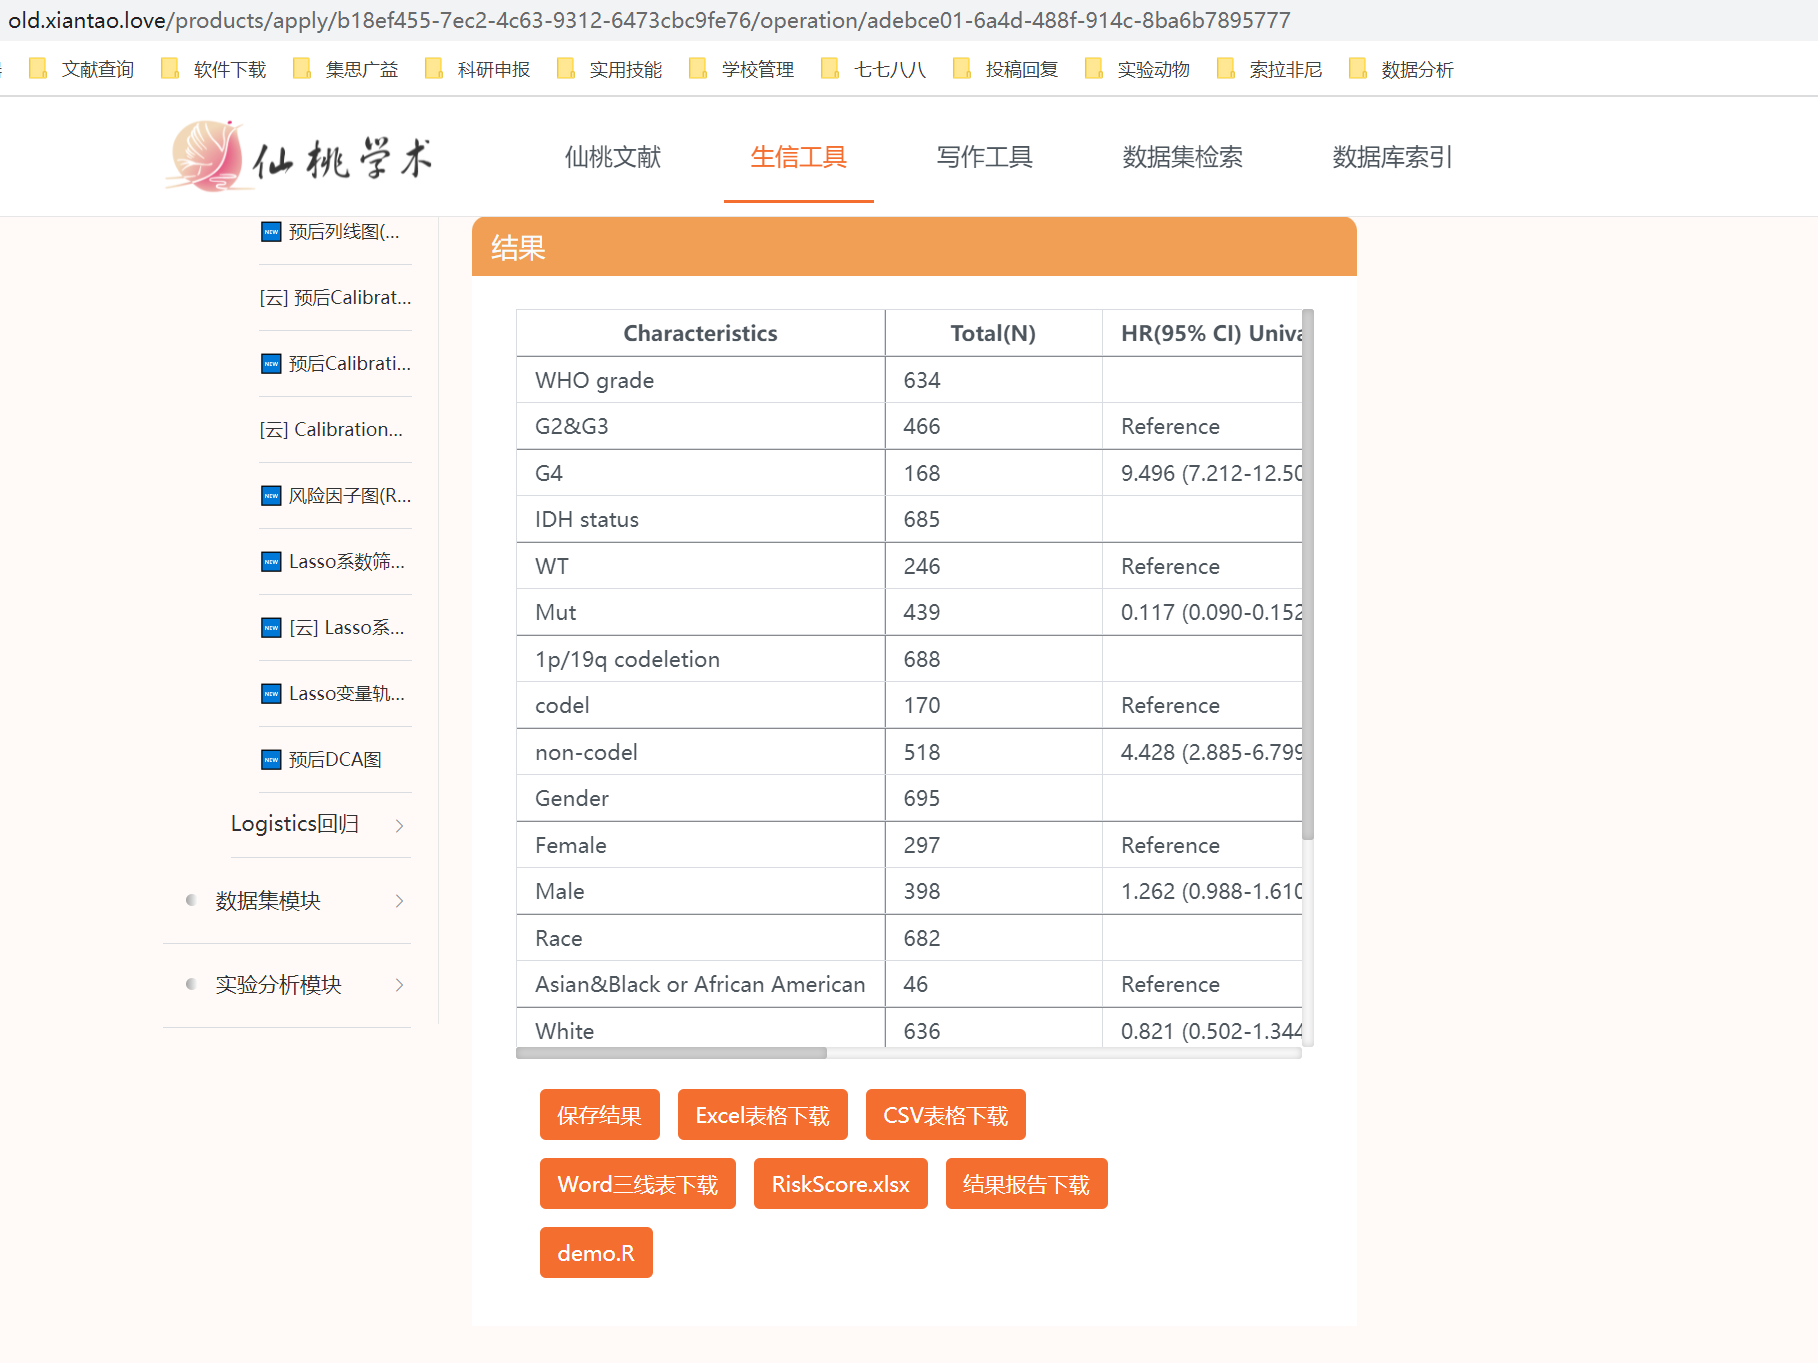

Supplement: raw_data_for_Table_2.zip [file raw_data_for_Table_2.zip]

Table 3


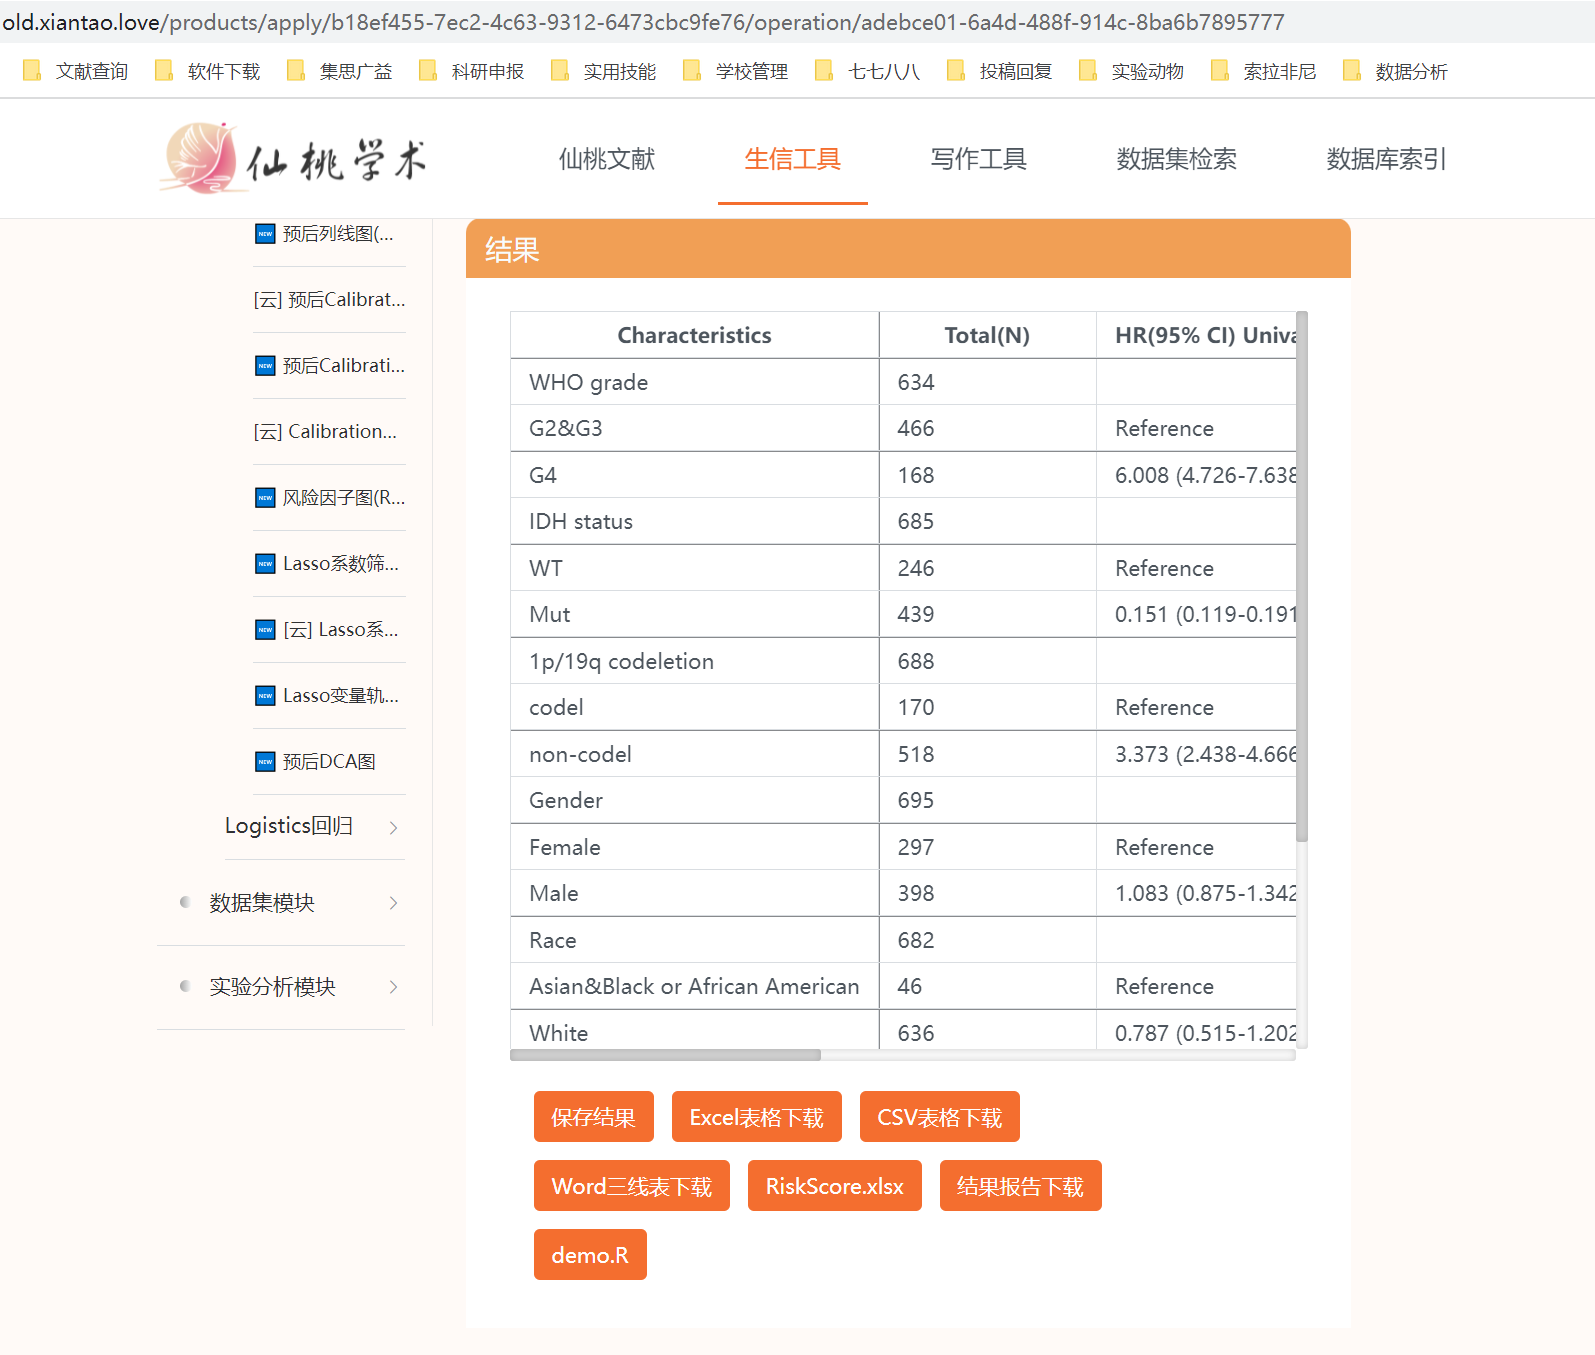

Supplement: raw_data_for_Table_3.zip [file raw_data_for_Table_3.zip]
